# Supplementary material for: Investigation of Peptide Toxin Diversity in Ribbon Worms (Nemertea) Using a Transcriptomic Approach
Source: MDPI journal article supplement (doi:10.3390/toxins14080542), 2022-08-08
Supplement: s1 [file s1]

# Supplementary Materials: Investigation of Peptide Toxins Diversity in Ribbon Worms (Nemertea) Using Transcriptomic Approach

Anna E. Vlasenko, Vasiliy G. Kuznetsov and Timur Yu. Magarlamov\*

Table S1. Toxin transcripts of *Carinoma hamanako*.

| Protein family                                                | Transcript ID                      | Uniprot accession | Description                                                                                     | e-value | Expression, TPM |
|---------------------------------------------------------------|------------------------------------|-------------------|-------------------------------------------------------------------------------------------------|---------|-----------------|
| Neurotoxins                                                   |                                    |                   |                                                                                                 |         |                 |
| Neurotoxin 20 family                                          | Gene.29146_r_16340_g.29146_m.29146 | TXCA_CAEEX        | U3-aranetoxin-Ce1a OS=Caerostris extrusa OX=172846 PE=2 SV=1                                    | 7.4E-06 | 39.36           |
| Pore-forming toxins                                           |                                    |                   |                                                                                                 |         |                 |
| Actinoporin family. Conoidea subfamily                        | Gene.23587_r_11081_g.23587_m.23587 | ACTP_CONCN        | Conoporin-Cn1 OS=Conus consors OX=101297 PE=1 SV=1                                              | 5.1E-09 | 7.21            |
| Enzymes                                                       |                                    |                   |                                                                                                 |         |                 |
| 5'- nucleotidase family                                       | Gene.35055_r_23242_g.35055_m.35055 | V5NTD_NAJAT       | Snake venom 5'-nucleotidase (Fragment) OS=Naja atra OX=8656 PE=1 SV=1                           | 1.5E-46 | 2.84            |
| Arthropod phospholipase D family. Class II subfamily          | Gene.22051_r_9780_g.22051_m.22051  | B1R2_LOXSN        | Dermonecrotic toxin LspiSicTox-betaIE1ii (Fragment) OS=Loxosceles spinulosa OX=571532 PE=2 SV=1 | 1.2E-40 | 45.45           |
| Dnase II family                                               | Gene.12683_r_4081_g.12683_m.12683  | DNA2_ACAPL        | Plancitoxin-1 OS=Acanthaster planci OX=133434 PE=1 SV=1                                         | 1.8E-74 | 10.12           |
| Nucleotide pyrophosphatase/phosphodiesterase family           | Gene.26217_r_13397_g.26217_m.26217 | PDE_MACLB         | Venom phosphodiesterase OS=Macrovipera lebetina OX=8709 PE=1 SV=1                               | 7.6E-36 | 4.58            |
| Phospholipase A2 family. Group I subfamily. D49 sub-subfamily | Gene.30711_r_18012_g.30711_m.30711 | PA2A_BUNMU        | Acidic phospholipase A2 OS=Bungarus multicinctus OX=8616 PE=1 SV=2                              | 1.1E-24 | 7.95            |
| Phospholipase A2 family. Group III subfamily                  | Gene.30102_r_17363_g.30102_m.30102 | PA23_HELSU        | Phospholipase A2 isozymes PA3A/PA3B/PA5 OS=Heloderma                                            | 7.5E-30 | 144.13          |

| suspectum OX=8554 PE=1<br>SV=3                                                |                                    |             |                                                                                                  |         |        |
|-------------------------------------------------------------------------------|------------------------------------|-------------|--------------------------------------------------------------------------------------------------|---------|--------|
| Phospholipase B-like family                                                   | Gene.12079_r_3800_g.12079_m.12079  | PLB_DRYCN   | Phospholipase-B 81 OS=Drysdalia coronoides OX=66186 PE=1 SV=1                                    | 0       | 11.45  |
| Venom metallo-proteinase (M12B) family. P-III subfamily. P-iiia sub-subfamily | Gene.13186_r_4338_g.13186_m.13186  | VM3K_NAJKA  | Hemorrhagic metalloproteinase-disintegrin-like kaouthiagin OS=Naja kaouthia OX=8649 PE=1 SV=1    | 1.4E-29 | 83.90  |
| Proteinase inhibitors                                                         |                                    |             |                                                                                                  |         |        |
| Venom Kunitz-type family                                                      | Gene.32798_r_20368_g.32798_m.32798 | VKT2_BITGA  | Kunitz-type serine protease inhibitor bitisilin-2 OS=Bitis gabonica OX=8694 PE=1 SV=1            | 5.9E-20 | 38.81  |
| Ion channel inhibitors                                                        |                                    |             |                                                                                                  |         |        |
| CRISP family                                                                  | Gene.16102_r_5875_g.16102_m.16102  | CRVP_LATSE  | Cysteine-rich venom protein latisemin OS=Laticauda semifasciata OX=8631 PE=2 SV=1                | 1.3E-26 | 12.67  |
|                                                                               | Gene.11853_r_3703_g.11853_m.11853  | CRVP_HOPST  | Cysteine-rich venom protein pseudochetoxin-like OS=Hoplocephalus stephensii OX=196418 PE=2 SV=1  | 3.6E-29 | 9.52   |
|                                                                               | Gene.9077_r_2517_g.9077_m.9077     | CRVP_LEIMD  | Cysteine-rich venom protein LEI1 (Fragment) OS=Leioheterodon madagascariensis OX=46577 PE=1 SV=1 | 2.5E-30 | 9.87   |
|                                                                               | Gene.21131_r_9101_g.21131_m.21131  | CRVP_TRILK  | CRISP/Allergen/PR-1 OS=Tritame loki OX=1295018 PE=1 SV=1                                         | 1.4E-33 | 464.73 |
|                                                                               | Gene.22696_r_10292_g.22696_m.22696 | CRVP2_NAJKA | Cysteine-rich venom protein kaouthin-2 OS=Naja kaouthia OX=8649 PE=1 SV=2                        | 2.7E-40 | 10.31  |
|                                                                               | Gene.26019_r_13221_g.26019_m.26019 | CRVP_TELDH  | Cysteine-rich venom protein TEL1 (Fragment) OS=Telescopus dhara OX=338837 PE=2 SV=1              | 1.6E-28 | 6.49   |
| CRISP family. Venom allergen 5-like subfamily                                 | Gene.44110_r_37299_g.44110_m.44110 | VA543_SCODE | Scoloptoxin SSD43 OS=Scolopendra dehaani OX=2609776 PE=1 SV=1                                    | 2.4E-12 | 20.57  |
|                                                                               | Gene.33252_r_20934_g.33252_m.33252 | VA5_VESVI   | Venom allergen 5 OS=Urospora vidua OX=30215 PE=1 SV=1                                            | 2.4E-27 | 6.97   |

|                                                                                |                                    |              |                                                                                                    |         |        |
|--------------------------------------------------------------------------------|------------------------------------|--------------|----------------------------------------------------------------------------------------------------|---------|--------|
| Scoloptoxin-05 family                                                          | Gene.14011_r_4742_g.14011_m.14011  | TX51A_SCOMO  | U-scoloptoxin(05)-Sm1a OS=Scolopendra morsi-tans OX=943129 PE=2 SV=1                               | 8.6E-07 | 6.63   |
| Scoloptoxin-11 family                                                          | Gene.38036_r_27351_g.38036_m.38036 | TX14B_SCODE  | Scoloptoxin SSD20 (Frag-ment) OS=Scolopendra dehaani OX=2609776 PE=1 SV=1                          | 2.4E-27 | 7.46   |
| Venom Kunitz-type family. Sea anemone type 2 potassium channel toxin subfamily | Gene.48512_r_45419_g.48512_m.48512 | VKT1A_ANEVI  | U-actitoxin-Avd3f OS=Anemonia viridis OX=51769 PE=3 SV=15,                                         | 1E-09   | 57.06  |
|                                                                                | Gene.37015_r_25865_g.37015_m.37015 | VKTB_ANEVI   | U-actitoxin-Avd3n OS=Anemonia viridis OX=51769 PE=3 SV=1                                           | 3.5E-14 | 20.64  |
|                                                                                | Gene.35176_r_23397_g.35176_m.35176 | VKT5_ANEVI   | U-actitoxin-Avd3h OS=Anemonia viridis OX=51769 PE=3 SV=14,                                         | 9E-20   | 7.23   |
| Other toxins candidates                                                        |                                    |              |                                                                                                    |         |        |
| AVIT (prokineticin) family                                                     | Gene.32199_r_19665_g.32199_m.32199 | BO8_BOMOR    | Prokineticin Bo8 OS=Bom-bina orientalis OX=8346 PE=1 SV=1                                          | 6.5E-07 | 76.69  |
| EGF-like, Sushi, TSP type-1, LDL-receptor class A                              | Gene.17457_r_6644_g.17457_m.17457  | CTX_SEPES    | SE-cephalotoxin OS=Sepia esculenta OX=31210 PE=1 SV=1                                              | 1.1E-07 | 16.51  |
| Elevenin - like                                                                | Gene.38214_r_27621_g.38214_m.38214 | CELE_CONV    | Elevenin-Vc1 OS=Conus victoriae OX=319920 PE=1 SV=1                                                | 1.3E-06 | 11.90  |
| Glycoprotein hormones subunit alpha family                                     | Gene.21463_r_9336_g.21463_m.21463  | CTHA2_CONV C | Thyrostimulin alpha-2 subunit OS=Conus victo-riae OX=319920 PE=1 SV=1                              | 4.9E-31 | 9.14   |
| Glycoprotein hormones subunit beta family                                      | Gene.35802_r_24219_g.35802_m.35802 | CTHB5_CONV   | Thyrostimulin beta-5 sub-unit OS=Conus victoriae OX=319920 PE=2 SV=1                               | 3E-17   | 3.73   |
| IGFBP N-termi-nal, Kazal-like, Ig-like C2-type                                 | Gene.20580_r_8675_g.20580_m.20580  | IGFBP_CUPSA  | Insulin-like growth factor-binding protein-related protein 1 OS=Cupiennius salei OX=6928 PE=2 SV=1 | 4.4E-68 | 42.79  |
| TCTP family                                                                    | Gene.14168_r_4820_g.14168_m.14168  | TCTP_BRABE   | Translationally-controlled tumor protein homolog OS=Branchiostoma belch-eri OX=7741 PE=2 SV=1      | 2.2E-19 | 7.96   |
|                                                                                | Gene.16043_r_5846_g.16043_m.16043  | TCTP_BRAOL   | Translationally-controlled tumor protein homolog OS=Brassica oleracea OX=3712 GN=TCTP PE=2 SV=1    | 7.1E-23 | 325.64 |

**Table S2.** Toxin transcripts of *Cephalothrix hongkongiensis*. Unique toxins families are shown in bold.

| Protein family                                       | Transcript ID                           | Uniprot accession | Description                                                                                      | E-value | Expression, TPM |
|------------------------------------------------------|-----------------------------------------|-------------------|--------------------------------------------------------------------------------------------------|---------|-----------------|
| Neurotoxins                                          |                                         |                   |                                                                                                  |         |                 |
| Neurotoxin 20 family                                 | Gene.34245_c_hong_26879_g.34245_m.34245 | TXCA_CAEEX        | U3-aranetoxin-Ce1a OS=Caerostris extrusa OX=172846 PE=2 SV=1                                     | 4E-06   | 199.67          |
| Pore-forming toxins                                  |                                         |                   |                                                                                                  |         |                 |
| Actinoporin family. Conoidea subfamily               | Gene.11883_c_hong_4214_g.11883_m.11883  | ACTP1_TERAN       | Tereporin-Ca1 (Fragment) OS=Ter-ebra anilis OX=553697 PE=2 SV=1                                  | 1.8E-25 | 16.88           |
| Actinoporin family. Sea anemone subfamily            | Gene.26045_c_hong_15774_g.26045_m.26045 | ACTP2_PHYSE       | DELTA-alicitoxin-Pse1b OS=Phyllo-discus semoni OX=163701 PE=2 SV=1                               | 4.9E-13 | 36.99           |
|                                                      | Gene.35099_c_hong_28188_g.35099_m.35099 | ACTP1_SAGRO       | DELTA-sagatoxin-Srs1a OS=Sagartia rosea OX=396345 PE=1 SV=1                                      | 8.5E-19 | 1.96            |
| MACPF domain                                         | Gene.18196_c_hong_8305_g.18196_m.18196  | TX60A_ACTVL       | DELTA-thalatoxin-Avl2a OS=ActinERIA villosa OX=227975 PE=1 SV=1                                  | 9E-59   | 16.88           |
|                                                      | Gene.5492_c_hong_1368_g.5492_m.5492     | TX60B_PHYSE       | DELTA-alicitoxin-Pse2b OS=Phyllo-discus semoni OX=163701 PE=1 SV=21,2                            | 1E-65   | 14.88           |
|                                                      | Gene.6822_c_hong_1836_g.6822_m.6822     | TX60A_PHYSE       | DELTA-alicitoxin-Pse2a OS=Phyllo-discus semoni OX=163701 PE=1 SV=1                               | 7.5E-77 | 113.04          |
| Enzymes                                              |                                         |                   |                                                                                                  |         |                 |
| 5'- nucleotidase family                              | Gene.8680_c_hong_2612_g.8680_m.8680     | V5NTD_NAJAT       | Snake venom 5'-nucleotidase (Fragment) OS=Naja atra OX=8656 PE=1 SV=1                            | 8E-153  | 5.61            |
| Arthropod phospholipase D family. Class II subfamily | Gene.31998_c_hong_23588_g.31998_m.31998 | A1LB2_LOXAR       | Dermonecrotic toxin larsictox-alphaib2bii (Fragment) OS=Loxosceles arizonica OX=196454 PE=2 SV=1 | 6.9E-26 | 5.62            |

|                                                     |                                         |             |                                                                                                    |         |       |
|-----------------------------------------------------|-----------------------------------------|-------------|----------------------------------------------------------------------------------------------------|---------|-------|
|                                                     | Gene.18047_c_hong_8189_g.18047_m.18047  | A1I1_LOXSP  | Dermonecrotic toxin Ispasictox-alpha2i (Fragment)<br>OS=Loxosceles spadicca OX=571530<br>PE=2 SV=1 | 3.9E-47 | 14.08 |
| Dnase II family                                     | Gene.10361_c_hong_3406_g.10361_m.10361  | DNA2_ACAPL  | Plancitoxin-1<br>OS=Acanthaster planci OX=133434<br>PE=1 SV=1                                      | 2.4E-71 | 3.65  |
| Flavin mono-amine oxidase family. FIG1 subfamily    | Gene.29350_c_hong_19924_g.29350_m.29350 | OXLA_CROAT  | L-amino-acid oxidase apoxin-1<br>OS=Crotalus atrox OX=8730 PE=1<br>SV=2                            | 2.9E-20 | 3.10  |
| Glycosyl hydrolase 56 family                        | Gene.17971_c_hong_8131_g.17971_m.17971  | HYAL1_MESMA | Hyaluronidase-1<br>OS=Mesobuthus martensii<br>OX=34649 PE=1<br>SV=2                                | 1.1E-54 | 5.89  |
| Nucleotide pyrophosphatase/phosphodiesterase family | Gene.11880_c_hong_4213_g.11880_m.11880  | PDE_CRODO   | Venom phosphodiesterase cdcpde<br>OS=Crotalus durissus collilineatus<br>OX=221569 PE=1<br>SV=1     | 2.1E-66 | 3.74  |
|                                                     | Gene.27311_c_hong_17262_g.27311_m.27311 | PDE1_CROAD  | Venom phosphodiesterase 1<br>OS=Crotalus adamanteus OX=8729<br>PE=1 SV=2                           | 1.7E-66 | 3.62  |
| Phospholipase A2 family                             | Gene.24117_c_hong_13701_g.24117_m.24117 | PA21_SCODE  | Phospholipase A2 SSD387 OS=Scolopendra dehaani<br>OX=2609776 PE=1<br>SV=1                          | 1.8E-25 | 5.78  |
| Phospholipase A2 family. Group III subfamily        | Gene.17905_c_hong_8085_g.17905_m.17905  | PA23_HELSU  | Phospholipase A2 isozymes<br>PA3A/PA3B/PA5<br>OS=Heloderma suspectum<br>OX=8554 PE=1<br>SV=3       | 1.4E-20 | 39.35 |
|                                                     | Gene.16417_c_hong_7078_g.16417_m.16417  | PA2A2_HELSU | Acidic phospholipase A2 PA4<br>OS=Heloderma suspectum<br>OX=8554 PE=1<br>SV=2                      | 3.2E-36 | 8.47  |

|                                                                                    |                                                |                    |                                                                                                 |                |             |
|------------------------------------------------------------------------------------|------------------------------------------------|--------------------|-------------------------------------------------------------------------------------------------|----------------|-------------|
| Venom metalloproteinase (M12B) family. P-III subfamily. P-iiia sub-subfamily       | Gene.47013_c_hong_50313_g.47013_m.47013        | VM3_CERRY          | Zinc metalloproteinase-disintegrin-like OS=Cerberus rynchops OX=46267 PE=1 SV=1                 | 6.6E-14        | 6.06        |
| <b>Venom metalloproteinase (M12B) family. P-II subfamily. P-iiid sub-subfamily</b> | <b>Gene.32433_c_hong_24210_g.32433_m.32433</b> | <b>VM2SA_GLOSA</b> | <b>Zinc metalloproteinase/disintegrin OS=Gloydus saxatilis OX=92067 PE=2 SV=1</b>               | <b>1.4E-11</b> | <b>3.58</b> |
| Ion channel inhibitor activity                                                     |                                                |                    |                                                                                                 |                |             |
| CRISP family                                                                       | Gene.21111_c_hong_10759_g.21111_m.21111        | CRVP_OXYMI         | Cysteine-rich venom protein pseudochetoxin-like OS=Oxyuranus microlepidotus OX=111177 PE=2 SV=1 | 6.4E-30        | 4.19        |
|                                                                                    | Gene.749_c_hong_89_g.749_m.749                 | CRVP_HOPST         | Cysteine-rich venom protein pseudochetoxin-like OS=Hoplocephalus stephensii OX=196418 PE=2 SV=1 | 2.7E-30        | 27.92       |
|                                                                                    | Gene.22720_c_hong_12307_g.22720_m.22720        | CRVP_AUSSU         | Cysteine-rich venom protein OS=Austrelaps superbis OX=29156 PE=2 SV=1                           | 9.2E-36        | 3.07        |
|                                                                                    | Gene.6717_c_hong_1800_g.6717_m.6717            | CRVP_ERYPO         | Cysteine-rich venom protein LIO1 (Fragment) OS=Erythrolamprus poecilogyrus OX=338838 PE=2 SV=1  | 7.4E-37        | 4.53        |
|                                                                                    | Gene.12301_c_hong_4442_g.12301_m.12301         | MR30_CONMR         | Cysteine-rich venom protein Mr30 OS=Conus marmoreus OX=42752 PE=1 SV=1                          | 2.1E-39        | 5.22        |
| CRISP family. Venom allergen 5-like subfamily                                      | Gene.38009_c_hong_33066_g.38009_m.38009        | VA51_VESCR         | Venom allergen 5.01 OS=Vespa crabro OX=7445 PE=1 SV=1                                           | 7.5E-15        | 1.45        |

|                                                   |                                         |             |                                                                                                             |         |       |
|---------------------------------------------------|-----------------------------------------|-------------|-------------------------------------------------------------------------------------------------------------|---------|-------|
|                                                   | Gene.15844_c_hong_6675_g.15844_m.15844  | VA576_SCODE | Scoloptoxin SSD976 OS=Scolopendra dehaani OX=2609776 PE=1 SV=1                                              | 3.2E-25 | 6.48  |
| Scoloptoxin-05 family                             | Gene.29823_c_hong_20580_g.29823_m.29823 | TX51A_ETHRU | U-scoloptoxin(05)-Er1a OS=Eth-mostigmus rubripes OX=62613 PE=2 SV=1                                         | 1E-06   | 2.87  |
| Sea anemone type 5 potassium channel toxin family | Gene.30277_c_hong_21219_g.30277_m.30277 | KV53_BUNCI  | Kappa-actitoxin-Bcs4a OS=Bunodosoma caesarum OX=31165 PE=1 SV=1                                             | 2.6E-19 | 9.35  |
| Hemostasis impairing toxin                        |                                         |             |                                                                                                             |         |       |
| Snaclec family                                    | Gene.43733_c_hong_43800_g.43733_m.43733 | SLUA_DEIAC  | Snaclec agkisacutacin subunit A OS=Deinagkistrodon acutus OX=36307 PE=1 SV=2                                | 1.7E-09 | 4.39  |
|                                                   | Gene.48482_c_hong_53305_g.48482_m.48482 | VA5_VESPE   | Venom allergen 5 OS=Vespula pennsylvanica OX=30213 PE=1 SV=1                                                | 5E-10   | 3.00  |
|                                                   | Gene.7929_c_hong_2279_g.7929_m.7929     | SLLC2_DABSI | Snaclec coagulation factor X-activating enzyme light chain 2 OS=Daboia siamensis OX=343250 GN=LC2 PE=1 SV=1 | 8.1E-09 | 14.65 |
| SNTX/VTX toxin family                             | Gene.32124_c_hong_23751_g.32124_m.32124 | CTXB_SCOPL  | Cytolytic toxin-beta OS=Scorpaena plumieri OX=274700 PE=1 SV=1                                              | 4.5E-19 | 1.96  |
|                                                   | Gene.938_c_hong_118_g.938_m.938         | CTXA_SCOPL  | Cytolytic toxin-alpha OS=Scorpaena plumieri OX=274700 PE=1 SV=1                                             | 4.1E-52 | 27.73 |
| Other toxins candidates                           |                                         |             |                                                                                                             |         |       |
| Conotoxin-like                                    | Gene.35778_c_hong_29319_g.35778_m.35778 | CXE3_CONIM  | Conotoxin Im14.3 OS=Conus imperialis OX=35631 PE=1 SV=1                                                     | 1E-07   | 2.98  |
| EGF-like, Sushi, TSP type-1,                      | Gene.12659_c_hong_4652_g.12659_m.4652   | CTX_SEPES   | SE-cephalotoxin OS=Sepia esculenta                                                                          | 4.7E-73 | 8.01  |

|                                                      |                                         |             |                                                                                                    |         |       |
|------------------------------------------------------|-----------------------------------------|-------------|----------------------------------------------------------------------------------------------------|---------|-------|
| LDL-receptor class A                                 | g.12659_m.12659                         |             | OX=31210 PE=1 SV=1                                                                                 |         |       |
| Elevenin-like                                        | Gene.46986_c_hong_50253_g.46986_m.46986 | CELE_CONVC  | Elevenin-Vc1 OS=Conus victoriae OX=319920 PE=1 SV=1                                                | 2E-07   | 5.19  |
| IGFBP N-terminal domain, Kazal-like, Ig-like C2-type | Gene.20111_c_hong_9872_g.20111_m.20111  | IGFBP_CUPSA | Insulin-like growth factor-binding protein-related protein 1 OS=Cupiennius salei OX=6928 PE=2 SV=1 | 4.6E-62 | 14.00 |
| Vasopressin/oxytocin family                          | Gene.40543_c_hong_37563_g.40543_m.40543 | CESS2_CONMO | Conopresin/conophysin, isoform 2 (Fragment) OS=Conus monile OX=351660 PE=2 SV=1                    | 2.6E-24 | 3.22  |

**Table S3.** Toxin transcripts of *Cephalothrix cf. simula*. Unique toxins families are shown in bold. The expression might be quantified using Illumina reads only. No expression values were obtained for toxins transcripts from MinIon Oxford nanopore sequencing; they were assigned as NA.

| Protein family                            | Transcript ID                                     | Uniprot accession | Description                                                     | E-value | Expression, TPM |
|-------------------------------------------|---------------------------------------------------|-------------------|-----------------------------------------------------------------|---------|-----------------|
| Neurotoxins                               |                                                   |                   |                                                                 |         |                 |
| Neurotoxin 20 family                      | Gene.485063_csim_min-ion_347459_g.485063_m.485063 | TXCA_CAEEX        | U3-aranetoxin-Ce1a OS=Caerostris extrusa OX=172846 PE=2 SV=1    | 4E-06   | 30.77           |
| Pore-forming toxins                       |                                                   |                   |                                                                 |         |                 |
| Actinoporin family. Conoidea subfamily    | Gene.35246_csim_min-ion_9736_g.35246_m.35246      | ACTP1_TERSU       | Tereporin-Ts1 (Fragment) OS=Ter-ebr subulata OX=89435 PE=2 SV=1 | 2.9E-13 | NA              |
|                                           | Gene.335613_csim_min-ion_180378_g.335613_m.335613 | ACTP1_TERAN       | Tereporin-Ca1 (Fragment) OS=Ter-ebr anilis OX=553697 PE=2 SV=1  | 2.9E-26 | NA              |
| Actinoporin family. Sea anemone subfamily | Gene.474824_csim_min-ion_331394_g.474824_m.474824 | ACTP5_ACTEQ       | DELTA-actitoxin-Aeq1b OS=Actinia equina OX=6106 PE=2 SV=1       | 1.4E-09 | NA              |
|                                           | Gene.407909_csim_min-ion_249004_g                 | ACTP2_PHYSE       | DELTA-alicitoxin-Pse1b OS=Phyllo-discus semoni                  | 2E-15   | NA              |



|                                                      |                                                           |             |                                                                                                                    |         |        |
|------------------------------------------------------|-----------------------------------------------------------|-------------|--------------------------------------------------------------------------------------------------------------------|---------|--------|
|                                                      | .407909_m.407909                                          |             | OX=163701 PE=2 SV=1                                                                                                |         |        |
| MACPF domain                                         | Gene.301043<br>_csim_min-ion_153953_g<br>.301043_m.301043 | TX60A_ACTVL | DELTA-thalatoxin-Avl2a OS=Actinervilla villosa OX=227975 PE=1 SV=1                                                 | 4.6E-66 | 31.85  |
|                                                      | Gene.273396<br>_csim_min-ion_135569_g<br>.273396_m.273396 | TX60A_PHYSE | DELTA-alicitoxin-Pse2a OS=Phyllo-discus semoni OX=163701 PE=1 SV=1                                                 | 4.3E-77 | 115.63 |
|                                                      | Gene.293181<br>_csim_min-ion_148573_g<br>.293181_m.293181 | TX60B_PHYSE | DELTA-alicitoxin-Pse2b OS=Phyllo-discus semoni OX=163701 PE=1 SV=2                                                 | 1.2E-80 | 0.58   |
| Enzymes                                              |                                                           |             |                                                                                                                    |         |        |
| 5'- nucleotidase family                              | Gene.197718<br>_csim_min-ion_86712_g<br>.197718_m.197718  | V5NTD_GLOBR | Snake venom 5'-nucleotidase OS=Gloydus brevicaudus OX=259325 PE=2 SV=1                                             | 3.2E-22 | NA     |
| Arthropod phospholipase D family. Class II subfamily | Gene.464893<br>_csim_min-ion_317229_g<br>.464893_m.464893 | A21_LOXVA   | Dermonecrotic toxin lvsictox-alpha1i1 (Fragment) OS=Loxosceles variegata OX=571533 PE=2 SV=1                       | 7.1E-11 | NA     |
|                                                      | Gene.510941<br>_csim_min-ion_397287_g<br>.510941_m.510941 | B1R_LOXAS   | Dermonecrotic toxin lfsictox-beta1e1 (Fragment) OS=Loxosceles aff. Spinulosa (strain GJB-2008) OX=575951 PE=2 SV=1 | 8.6E-12 | NA     |
|                                                      | Gene.403668<br>_csim_min-ion_244462_g<br>.403668_m.403668 | A1O_LOXGA   | Dermonecrotic toxin lgsictox-alpha1c1 OS=Loxosceles gaucho OX=58216 PE=1 SV=1                                      | 1.5E-14 | NA     |
|                                                      | Gene.381627<br>_csim_min-ion_221329_g<br>.381627_m.381627 | B1H2_LOXIN  | Dermonecrotic toxin lisictox-beta1a1ii OS=Loxosceles intermedia OX=58218 PE=2 SV=1                                 | 4.7E-15 | NA     |

|                                                            |                                                                   |             |                                                                                                                          |         |      |
|------------------------------------------------------------|-------------------------------------------------------------------|-------------|--------------------------------------------------------------------------------------------------------------------------|---------|------|
|                                                            | Gene.372490<br>_csim_min-<br>ion_212540_g<br>.372490_m.37<br>2490 | A1OB3_LOXVA | Dermonecrotic<br>toxin lvsictox-al-<br>phaic1biii (Frag-<br>ment) OS=Loxosce-<br>les variegata<br>OX=571533 PE=2<br>SV=1 | 4.2E-20 | NA   |
|                                                            | Gene.423589<br>_csim_min-<br>ion_266101_g<br>.423589_m.42<br>3589 | A1IA3_LOXIN | Dermonecrotic<br>toxin lisictox-al-<br>phaia2aiii (Frag-<br>ment) OS=Loxosce-<br>les intermedia<br>OX=58218 PE=2<br>SV=1 | 8.6E-21 | NA   |
|                                                            | Gene.380591<br>_csim_min-<br>ion_220301_g<br>.380591_m.38<br>0591 | A411_LOXHI  | Dermonecrotic<br>toxin lhsictox-al-<br>phaiv1i (Fragment)<br>OS=Loxosceles hir-<br>suta OX=571525<br>PE=2 SV=1           | 1.6E-21 | NA   |
|                                                            | Gene.503547<br>_csim_min-<br>ion_382170_g<br>.503547_m.50<br>3547 | B1H_LOXLA   | Dermonecrotic<br>toxin llsictox-be-<br>taia1 OS=Loxosce-<br>les laeta OX=58217<br>PE=1 SV=1                              | 1.7E-20 | NA   |
|                                                            | Gene.290660<br>_csim_min-<br>ion_146874_g<br>.290660_m.29<br>0660 | A1I1_LOXSP  | Dermonecrotic<br>toxin lspasictox-al-<br>phaia2i (Fragment)<br>OS=Loxosceles spa-<br>dicea OX=571530<br>PE=2 SV=1        | 4E-47   | NA   |
|                                                            | Gene.387485<br>_csim_min-<br>ion_227187_g<br>.387485_m.38<br>7485 | A1IB1_LOXIN | Dermonecrotic<br>toxin lisictox-al-<br>phaia2bi OS=Lox-<br>osceles intermedia<br>OX=58218 PE=2<br>SV=1                   | 5.4E-54 | NA   |
| Dnase II family                                            | Gene.354317<br>_csim_min-<br>ion_196206_g<br>.354317_m.35<br>4317 | DNA2_ACAPL  | Plancitoxin-1<br>OS=Acanthaster<br>planci OX=133434<br>PE=1 SV=1                                                         | 1.3E-71 | 2.96 |
| Flavin mono-<br>amine oxidase<br>family. FIG1<br>subfamily | Gene.138452<br>_csim_min-<br>ion_54012_g<br>.138452_m.13<br>8452  | OXLA_MICMP  | L-amino acid oxi-<br>dase OS=Micrurus<br>mipartitus<br>OX=430902 PE=1<br>SV=1                                            | 2.3E-14 | NA   |
| Glycosyl hydro-<br>lase 56 family                          | Gene.408049<br>_csim_min-<br>ion_249149_g                         | HUGA_APIME  | Hyaluronidase<br>OS=Apis mellifera<br>OX=7460 PE=1<br>SV=1                                                               | 3.1E-18 | NA   |

|                                                               |                                                          |                    |                                                                                             |                |           |
|---------------------------------------------------------------|----------------------------------------------------------|--------------------|---------------------------------------------------------------------------------------------|----------------|-----------|
|                                                               | .408049_m.408049                                         |                    |                                                                                             |                |           |
|                                                               | Gene.399637_csim_min-ion_239919_g.399637_m.399637        | HYAL_LOXIN         | Hyaluronidase OS=Loxosceles intermedia OX=58218 PE=2 SV=1                                   | 7E-23          | NA        |
|                                                               | Gene.342583_csim_min-ion_186216_g.342583_m.342583        | HYAL1_MESMA        | Hyaluronidase-1 OS=Mesobuthus martensii OX=34649 PE=1 SV=2                                  | 4.7E-51        | NA        |
| Nucleotide pyrophosphatase/phosphodiesterase family           | Gene.10925_csim_min-ion_2435_g.10925_m.10925             | PDE_MACLB          | Venom phosphodiesterase OS=Macrovipera lebetina OX=8709 PE=1 SV=1                           | 3.2E-60        | 0.45      |
| <b>Peptidase S1 family. Snake venom subfamily</b>             | <b>Gene.450589_csim_min-ion_298071_g.450589_m.450589</b> | <b>VSPPA_GLOBR</b> | <b>Venom plasminogen activator Haly-PA OS=Gloydus brevicaudus OX=259325 PE=1 SV=2</b>       | <b>2.5E-16</b> | <b>NA</b> |
| Phospholipase A2 family                                       | Gene.437846_csim_min-ion_282313_g.437846_m.437846        | PA2_CONGI          | Phospholipase A2 A2-actitoxin-Cgg2a OS=Condylactis gigantea OX=47073 PE=1 SV=1              | 2.5E-13        | NA        |
|                                                               | Gene.441169_csim_min-ion_286288_g.441169_m.441169        | PA21_SCODE         | Phospholipase A2 SSD387 OS=Scolopendra dehaani OX=2609776 PE=1 SV=1                         | 3.9E-28        | 35.91     |
| Phospholipase A2 family. Group I subfamily. D49 sub-subfamily | Gene.524403_csim_min-ion_430111_g.524403_m.524403        | PA2A2_PSETE        | Acidic phospholipase A2 2 OS=Pseudonaja textilis OX=8673 PE=1 SV=1                          | 8E-07          | NA        |
|                                                               | Gene.518466_csim_min-ion_414418_g.518466_m.518466        | PA2B2_BUNCE        | Basic phospholipase A2 beta-bungarotoxin A2 chain OS=Bungarus caeruleus OX=132961 PE=2 SV=1 | 3E-08          | NA        |
|                                                               | Gene.466258_csim_min-ion_319116_g.466258_m.466258        | PA2A1_PSETE        | Acidic phospholipase A2 1 OS=Pseudonaja textilis OX=8673 PE=1 SV=1                          | 2.9E-09        | NA        |

|                                                                               |                                                   |              |                                                                                                            |          |        |
|-------------------------------------------------------------------------------|---------------------------------------------------|--------------|------------------------------------------------------------------------------------------------------------|----------|--------|
| Phospholipase A2 family. Group III subfamily                                  | Gene.436441_csim_min-ion_280594_g.436441_m.436441 | PA23_HELSU   | Phospholipase A2 isozymes PA3A/PA3B/PA5 OS=Heloderma suspectum OX=8554 PE=1 SV=3                           | 8.4E-30  | 2.50   |
| Phospholipase B-like family                                                   | Gene.90104_csim_min-ion_31095_g.90104_m.90104     | PLB_DRYCN    | Phospholipase-B 81 OS=Drysdalia coronoides OX=66186 PE=1 SV=1                                              | 5.3E-170 | 42.77  |
| Venom metalloproteinase (M12B) family. P-III subfamily. P-iiiia sub-subfamily | Gene.518063_csim_min-ion_413463_g.518063_m.518063 | VM3A_NAJAT   | Zinc metalloproteinase-disintegrin-like atrase-A OS=Naja atra OX=8656 PE=2 SV=1                            | 9.5E-38  | 1.11   |
| Proteinase inhibitors                                                         |                                                   |              |                                                                                                            |          |        |
| Natriuretic peptide family                                                    | Gene.299081_csim_min-ion_152562_g.299081_m.299081 | SVMII1_CERCE | Snake venom metalloprotease inhibitor 02A10 OS=Cerastes cerastes OX=8697 GN=Svmpi-Cce12 PE=1 SV=1          | 5E-07    | 226.81 |
| Venom Kunitz-type family                                                      | Gene.217819_csim_min-ion_99052_g.217819_m.217819  | VKT_ERIMA    | Kunitz-type serine protease inhibitor OS=Eristicophis macmahoni OX=110227 PE=1 SV=1                        | 5E-06    | NA     |
|                                                                               | Gene.217316_csim_min-ion_98765_g.217316_m.217316  | VKTCL_OPHHA  | Kunitz-type serine protease inhibitor OS=Ophiophagus hannah OX=8665 PE=1 SV=2                              | 2.4E-09  | 2.95   |
|                                                                               | Gene.4163_csim_min-ion_791_g.4163_m.4163          | VKT2_BITGA   | Kunitz-type serine protease inhibitor bitisilin-2 OS=Bitis gabonica OX=8694 PE=1 SV=1                      | 3.8E-19  | 1.14   |
| Venom Kunitz-type family. 03 (sub-Kunitz) subfamily                           | Gene.520922_csim_min-ion_420428_g.520922_m.520922 | VKT76_CYRHA  | Kunitz-type serine protease inhibitor HNTX-0109076 (Fragment) OS=Cyriopagopus hainanus OX=209901 PE=2 SV=1 | 1.2E-12  | 0.15   |

|                                                                                |                                                       |             |                                                                                                   |         |       |
|--------------------------------------------------------------------------------|-------------------------------------------------------|-------------|---------------------------------------------------------------------------------------------------|---------|-------|
| Venom Kunitz-type family. Sea anemone type 2 potassium channel toxin subfamily | Gene.133532<br>_csim_min-ion_51501_g.133532_m.133532  | VKT1_ANTAF  | PI-actitoxin-Axm2a OS=Anthopleura aff. Xanthogrammica OX=152178 PE=1 SV=1                         | 2E-07   | NA    |
| Ion channel inhibitor activity                                                 |                                                       |             |                                                                                                   |         |       |
| CRISP family                                                                   | Gene.212790<br>_csim_min-ion_95926_g.212790_m.212790  | CRVP_LEIMD  | Cysteine-rich venom protein LEI1 (Fragment) OS=Leioheterodon mada-gascariensis OX=46577 PE=1 SV=1 | 5.3E-09 | NA    |
|                                                                                | Gene.430137<br>_csim_min-ion_273348_g.430137_m.430137 | VA3_DINQU   | Venom allergen 3 homolog OS=Dinoponera quadriceps OX=609295 PE=2 SV=1                             | 1E-08   | NA    |
|                                                                                | Gene.405636<br>_csim_min-ion_246603_g.405636_m.405636 | CRVP_DEMVE  | Cysteine-rich venom protein OS=Demansia vestigiata OX=412038 PE=2 SV=1                            | 1.5E-12 | NA    |
|                                                                                | Gene.260819<br>_csim_min-ion_127234_g.260819_m.260819 | CRVP_PSETE  | Cysteine-rich venom protein pseudochetoxin-like OS=Pseudonaja textilis OX=8673 PE=1 SV=1          | 1.7E-12 | NA    |
|                                                                                | Gene.435671<br>_csim_min-ion_279641_g.435671_m.435671 | CRVP_TRILK  | CRISP/Allergen/PR-1 OS=Tritame loki OX=1295018 PE=1 SV=1                                          | 8.4E-15 | NA    |
|                                                                                | Gene.15278_csim_min-ion_3622_g.15278_m.15278          | CRVP_DRYCN  | Cysteine-rich venom protein OS=Drysdalia coronoides OX=66186 PE=1 SV=1                            | 5E-19   | NA    |
|                                                                                | Gene.527762<br>_csim_min-ion_440812_g.527762_m.527762 | CRVP_PSEAU  | Cysteine-rich venom protein pseudochetoxin OS=Pseudechis australis OX=8670 PE=1 SV=1              | 3.1E-24 | NA    |
|                                                                                | Gene.298733<br>_csim_min-ion_152323_g.298733_m.298733 | VA576_SCODE | Scoloptoxin SSD976 OS=Scolopendra dehaani OX=2609776 PE=1 SV=1                                    | 4.5E-29 | 73.35 |

|                                                            |                                                                   |             |                                                                                                                        |         |       |
|------------------------------------------------------------|-------------------------------------------------------------------|-------------|------------------------------------------------------------------------------------------------------------------------|---------|-------|
|                                                            | Gene.164601<br>_csim_min-<br>ion_67500_g.<br>164601_m.16<br>4601  | CRVP2_NAJKA | Cysteine-rich<br>venom protein<br>kaouthin-2<br>OS=Naja kaouthia<br>OX=8649 PE=1<br>SV=2                               | 3.4E-31 | 5.50  |
|                                                            | Gene.178202<br>_csim_min-<br>ion_75128_g.<br>178202_m.17<br>8202  | MR30_CONMR  | Cysteine-rich<br>venom protein<br>Mr30 OS=Conus<br>marmoreus<br>OX=42752 PE=1<br>SV=1                                  | 4.4E-28 | 2.02  |
|                                                            | Gene.10434_c<br>sim_min-<br>ion_2310_g.1<br>0434_m.1043<br>4      | CRVP_HOPST  | Cysteine-rich<br>venom protein<br>pseudechetoxin-<br>like OS=Hop-<br>locephalus ste-<br>phensii OX=196418<br>PE=2 SV=1 | 4.3E-30 | 16.04 |
|                                                            | Gene.353457<br>_csim_min-<br>ion_195465_g<br>.353457_m.35<br>3457 | TX31_CONTE  | Cysteine-rich<br>venom protein<br>OS=Conus textile<br>OX=6494 PE=1<br>SV=1                                             | 2.7E-31 | 1.36  |
|                                                            | Gene.305948<br>_csim_min-<br>ion_157402_g<br>.305948_m.30<br>5948 | CRVP_CERRY  | Cysteine-rich<br>venom protein<br>OS=Cerberus ryn-<br>chops OX=46267<br>PE=1 SV=1                                      | 1.8E-34 | 1.57  |
|                                                            | Gene.321837<br>_csim_min-<br>ion_169492_g<br>.321837_m.32<br>1837 | CRVP_ERYPO  | Cysteine-rich<br>venom protein<br>LIO1 (Fragment)<br>OS=Erythrolampru<br>s poecilogyrus<br>OX=338838 PE=2<br>SV=1      | 1.2E-36 | 21.73 |
| CRISP fam-<br>ily. Venom al-<br>lergen 5-like<br>subfamily | Gene.418340<br>_csim_min-<br>ion_260429_g<br>.418340_m.41<br>8340 | VA5_LYCSI   | Venom allergen 5<br>OS=Lycosa<br>singoriensis<br>OX=434756 PE=2<br>SV=1                                                | 4E-11   | NA    |
|                                                            | Gene.363965<br>_csim_min-<br>ion_204653_g<br>.363965_m.36<br>3965 | VA5_POLFU   | Venom allergen 5<br>OS=Polistes fusca-<br>tus OX=30207 PE=1<br>SV=1                                                    | 6.1E-09 | NA    |
|                                                            | Gene.147066<br>_csim_min-<br>ion_58363_g.                         | VA53_DOLMA  | Venom allergen<br>5.02 (Fragment)<br>OS=Dolichovespula                                                                 | 6.3E-15 | 0.15  |

|                                                                                |                                                                   |             |                                                                                                       |         |       |
|--------------------------------------------------------------------------------|-------------------------------------------------------------------|-------------|-------------------------------------------------------------------------------------------------------|---------|-------|
|                                                                                | 147066_m.14<br>7066                                               |             | maculata OX=7441<br>PE=1 SV=3                                                                         |         |       |
| Jellyfish toxin family. Type II subfamily                                      | Gene.464452<br>_csim_min-<br>ion_316670_g<br>.464452_m.46<br>4452 | JTX1_CARRA  | Toxin crtX-A<br>OS=Carybdea<br>rastonii OX=78582<br>PE=1 SV=1                                         | 1.7E-21 | NA    |
|                                                                                | Gene.216327<br>_csim_min-<br>ion_98149_g.<br>216327_m.21<br>6327  | JTX1_CARRA  | Toxin crtX-A<br>OS=Carybdea<br>rastonii OX=78582<br>PE=1 SV=1                                         | 2.7E-12 | NA    |
| Scoloptoxin-05 family                                                          | Gene.197801<br>_csim_min-<br>ion_86749_g.<br>197801_m.19<br>7801  | TX51A_ETHRU | U-scoloptoxin(05)-<br>Er1a OS=Eth-<br>mostigmus ru-<br>bripes OX=62613<br>PE=2 SV=1                   | 6E-08   | 3.99  |
| Scoloptoxin-11 family                                                          | Gene.397028<br>_csim_min-<br>ion_237164_g<br>.397028_m.39<br>7028 | TXB3A_SCODE | U-scoloptoxin(11)-<br>Ssd3a OS=Scolo-<br>pendra dehaani<br>OX=2609776 PE=1<br>SV=1                    | 3E-07   | 0.09  |
| Sea anemone type 5 potassium channel toxin family                              | Gene.517497<br>_csim_min-<br>ion_412076_g<br>.517497_m.51<br>7497 | KV51_METSE  | U-metritoxin-<br>Msn2a OS=Metrid-<br>ium senile OX=6116<br>PE=3 SV=1                                  | 1.1E-15 | 66.35 |
|                                                                                | Gene.496728<br>_csim_min-<br>ion_368326_g<br>.496728_m.49<br>6728 | KV53_BUNCI  | Kappa-actitoxin-<br>Bcs4a OS=Bu-<br>nodosoma cais-<br>sarum OX=31165<br>PE=1 SV=1                     | 2.4E-19 | 1.41  |
| Venom Kunitz-type family. Sea anemone type 2 potassium channel toxin subfamily | Gene.323953<br>_csim_min-<br>ion_171126_g<br>.323953_m.32<br>3953 | VKTG_ANEVI  | U-actitoxin-Avd3s<br>(Fragment)<br>OS=Anemonia vi-<br>ridis OX=51769<br>PE=2 SV=1                     | 2.8E-10 | NA    |
| Hemostasis impairing toxin                                                     |                                                                   |             |                                                                                                       |         |       |
| Ficolin lectin family. Veficolin subfamily                                     | Gene.445543<br>_csim_min-<br>ion_291627_g<br>.445543_m.4<br>45543 | FCNV3_CERRY | Ryncolin-3<br>OS=Cerberus ryn-<br>chops OX=46267<br>PE=1 SV=1                                         | 8.4E-33 | 1.11  |
| Snaclec family                                                                 | Gene.355855<br>_csim_min-<br>ion_197543_g<br>.355855_m.35<br>5855 | SLAB3_TRIST | Snaclec stejaggre-<br>gin-A subunit beta-<br>3 OS=Trimeresurus<br>stejnegeri<br>OX=39682 PE=2<br>SV=1 | 2.9E-12 | NA    |

|                             |                                                                   |             |                                                                                                                                 |         |       |
|-----------------------------|-------------------------------------------------------------------|-------------|---------------------------------------------------------------------------------------------------------------------------------|---------|-------|
|                             | Gene.14062_c<br>sim_min-<br>ion_3288_g.1<br>4062_m.1406<br>2      | SLEB_CALRH  | Snaclec rhodocetin<br>subunit beta<br>OS=Calloselasma<br>rhodostoma<br>OX=8717 PE=1<br>SV=1                                     | 3E-06   | 0.11  |
|                             | Gene.424617<br>_csim_min-<br>ion_267267_g<br>.424617_m.42<br>4617 | SLB2_MACLB  | Snaclec B2<br>OS=Macrovipera le-<br>betina OX=8709<br>PE=2 SV=1                                                                 | 4E-07   | 1.25  |
|                             | Gene.96560_c<br>sim_min-<br>ion_33927_g.<br>96560_m.965<br>60     | SLLC2_MACLB | Snaclec coagulation<br>factor X-activating<br>enzyme light chain<br>2 OS=Macrovipera<br>lebetina OX=8709<br>GN=LC2 PE=1<br>SV=1 | 3E-08   | 4.44  |
|                             | Gene.67427_c<br>sim_min-<br>ion_21579_g.<br>67427_m.674<br>27     | SLLC2_DABSI | Snaclec coagulation<br>factor X-activating<br>enzyme light chain<br>2 OS=Daboia sia-<br>mensis OX=343250<br>GN=LC2 PE=1<br>SV=1 | 8.6E-09 | NA    |
| SNTX/VTX<br>toxin family    | Gene.45640_c<br>sim_min-<br>ion_13412_g.<br>45640_m.456<br>40     | STXA_SYNVE  | Neoverrucotoxin<br>subunit alpha<br>OS=Synanceia ver-<br>rucosa OX=51996<br>PE=1 SV=1                                           | 7.2E-15 | NA    |
|                             | Gene.19568_c<br>sim_min-<br>ion_4884_g.1<br>9568_m.1956<br>8      | CTXB_SCOPL  | Cytolytic toxin-beta<br>OS=Scorpaena<br>plumieri<br>OX=274700 PE=1<br>SV=1                                                      | 1.4E-19 | 0.09  |
|                             | Gene.429229<br>_csim_min-<br>ion_272364_g<br>.429229_m.42<br>9229 | STXB_SYNVE  | Neoverrucotoxin<br>subunit beta<br>OS=Synanceia ver-<br>rucosa OX=51996<br>PE=1 SV=1                                            | 2.8E-27 | 1.56  |
|                             | Gene.17739_c<br>sim_min-<br>ion_4362_g.1<br>7739_m.1773<br>9      | CTXA_SCOPL  | Cytolytic toxin-al-<br>pha OS=Scorpaena<br>plumieri<br>OX=274700 PE=1<br>SV=1                                                   | 3.7E-52 | 64.77 |
| True venom<br>lectin family | Gene.200635<br>_csim_min-<br>ion_88492_g.<br>200635_m.20<br>0635  | LECG1_BUNFA | C-type lectin bfl-1<br>OS=Bungarus fasci-<br>atus OX=8613 PE=2<br>SV=1                                                          | 6E-07   | NA    |



|                                                            |                                                                   |             |                                                                                                                     |         |       |
|------------------------------------------------------------|-------------------------------------------------------------------|-------------|---------------------------------------------------------------------------------------------------------------------|---------|-------|
|                                                            | Gene.381021<br>_csim_min-<br>ion_220751_g<br>.381021_m.38<br>1021 | LECM2_BUNMU | C-type lectin BML-<br>2 OS=Bungarus<br>multicinctus<br>OX=8616 PE=1<br>SV=1                                         | 5E-08   | NA    |
|                                                            | Gene.347148<br>_csim_min-<br>ion_190074_g<br>.347148_m.34<br>7148 | LECM1_HYDHA | C-type lectin 1<br>OS=Hydrophis<br>hardwickii<br>OX=8781 PE=2<br>SV=1                                               | 2E-08   | 5.66  |
| Other toxins candidates                                    |                                                                   |             |                                                                                                                     |         |       |
| AVIT (prokinet-<br>icin) family                            | Gene.306077<br>_csim_min-<br>ion_157513_g<br>.306077_m.30<br>6077 | MIT1_DENPO  | Toxin MIT1<br>OS=Dendroaspis<br>polylepis polylepis<br>OX=8620 PE=1<br>SV=3                                         | 1E-08   | NA    |
| EGF-like, Sushi,<br>TSP type-1,<br>LDL-receptor<br>class A | Gene.154083<br>_csim_min-<br>ion_61961_g.<br>154083_m.15<br>4083  | CTX_SEPES   | SE-cephalotoxin<br>OS=Sepia esculenta<br>OX=31210 PE=1<br>SV=1                                                      | 1.6E-35 | 1.30  |
| Elevenin-like                                              | Gene.291057<br>_csim_min-<br>ion_147124_g<br>.291057_m.29<br>1057 | CELE_CONVC  | Elevenin-Vc1<br>OS=Conus victoriae<br>OX=319920 PE=1<br>SV=1                                                        | 3E-07   | NA    |
| IGFBP N-termi-<br>nal, Kazal-like,<br>Ig-like C2-type      | Gene.254428<br>_csim_min-<br>ion_123013_g<br>.254428_m.25<br>4428 | IGFBP_CUPSA | Insulin-like growth<br>factor-binding pro-<br>tein-related protein<br>1 OS=Cupiennius<br>salei OX=6928 PE=2<br>SV=1 | 4.6E-62 | 15.78 |
| Venom comple-<br>ment C3 homo-<br>log family               | Gene.461311<br>_csim_min-<br>ion_312333_g<br>.461311_m.46<br>1311 | VCO32_AUSSU | A.superbus venom<br>factor 2 OS=Austre-<br>laps superbus<br>OX=29156 PE=2<br>SV=1                                   | 2.8E-13 | NA    |

**Table S4.** Toxin transcripts of *Tubulanus polymorphus*. Unique toxins families are shown in bold.

| Protein family                                 | Transcript ID                              | Uniprot accession | Description                                                                  | E-value | Expression, TPM |
|------------------------------------------------|--------------------------------------------|-------------------|------------------------------------------------------------------------------|---------|-----------------|
| Pore-forming toxins                            |                                            |                   |                                                                              |         |                 |
| Actinoporin fam-<br>ily. Conoidea<br>subfamily | Gene.32873_r<br>_15596_g.328<br>73_m.32873 | ACTP1_TERAN       | Tereporin-Ca1<br>(Fragment) OS=Ter-<br>ebra anilis<br>OX=553697 PE=2<br>SV=1 | 5.4E-36 | 62.64           |
| Enzymes                                        |                                            |                   |                                                                              |         |                 |

|                                                                               |                                       |                    |                                                                                                       |                 |             |
|-------------------------------------------------------------------------------|---------------------------------------|--------------------|-------------------------------------------------------------------------------------------------------|-----------------|-------------|
| Arthropod phospholipase D family. Class II subfamily                          | Gene.48334_r_35867_g.48334_m.48334    | B1T1_LOXSN         | Dermonecrotic toxin Ispisictox-betaie3i (Fragment)<br>OS=Loxosceles spinulosa OX=571532<br>PE=2 SV=1  | 4.5E-12         | 13.49       |
|                                                                               | Gene.40754_r_23774_g.40754_m.40754    | B1R2_LOXSN         | Dermonecrotic toxin Ispisictox-betaie1ii (Fragment)<br>OS=Loxosceles spinulosa OX=571532<br>PE=2 SV=1 | 7.3E-15         | 9.10        |
|                                                                               | Gene.31713_r_14663_g.31713_m.31713    | A412_LOXHI         | Dermonecrotic toxin Ihsictox-alphaiv1ii (Fragment)<br>OS=Loxosceles hirsuta OX=571525<br>PE=2 SV=1    | 1.2E-41         | 6.59        |
|                                                                               | Gene.27650_r_11664_g.27650_m.27650    | A1O_LOXGA          | Dermonecrotic toxin Igsictox-alphaic1 OS=Loxosceles gaucho OX=58216 PE=1<br>SV=1                      | 4.8E-48         | 4.84        |
| Arthropod phospholipase D family. Class II subfamily. Class iia sub-subfamily | Gene.20564_r_7470_g.20564_m.20564     | A51_LOXIN          | Dermonecrotic toxin Iisictox-alphaiv1 OS=Loxosceles intermedia OX=58218 PE=1<br>SV=1                  | 3.6E-48         | 375.93      |
| Dnase II family                                                               | Gene.21807_r_8136_g.21807_m.21807     | DNA2_ACAPL         | Plancitoxin-1 OS=Acanthaster planci OX=133434<br>PE=1 SV=1                                            | 3.2E-70         | 22.11       |
| <b>GGT_peptidase domain</b>                                                   | <b>Gene.7717_r_1895_g.7717_m.7717</b> | <b>TX14A_SCODE</b> | <b>Scoloptoxin SSD14 OS=Scolopendra dehaani OX=2609776 PE=1 SV=1</b>                                  | <b>2.2E-154</b> | <b>4.21</b> |
| Glutaminyl-peptide cyclotransferase family                                    | Gene.45237_r_30379_g.45237_m.45237    | QPCT_BOIDE         | Glutaminyl-peptide cyclotransferase OS=Boiga dendrophila OX=46286<br>GN=QPCT PE=2 SV=1                | 4.4E-10         | 8.08        |
| Natterin family                                                               | Gene.36879_r_19297_g.36879_m.36879    | NATT3_THANI        | Natterin-3 OS=Thalasophryne nattereri OX=289382 PE=1<br>SV=1                                          | 3E-12           | 4.58        |

|                                                                              |                                            |             |                                                                                                                                     |         |       |
|------------------------------------------------------------------------------|--------------------------------------------|-------------|-------------------------------------------------------------------------------------------------------------------------------------|---------|-------|
|                                                                              | Gene.25133_r<br>_10065_g.251<br>33_m.25133 | NATT4_THANI | Natterin-4<br>OS=Thalas-<br>sophryne nattereri<br>OX=289382 PE=2<br>SV=1                                                            | 6E-16   | 6.23  |
| Phospholipase<br>A2 family                                                   | Gene.36857_r<br>_19278_g.368<br>57_m.36857 | PA2_URTCR   | Phospholipase A2<br>A2-actitoxin-Ucs2a<br>OS=Urticina crassi-<br>cornis OX=45621<br>PE=1 SV=1                                       | 7.1E-22 | 57.12 |
|                                                                              | Gene.11763_r<br>_3435_g.1176<br>3_m.11763  | PA2_SCOVI   | Phospholipase A2<br>Scol/Pla OS=Scolo-<br>pendra viridis<br>OX=118503 PE=1<br>SV=1                                                  | 1.2E-23 | 17.73 |
|                                                                              | Gene.34244_r<br>_16760_g.342<br>44_m.34244 | PA21_SCODE  | Phospholipase A2<br>SSD387 OS=Scolo-<br>pendra dehaani<br>OX=2609776 PE=1<br>SV=1                                                   | 2.1E-29 | 9.31  |
| Phospholipase<br>A2 fam-<br>ily. Group I<br>subfamily. D49<br>sub-subfamily  | Gene.20339_r<br>_7345_g.2033<br>9_m.20339  | PA2HB_OXYSC | Neutral phospho-<br>lipase A2 homolog<br>taipoxin beta chain<br>1 OS=Oxyuranus<br>scutellatus scutella-<br>tus OX=8667 PE=1<br>SV=2 | 6.3E-19 | 40.41 |
|                                                                              | Gene.38345_r<br>_20954_g.383<br>45_m.38345 | PA2A6_TROCA | Acidic phospho-<br>lipase A2 6<br>OS=Tropidechis<br>carinatus<br>OX=100989 PE=2<br>SV=1                                             | 2E-21   | 35.95 |
|                                                                              | Gene.37234_r<br>_19686_g.372<br>34_m.37234 | PA22_OXYSC  | Phospholipase A2<br>OS2 OS=Oxyuranus<br>scutellatus scutella-<br>tus OX=8667 PE=1<br>SV=2                                           | 4.3E-23 | 35.72 |
|                                                                              | Gene.26820_r<br>_11136_g.268<br>20_m.26820 | PA2B_MICCO  | Basic phospho-<br>lipase A2 OS=Mi-<br>crurus corallinus<br>OX=54390 PE=1<br>SV=1                                                    | 4.8E-25 | 27.75 |
| Phospholipase<br>A2 fam-<br>ily. Group II<br>subfamily. D49<br>sub-subfamily | Gene.33600_r<br>_16227_g.336<br>00_m.33600 | PA2BA_CRODU | Phospholipase A2<br>crotoxin basic chain<br>cba2 OS=Crotalus<br>durissus terrificus<br>OX=8732 PE=1<br>SV=1                         | 8.3E-17 | 24.36 |

|                                                                              |                                    |             |                                                                                                                 |         |        |
|------------------------------------------------------------------------------|------------------------------------|-------------|-----------------------------------------------------------------------------------------------------------------|---------|--------|
|                                                                              | Gene.40578_r_23581_g.40578_m.40578 | PA2B2_DABRR | Basic phospholipase A2 Drk-b2<br>OS=Daboia russelii<br>OX=8707 PE=1<br>SV=1                                     | 4E-21   | 16.13  |
| Phospholipase A2 family. Group III subfamily                                 | Gene.9410_r_2486_g.9410_m.9410     | PA23_HELSU  | Phospholipase A2 isozymes<br>PA3A/PA3B/PA5<br>OS=Heloderma suspectum<br>OX=8554 PE=1<br>SV=3                    | 1.1E-19 | 23.19  |
| Phospholipase B-like family                                                  | Gene.7245_r_1736_g.7245_m.7245     | PLB_DRYCN   | Phospholipase-B 81<br>OS=Drysdalia coronoides<br>OX=66186<br>PE=1 SV=1                                          | 0       | 12.37  |
| Venom metalloproteinase (M12B) family. P-III subfamily                       | Gene.8763_r_2255_g.8763_m.8763     | VM38_DRYCN  | Zinc metalloproteinase-disintegrin-like MTP8<br>OS=Drysdalia coronoides<br>OX=66186<br>PE=1 SV=1                | 4.4E-70 | 15.46  |
| Venom metalloproteinase (M12B) family. P-III subfamily. P-iiia sub-subfamily | Gene.15411_r_4963_g.15411_m.15411  | VM3K_NAJKA  | Hemorrhagic metalloproteinase-disintegrin-like kaouthiagin<br>OS=Naja kaouthia<br>OX=8649 PE=1<br>SV=1          | 1.8E-33 | 150.29 |
| Proteinase inhibitors                                                        |                                    |             |                                                                                                                 |         |        |
| Venom Kunitz-type family                                                     | Gene.40270_r_23201_g.40270_m.40270 | VKT3_PSETT  | Kunitz-type serine protease inhibitor textilinin-3<br>OS=Pseudonaja textilis textilis<br>OX=169397 PE=2<br>SV=1 | 1.2E-12 | 10.68  |
|                                                                              | Gene.46405_r_32385_g.46405_m.46405 | VKT1_VIPAA  | Kunitz-type serine protease inhibitor 1<br>OS=Vipera ammodytes ammodytes<br>OX=8705 PE=1<br>SV=2                | 2.2E-18 | 41.66  |
| Ion channel inhibitor activity                                               |                                    |             |                                                                                                                 |         |        |
| CRISP family                                                                 | Gene.53044_r_45762_g.53044_m.53044 | CRVP_OPHHA  | Cysteine-rich venom protein ophanin<br>OS=Ophiophagus hannah<br>OX=8665 PE=1<br>SV=1                            | 5.9E-06 | 15.44  |

|                                                                                                |                                        |             |                                                                                         |         |        |
|------------------------------------------------------------------------------------------------|----------------------------------------|-------------|-----------------------------------------------------------------------------------------|---------|--------|
|                                                                                                | Gene.33069_r<br>_15764_g.33069_m.33069 | VA3_SOLIN   | Venom allergen 3<br>OS=Solenopsis<br>invicta OX=13686<br>PE=1 SV=2                      | 2.7E-31 | 32.60  |
|                                                                                                | Gene.22507_r<br>_8513_g.22507_m.22507  | MR30_CONMR  | Cysteine-rich<br>venom protein<br>Mr30 OS=Conus<br>marmoreus<br>OX=42752 PE=1<br>SV=1   | 1.3E-33 | 15.77  |
|                                                                                                | Gene.25045_r<br>_10009_g.25045_m.25045 | CRVP_TRILK  | CRISP/Aller-<br>gen/PR-1 OS=Trit-<br>tame loki<br>OX=1295018 PE=1<br>SV=1               | 1.4E-35 | 19.85  |
| CRISP fam-<br>ily. Venom al-<br>lergen 5-like<br>subfamily                                     | Gene.44509_r<br>_29206_g.44509_m.44509 | VA5_POLDO   | Venom allergen 5<br>OS=Polistes domi-<br>nula OX=743375<br>PE=1 SV=2                    | 3.9E-08 | 20.85  |
|                                                                                                | Gene.44041_r<br>_28460_g.44041_m.44041 | VA5_VESMG   | Venom allergen 5<br>OS=Vespa mag-<br>nifica OX=202807<br>PE=1 SV=2                      | 1.4E-08 | 4.36   |
|                                                                                                | Gene.21335_r<br>_7884_g.21335_m.21335  | VA576_SCODE | Scoloptoxin SSD976<br>OS=Scolopendra<br>dehaani<br>OX=2609776 PE=1<br>SV=1              | 1.9E-26 | 63.60  |
| Venom Kunitz-<br>type family. Sea<br>anemone type 2<br>potassium<br>channel toxin<br>subfamily | Gene.37385_r<br>_19844_g.37385_m.37385 | VKT9_ANEVI  | U-actitoxin-Avd3l<br>OS=Anemonia vi-<br>ridis OX=51769<br>PE=3 SV=1                     | 8E-15   | 151.04 |
|                                                                                                | Gene.35073_r<br>_17541_g.35073_m.35073 | VKT7_ANEVI  | U-actitoxin-Avd3j<br>OS=Anemonia vi-<br>ridis OX=51769<br>PE=3 SV=1                     | 2.5E-16 | 8.85   |
| Sea anemone<br>type 5 potas-<br>sium channel<br>toxin family                                   | Gene.48662_r<br>_36543_g.48662_m.48662 | KV51_METSE  | U-metritoxin-<br>Msn2a OS=Metrid-<br>ium senile OX=6116<br>PE=3 SV=1                    | 2.1E-07 | 76.57  |
| Scoloptoxin-11<br>family                                                                       | Gene.47169_r<br>_33709_g.47169_m.47169 | TX14B_SCODE | Scoloptoxin SSD20<br>(Fragment)<br>OS=Scolopendra<br>dehaani<br>OX=2609776 PE=1<br>SV=1 | 1.9E-20 | 16.02  |
| Hemostasis impairing toxin                                                                     |                                        |             |                                                                                         |         |        |
| Snaclec family                                                                                 | Gene.46142_r<br>_31919_g.46142_m.46142 | SLB9_MACLB  | Snaclec B9<br>OS=Macrovipera le-<br>betina OX=8709<br>PE=2 SV=1                         | 6.1E-09 | 8.78   |

|                                                      |                                            |                   |                                                                                                    |                |              |
|------------------------------------------------------|--------------------------------------------|-------------------|----------------------------------------------------------------------------------------------------|----------------|--------------|
|                                                      | Gene.36055_r<br>_18475_g.36055_m.36055     | SL3_SISCA         | Snaclec 3 OS=Sistrurus catenatus edwardsii OX=8762 PE=2 SV=1                                       | 4.1E-11        | 356.96       |
| SNTX/VTX toxin family                                | Gene.34675_r<br>_17159_g.34675_m.34675     | CTXB_SCOPL        | Cytolytic toxin-beta OS=Scorpaena plumieri OX=274700 PE=1 SV=1                                     | 1.9E-21        | 8.53         |
| Other toxins                                         |                                            |                   |                                                                                                    |                |              |
| AVIT (prokineticin) family                           | Gene.36658_r<br>_19081_g.36658_m.36658     | VP164_LYCMC       | Venom protein 164 OS=Lychas mucronatus OX=172552 PE=3 SV=1                                         | 3.9E-06        | 6.71         |
|                                                      | Gene.28814_r<br>_12460_g.28814_m.28814     | BM8D_BOMMX        | Prokineticin Bm8-d OS=Bombina maxima OX=161274 PE=2 SV=1                                           | 1.6E-06        | 19.34        |
| Conocap-like                                         | Gene.27537_r<br>_11591_g.27537_m.27537     | CCAP_CONVL        | Conocap OS=Conus viliepinii OX=257347 GN=conocap PE=1 SV=1                                         | 1.1E-06        | 4.01         |
| <b>Endothelin/sarafotoxin family</b>                 | <b>Gene.8413_r<br/>_2134_g.8413_m.8413</b> | <b>SRTX_ATREN</b> | <b>Sarafotoxins=At-ractaspis en-gaddensis OX=1343144 PE=1 SV=2</b>                                 | <b>8.5E-09</b> | <b>53.05</b> |
| IGFBP N-terminal domain, Kazal-like, Ig-like C2-type | Gene.26911_r<br>_11196_g.26911_m.26911     | IGFBP_CUPSA       | Insulin-like growth factor-binding protein-related protein 1 OS=Cupiennius salei OX=6928 PE=2 SV=1 | 1.1E-60        | 281.21       |
| PDGF/VEGF growth factor family                       | Gene.10036_r<br>_2731_g.10036_m.10036      | VEGFA_BITGA       | Vascular endothelial growth factor A OS=Bitis gabonica OX=8694 PE=1 SV=1                           | 1.2E-08        | 32.39        |
| Venom complement C3 homolog family                   | Gene.48677_r<br>_36574_g.48677_m.48677     | VCO3_OPHHA        | Ophiophagus venom factor OS=Ophiophagus hannah OX=8665 PE=1 SV=1                                   | 5.6E-15        | 12.49        |

Table S5. Toxin transcripts of *Baseodiscus unicolor*. Unique toxins families are shown in bold.

| Protein family      | Transcript ID | Uniprot accession | Description | E-value | Expression, TPM |
|---------------------|---------------|-------------------|-------------|---------|-----------------|
| Pore-forming toxins |               |                   |             |         |                 |

|                                                                |                                                  |             |                                                                                                |         |        |
|----------------------------------------------------------------|--------------------------------------------------|-------------|------------------------------------------------------------------------------------------------|---------|--------|
| MACPF domain                                                   | Gene.67601_B_uni-color_11432_g.67601_m.67601     | PV21_POMMA  | Perivitellin-2 67 kda subunit<br>OS=Pomacea maculata OX=1245466<br>PE=1 SV=1                   | 5.6E-90 | 12.26  |
| Enzymes                                                        |                                                  |             |                                                                                                |         |        |
| Arthropod phospholipase D family. Class II subfamily           | Gene.134482_B_uni-color_60655_g.134482_m.134482  | A411_LOXLA  | Dermonecrotic toxin IIsictox-alphaiv1i (Fragment)<br>OS=Loxosceles laeta OX=58217<br>PE=2 SV=1 | 5.5E-23 | 2.46   |
|                                                                | Gene.121778_B_uni-color_43745_g.121778_m.121778  | A4A1_LOXIN  | Dermonecrotic toxin IIsictox-alphaiva1 OS=Loxosceles intermedia OX=58218 PE=1 SV=1             | 1E-24   | 22.20  |
|                                                                | Gene.105966_B_uni-color_29654_g.105966_m.105966  | A51_LOXIN   | Dermonecrotic toxin IIsictox-alphaiv1 OS=Loxosceles intermedia OX=58218 PE=1 SV=1              | 6.5E-45 | 143.78 |
| Dnase II family                                                | Gene.74427_B_uni-color_13659_g.74427_m.74427     | DNA2_ACAPL  | Plancitoxin-1<br>OS=Acanthaster planci OX=133434<br>PE=1 SV=1                                  | 2.5E-89 | 3.00   |
| Flavin monoamine oxidase family. FIG1 subfamily                | Gene.49406_B_uni-color_6706_g.49406_m.49406      | OXLA_VIPAA  | L-amino-acid oxidase OS=Vipera ammodytes ammodytes OX=8705<br>PE=1 SV=1                        | 2.2E-44 | 5.69   |
| Natterin family                                                | Gene.90302_B_uni-color_20347_g.90302_m.90302     | NATT3_THANI | Natterin-3<br>OS=Thalasiosophryne nattereri OX=289382 PE=1 SV=1                                | 3.9E-06 | 1.84   |
| Phospholipase A2 family                                        | Gene.124081_B_uni-color_46290_g.124081_m.124081  | PA21_SCODE  | Phospholipase A2 SSD387 OS=Scolopendra dehaani OX=2609776 PE=1 SV=1                            | 2.3E-23 | 8.12   |
| Phospholipase A2 family. Group II subfamily. D49 sub-subfamily | Gene.155914_B_uni-color_110324_g.155914_m.155914 | PA2B_VIPAZ  | Basic phospholipase A2 B chain<br>OS=Vipera aspis zinnikeri OX=55427<br>PE=1 SV=1              | 6.6E-16 | 1.36   |

|                                              |                                                 |             |                                                                                                                        |         |       |
|----------------------------------------------|-------------------------------------------------|-------------|------------------------------------------------------------------------------------------------------------------------|---------|-------|
| Phospholipase A2 family. Group III subfamily | Gene.67828_B_uni-color_11496_g.67828_m.67828    | PA23_HELSEU | Phospholipase A2 isozymes PA3A/PA3B/PA5 OS=Heloderma suspectum OX=8554 PE=1 SV=3                                       | 1.8E-34 | 5.25  |
| Phospholipase B-like family                  | Gene.41256_B_uni-color_5044_g.41256_m.41256     | PLB_DRYCN   | Phospholipase-B 81 OS=Drysdalia coronoides OX=66186 PE=1 SV=1                                                          | 0       | 1.32  |
| Proteinase inhibitors                        |                                                 |             |                                                                                                                        |         |       |
| Venom Kunitz-type family                     | Gene.116042_B_uni-color_37940_g.116042_m.116042 | VKT1B_CONCL | Kunitz-type serine protease inhibitor conotoxin Cal9.1b (Fragment) OS=Californiconus californicus OX=1736779 PE=2 SV=1 | 5.5E-17 | 9.08  |
|                                              | Gene.112285_B_uni-color_34627_g.112285_m.112285 | VKT1_WALAE  | Protease inhibitor 1 OS=Walterinnesia aegyptia OX=64182 PE=1 SV=1                                                      | 2.2E-14 | 28.02 |
|                                              | Gene.128801_B_uni-color_52271_g.128801_m.128801 | VKT_BOMTE   | Kunitz-type serine protease inhibitor Bt-KTI OS=Bombus terrestris OX=30195 PE=2 SV=1                                   | 3.2E-16 | 11.22 |
|                                              | Gene.135598_B_uni-color_62534_g.135598_m.135598 | VKT1A_CONCL | Kunitz-type serine protease inhibitor conotoxin Cal9.1a OS=Californiconus californicus OX=1736779 PE=2 SV=1            | 5.8E-16 | 87.26 |
|                                              | Gene.67501_B_uni-color_11401_g.67501_m.67501    | VKT2_BITGA  | Kunitz-type serine protease inhibitor bitisilin-2 OS=Bitis gabonica OX=8694 PE=1 SV=1                                  | 2.7E-14 | 31.10 |
|                                              | Gene.134404_B_uni-color_60534_g.134404_m.134404 | VKT1C_CONCL | Kunitz-type serine protease inhibitor conotoxin Cal9.1c (Fragment) OS=Californiconus californicus OX=1736779 PE=2 SV=1 | 3.5E-17 | 10.94 |



|                                                                                |                                                  |             |                                                                                    |         |        |
|--------------------------------------------------------------------------------|--------------------------------------------------|-------------|------------------------------------------------------------------------------------|---------|--------|
| Venom Kunitz-type family. Sea anemone type 2 potassium channel toxin subfamily | Gene.110156_B_uni-color_32810_g.110156_m.110156  | ATPI1_ACTTE | Actinia tenebrosa protease inhibitors OS=Actinia tenebrosa OX=6105 PE=1 SV=1       | 3.3E-48 | 129.66 |
| Ion channel inhibitor activity                                                 |                                                  |             |                                                                                    |         |        |
| CRISP family                                                                   | Gene.68366_B_uni-color_11667_g.68366_m.68366     | CRVP_LATSE  | Cysteine-rich venom protein latisemin OS=Latisemina semifasciata OX=8631 PE=2 SV=1 | 6.6E-26 | 0.82   |
|                                                                                | Gene.48770_B_uni-color_6564_g.48770_m.48770      | CRVP_OPHHA  | Cysteine-rich venom protein ophanin OS=Ophiophagus hannah OX=8665 PE=1 SV=1        | 2.9E-18 | 2.02   |
| CRISP family. Venom allergen 5-like subfamily                                  | Gene.53702_B_uni-color_7686_g.53702_m.53702      | VA576_SCODE | Scoloptoxin SSD976 OS=Scolopendra dehaani OX=2609776 PE=1 SV=1                     | 2.8E-27 | 2.07   |
| Scoloptoxin-11 family                                                          | Gene.59910_B_uni-color_9247_g.59910_m.59910      | TX14B_SCODE | Scoloptoxin SSD20 (Fragment) OS=Scolopendra dehaani OX=2609776 PE=1 SV=1           | 1.6E-11 | 1.39   |
|                                                                                | Gene.75161_B_uni-color_13935_g.75161_m.75161     | TXB3A_SCODE | U-scoloptoxin(11)-Ssd3a OS=Scolopendra dehaani OX=2609776 PE=1 SV=1                | 6.2E-06 | 2.85   |
| Hemostasis impairing toxin                                                     |                                                  |             |                                                                                    |         |        |
| Snaclec family                                                                 | Gene.158425_B_uni-color_118108_g.158425_m.158425 | SL6_DABSI   | Snaclec 6 OS=Daboia siamensis OX=343250 PE=2 SV=1                                  | 2.2E-09 | 1.90   |
|                                                                                | Gene.148898_B_uni-color_90567_g.148898_m.148898  | SLRB_BITRH  | Snaclec rhinocetin subunit beta OS=Bitis rhinoceros OX=715877 PE=1 SV=1            | 5.7E-12 | 1.02   |
|                                                                                | Gene.72526_B_uni-color_13001_g.72526_m.72526     | SLAB_BOTJA  | Snaclec bothrojaracin subunit beta OS=Bothrops jararaca OX=8724 PE=1 SV=1          | 4.3E-10 | 3.63   |

|                                                      |                                                        |                    |                                                                                                          |                |             |
|------------------------------------------------------|--------------------------------------------------------|--------------------|----------------------------------------------------------------------------------------------------------|----------------|-------------|
| SNTX/VTX toxin family                                | Gene.30482_B_uni-color_3180_g.30482_m.30482            | STXA_SYNHO         | Stonustoxin subunit alpha<br>OS=Synanceia horrida OX=13279<br>PE=1 SV=3                                  | 6.2E-87        | 1.31        |
|                                                      | Gene.132857_B_uni-color_58073_g.132857_m.132857        | STXB_SYNVE         | Neoverrucotoxin subunit beta<br>OS=Synanceia verrucosa OX=51996<br>PE=1 SV=1                             | 4.9E-53        | 0.95        |
| True venom lectin family                             | Gene.124185_B_uni-color_46399_g.124185_m.124185        | LECM1_HYDHA        | C-type lectin 1<br>OS=Hydrophis hardwickii<br>OX=8781 PE=2<br>SV=1                                       | 1.1E-11        | 1.15        |
| Other toxins candidates                              |                                                        |                    |                                                                                                          |                |             |
| IGFBP N-terminal domain, Kazal-like, Ig-like C2-type | Gene.73465_B_uni-color_13314_g.73465_m.73465           | IGFBP_CUPSA        | Insulin-like growth factor-binding protein-related protein 1<br>OS=Cupiennius salei OX=6928 PE=2<br>SV=1 | 2E-56          | 47.56       |
| <b>Insulin-like growth factor binding</b>            | <b>Gene.133104_B_uni-color_58427_g.133104_m.133104</b> | <b>VP302_LYCMC</b> | <b>Venom protein 302</b><br>OS=Lychas mucronatus OX=172552<br>PE=2 SV=1                                  | <b>1.2E-12</b> | <b>1.74</b> |
| Glycoprotein hormones subunit alpha family           | Gene.161711_B_uni-color_129356_g.161711_m.161711       | CTHA2_CONVC        | Thyrostimulin alpha-2 subunit<br>OS=Conus victoriae<br>OX=319920 PE=1<br>SV=1                            | 9.3E-12        | 2.69        |
| LDL-receptor class A domain                          | Gene.79949_B_uni-color_15712_g.79949_m.79949           | CPROH_CONVC        | Neuropeptide prohormone-4<br>OS=Conus victoriae<br>OX=319920 PE=1<br>SV=1                                | 4.1E-24        | 15.45       |

Table S6. Toxin transcripts of *Hubrechtella iijimai*. Unique toxins families are shown in bold.

| Protein family                 | Transcript ID                              | Uniprot accession | Description                                                        | E-value | Expression, TPM |
|--------------------------------|--------------------------------------------|-------------------|--------------------------------------------------------------------|---------|-----------------|
| Neurotoxins                    |                                            |                   |                                                                    |         |                 |
| Conopeptide P-like superfamily | Gene.85849_h_iijimai_63935_g.85849_m.85849 | TU92_POLAB        | Turriptide Pal9.2<br>OS=Polystira albida<br>OX=394106 PE=2<br>SV=1 | 5.3E-10 | 1.66            |
| Pore-forming toxins            |                                            |                   |                                                                    |         |                 |

|                                                                               |                                           |             |                                                                                            |         |       |
|-------------------------------------------------------------------------------|-------------------------------------------|-------------|--------------------------------------------------------------------------------------------|---------|-------|
| Actinoporin family. Conoidea subfamily                                        | Gene.48764_h_ijimai_18798_g.48764_m.48764 | ACTP_CONCN  | Conoporin-Cn1 OS=Conus consors OX=101297 PE=1 SV=1                                         | 4.7E-06 | 4.42  |
| Cytotoxin A-III - like                                                        | Gene.57253_h_ijimai_26396_g.57253_m.57253 | CXA3_CERLA  | Cytotoxin A-III OS=Cerebratulus lacteus OX=6221 PE=1 SV=1                                  | 4.9E-09 | 9.23  |
| MACPF domain                                                                  | Gene.16805_h_ijimai_3077_g.16805_m.16805  | PV21_POMMA  | Perivitellin-2 67 kda subunit OS=Pomacea maculata OX=1245466 PE=1 SV=1                     | 3E-74   | 8.88  |
| Enzymes                                                                       |                                           |             |                                                                                            |         |       |
| Arthropod phospholipase D family. Class II subfamily                          | Gene.38018_h_ijimai_11669_g.38018_m.38018 | A1H2_LOXHI  | Dermonecrotic toxin lhsictox-alpha1ii (Fragment) OS=Loxosceles hirsuta OX=571525 PE=2 SV=1 | 1.3E-47 | 50.05 |
| Arthropod phospholipase D family. Class II subfamily. Class iia sub-subfamily | Gene.53539_h_ijimai_22853_g.53539_m.53539 | A51_LOXIN   | Dermonecrotic toxin lisictox-alpha1 OS=Loxosceles intermedia OX=58218 PE=1 SV=1            | 2.7E-14 | 11.19 |
|                                                                               | Gene.43821_h_ijimai_15293_g.43821_m.43821 | BIB11_SICTE | Dermonecrotic toxin stsictox-beta1i OS=Sicarius terrosus OX=571544 PE=1 SV=1               | 2.4E-43 | 2.04  |
| Glycosyl hydrolase 37 family                                                  | Gene.84678_h_ijimai_62109_g.84678_m.84678 | TREA_PIMHY  | Trehalase OS=Pimpla hypochondriaca OX=135724 GN=tre1 PE=1 SV=1                             | 1.7E-26 | 1.74  |
| Nucleotide pyrophosphatase/phosphodiesterase family                           | Gene.42207_h_ijimai_14250_g.42207_m.42207 | PDE_NAJAT   | Venom phosphodiesterase OS=Naja atra OX=8656 PE=1 SV=1                                     | 1E-89   | 1.64  |
|                                                                               | Gene.19434_h_ijimai_3830_g.19434_m.19434  | PDE2_CROAD  | Venom phosphodiesterase 2 OS=Crotalus adamanteus OX=8729 PE=1 SV=1                         | 3.1E-21 | 2.91  |
| Phospholipase A2 family                                                       | Gene.59761_h_ijimai_289                   | PA2_URTCR   | Phospholipase A2 A2-actitoxin-Ucs2a OS=Urticina                                            | 5.7E-21 | 4.81  |

|                                                                                                   |                                                       |             |                                                                                                  |         |      |
|---------------------------------------------------------------------------------------------------|-------------------------------------------------------|-------------|--------------------------------------------------------------------------------------------------|---------|------|
|                                                                                                   | 83_g.59761_<br>m.59761                                |             | crassicornis<br>OX=45621 PE=1<br>SV=1                                                            |         |      |
| Phospholipase<br>A2 fam-<br>ily. Group I<br>subfamily. D49<br>sub-subfamily                       | Gene.67873_<br>h_ijimai_382<br>75_g.67873_<br>m.67873 | PA2B_BUNCE  | Basic phospho-<br>lipase A2 KPA2<br>OS=Bungarus caer-<br>uleus OX=132961<br>PE=1 SV=1            | 3.1E-14 | 0.81 |
|                                                                                                   | Gene.96797_<br>h_ijimai_818<br>89_g.96797_<br>m.96797 | PA2B1_ACAAN | Basic phospho-<br>lipase A2 acanthin-<br>1 OS=Acanthophis<br>antarcticus<br>OX=8605 PE=1<br>SV=1 | 2.1E-17 | 1.69 |
| Phospholipase<br>A2 fam-<br>ily. Group II<br>subfamily. D49<br>sub-subfamily                      | Gene.93238_<br>h_ijimai_758<br>56_g.93238_<br>m.93238 | PA2B_DABRR  | Basic phospho-<br>lipase A2 RVV-VD<br>OS=Daboia russelii<br>OX=8707 PE=1<br>SV=1                 | 1.3E-15 | 1.94 |
|                                                                                                   | Gene.40461_<br>h_ijimai_131<br>61_g.40461_<br>m.40461 | PA2BB_TRIST | Basic phospho-<br>lipase A2 Ts-G6D49<br>OS=Trimeresurus<br>stejnegeri<br>OX=39682 PE=1<br>SV=2   | 1.4E-19 | 6.17 |
| Phospholipase<br>A2 fam-<br>ily. Group III<br>subfamily                                           | Gene.61429_<br>h_ijimai_307<br>14_g.61429_<br>m.61429 | PA2A2_HELSU | Acidic phospho-<br>lipase A2 PA4<br>OS=Heloderma<br>suspectum<br>OX=8554 PE=1<br>SV=2            | 2.4E-30 | 4.40 |
|                                                                                                   | Gene.94293_<br>h_ijimai_776<br>73_g.94293_<br>m.94293 | HEMI1_HEMLE | Phospholipase A2<br>hemilipin<br>OS=Hemiscorpius<br>lepturus<br>OX=520031 PE=1<br>SV=1           | 3.8E-07 | 3.24 |
| Venom metallo-<br>proteinase<br>(M12B) fam-<br>ily. P-III sub-<br>family. P-iiia<br>sub-subfamily | Gene.78870_<br>h_ijimai_532<br>64_g.78870_<br>m.78870 | VM3_NAJAT   | Zinc metallopro-<br>teinase-disintegrin-<br>like namp OS=Naja<br>atra OX=8656 PE=2<br>SV=1       | 7.8E-10 | 1.29 |
| Venom metallo-<br>proteinase<br>(M12B) fam-<br>ily. P-II subfam-<br>ily. P-iib sub-<br>subfamily  | Gene.79950_<br>h_ijimai_548<br>68_g.79950_<br>m.79950 | VM2AG_GLOHA | Zinc metallopro-<br>teinase-disintegrin<br>agkistin<br>OS=Gloydus halys<br>OX=8714 PE=2<br>SV=1  | 5.6E-19 | 2.33 |
| Proteinase inhibitors                                                                             |                                                       |             |                                                                                                  |         |      |

|                                                                                |                                                   |                   |                                                                                       |                |             |
|--------------------------------------------------------------------------------|---------------------------------------------------|-------------------|---------------------------------------------------------------------------------------|----------------|-------------|
| <b>Serine protease inhibitor-like (TIL domain-containing) family</b>           | <b>Gene.55378_h_ijimai_245_27_g.55378_m.55378</b> | <b>ALL6_APICE</b> | <b>Venom serine protease inhibitor OS=Apis cerana OX=7461 PE=2 SV=1</b>               | <b>1.3E-06</b> | <b>1.03</b> |
| Venom Kunitz-type family                                                       | Gene.54210_h_ijimai_234_59_g.54210_m.54210        | VKT2_NAJNI        | Kunitz-type serine protease inhibitor 2 OS=Naja nivea OX=8655 PE=1 SV=1               | 1.5E-13        | 1.47        |
|                                                                                | Gene.39354_h_ijimai_124_94_g.39354_m.39354        | VKT2_BITGA        | Kunitz-type serine protease inhibitor bitisilin-2 OS=Bitis gabonica OX=8694 PE=1 SV=1 | 9.4E-15        | 2.65        |
|                                                                                | Gene.76307_h_ijimai_495_75_g.76307_m.76307        | VKT1_BITGA        | Kunitz-type serine protease inhibitor bitisilin-1 OS=Bitis gabonica OX=8694 PE=1 SV=1 | 1.5E-19        | 3.42        |
| Venom Kunitz-type family. Sea anemone type 2 potassium channel toxin subfamily | Gene.46349_h_ijimai_170_45_g.46349_m.46349        | ATPI1_ACTTE       | Actinia tenebrosa protease inhibitors OS=Actinia tenebrosa OX=6105 PE=1 SV=1          | 4.7E-36        | 52.76       |
| Ion channel inhibitor activity                                                 |                                                   |                   |                                                                                       |                |             |
| CRISP family                                                                   | Gene.24894_h_ijimai_565_2_g.24894_m.24894         | MR30_CONMR        | Cysteine-rich venom protein Mr30 OS=Conus marmoreus OX=42752 PE=1 SV=1                | 1.9E-34        | 3.10        |
|                                                                                | Gene.49571_h_ijimai_194_58_g.49571_m.49571        | CRVP1_PSEPL       | Cysteine-rich venom protein ENH1 OS=Pseudoferania polylepis OX=338839 PE=2 SV=1       | 9E-39          | 3.33        |
|                                                                                | Gene.54175_h_ijimai_234_30_g.54175_m.54175        | CRVP2_HYDHA       | Cysteine-rich venom protein 2 OS=Hydrophis hardwickii OX=8781 PE=2 SV=2               | 2.6E-19        | 2.60        |
|                                                                                | Gene.39233_h_ijimai_124_25_g.39233_m.39233        | CRVP_AUSSU        | Cysteine-rich venom protein OS=Austrelaps superbus OX=29156 PE=2 SV=1                 | 1E-18          | 15.81       |

|                                                            |                                                       |             |                                                                                                                            |         |       |
|------------------------------------------------------------|-------------------------------------------------------|-------------|----------------------------------------------------------------------------------------------------------------------------|---------|-------|
|                                                            | Gene.33916_<br>h_ijimai_946<br>5_g.33916_m.<br>33916  | CRVP_LATSE  | Cysteine-rich<br>venom protein<br>latisemin OS=Lati-<br>cauda semifasciata<br>OX=8631 PE=2<br>SV=1                         | 6.3E-19 | 3.17  |
|                                                            | Gene.48497_<br>h_ijimai_185<br>87_g.48497_<br>m.48497 | TX31_CONTE  | Cysteine-rich<br>venom protein<br>OS=Conus textile<br>OX=6494 PE=1<br>SV=1                                                 | 1.8E-23 | 2.45  |
| CRISP fam-<br>ily. Venom al-<br>lergen 5-like<br>subfamily | Gene.41400_<br>h_ijimai_137<br>75_g.41400_<br>m.41400 | VA576_SCODE | Scoloptoxin SSD976<br>OS=Scolopendra<br>dehaani<br>OX=2609776 PE=1<br>SV=1                                                 | 1.3E-26 | 22.85 |
|                                                            | Gene.78783_<br>h_ijimai_531<br>31_g.78783_<br>m.78783 | VA5_TITSE   | Venom allergen 5<br>(Fragments) OS=Ti-<br>tyus serrulatus<br>OX=6887 PE=1<br>SV=1                                          | 1.4E-07 | 0.77  |
| Hemostasis impairing toxin                                 |                                                       |             |                                                                                                                            |         |       |
| Snaclec family                                             | Gene.76159_<br>h_ijimai_493<br>80_g.76159_<br>m.76159 | SL124_ECHOC | Snaclec CTL-<br>Eoc124 OS=Echis<br>ocellatus OX=99586<br>PE=2 SV=1                                                         | 3.5E-06 | 0.56  |
|                                                            | Gene.93937_<br>h_ijimai_770<br>05_g.93937_<br>m.93937 | SLAD_MACLB  | Snaclec A13<br>OS=Macrovipera le-<br>betina OX=8709<br>PE=2 SV=1                                                           | 2E-08   | 1.73  |
|                                                            | Gene.87733_<br>h_ijimai_669<br>57_g.87733_<br>m.87733 | SLA_PROFL   | Snaclec coagulation<br>factor IX-binding<br>protein subunit A<br>OS=Protobothrops<br>flavoviridis<br>OX=88087 PE=1<br>SV=1 | 3.1E-09 | 0.82  |
|                                                            | Gene.54259_<br>h_ijimai_235<br>03_g.54259_<br>m.54259 | SLBB_TRIAB  | Snaclec alboaggre-<br>gin-B subunit beta<br>OS=Trimeresurus<br>albolabris OX=8765<br>PE=1 SV=2                             | 1.7E-11 | 0.60  |
|                                                            | Gene.15901_<br>h_ijimai_284<br>5_g.15901_m.<br>15901  | STXB_SYNVE  | Neoverrucotoxin<br>subunit beta<br>OS=Synanceia ver-<br>rucosa OX=51996<br>PE=1 SV=1                                       | 2.1E-96 | 3.48  |
| SNTX/VTX<br>toxin family                                   | Gene.62213_<br>h_ijimai_315<br>69_g.62213_<br>m.62213 | CTXA_SCOPL  | Cytolytic toxin-al-<br>pha OS=Scorpaena<br>plumieri                                                                        | 1.6E-31 | 2.57  |

|                                                   |                                           |             |                                                                                                       |         |       |
|---------------------------------------------------|-------------------------------------------|-------------|-------------------------------------------------------------------------------------------------------|---------|-------|
| OX=274700 PE=1<br>SV=1                            |                                           |             |                                                                                                       |         |       |
| True venom lectin family                          | Gene.88129_h_ijimai_67546_g.88129_m.88129 | LEC1_LEIMD  | C-type lectin lecto-toxin-Lei1 OS=Leioheterodon mada-gascariensis<br>OX=46577 PE=2<br>SV=1            | 2.6E-06 | 2.10  |
|                                                   | Gene.72600_h_ijimai_44478_g.72600_m.72600 | LECM1_HYDHA | C-type lectin 1 OS=Hydrophis hardwickii<br>OX=8781 PE=2<br>SV=1                                       | 1.8E-09 | 0.28  |
| Other toxins candidates                           |                                           |             |                                                                                                       |         |       |
| AVIT (prokineticin) family                        | Gene.57892_h_ijimai_27009_g.57892_m.57892 | BM8E_BOMMX  | Prokineticin Bm8-e OS=Bombina maxima OX=161274<br>PE=2 SV=1                                           | 2.9E-06 | 6.50  |
| EGF-like, Sushi, TSP type-1, LDL-receptor class A | Gene.62342_h_ijimai_31711_g.62342_m.62342 | CTX_SEPES   | SE-cephalotoxin OS=Sepia esculenta<br>OX=31210 PE=1<br>SV=1                                           | 1.8E-28 | 0.96  |
| IGFBP N-terminal, Kazal-like, Ig-like C2-type     | Gene.33729_h_ijimai_9376_g.33729_m.33729  | IGFBP_CUPSA | Insulin-like growth factor-binding protein-related protein 1 OS=Cupiennius salei OX=6928 PE=2<br>SV=1 | 2.1E-53 | 24.19 |

Table S7. Toxin transcripts of *Lineus longissimus*. Unique toxins families are shown in bold.

| Protein family                                                     | Transcript ID                                    | Uniprot accession  | Description                                                            | E-value        | Expression, TPM |
|--------------------------------------------------------------------|--------------------------------------------------|--------------------|------------------------------------------------------------------------|----------------|-----------------|
| Neurotoxins                                                        |                                                  |                    |                                                                        |                |                 |
| <b>Neurotoxin 02 (plectoxin) family. 02 (plectoxin) subfamily.</b> | <b>Gene.137391_1_long35194_g.137391_m.137391</b> | <b>TX22A_PLETR</b> | <b>Omega-plectoxin-Pt1a OS=Plectreuryts tristis OX=33319 PE=1 SV=1</b> | <b>2.5E-06</b> | <b>152.67</b>   |
| Pore-forming toxins                                                |                                                  |                    |                                                                        |                |                 |
| Cytotoxin A-III-like                                               | Gene.136669_1_long34583_g.136669_m.136669        | CXA3_CERLA         | Cytotoxin A-III OS=Cerebratulus lacteus OX=6221<br>PE=1 SV=1           | 2E-45          | 0.24            |
| MACPF domain                                                       | Gene.63359_1_long8572_g.63359_m.63359            | PV21_POMMA         | Perivitellin-2 67 kda subunit OS=Pomacea                               | 2.4E-89        | 6.78            |

|                                                               |                                                            |                  |                                                                                                   |                |             |
|---------------------------------------------------------------|------------------------------------------------------------|------------------|---------------------------------------------------------------------------------------------------|----------------|-------------|
| maculata<br>OX=1245466 PE=1<br>SV=1                           |                                                            |                  |                                                                                                   |                |             |
| Enzymes                                                       |                                                            |                  |                                                                                                   |                |             |
| Arthropod phospholipase D family. Class II subfamily          | Gene.130745<br>_l_long30563<br>_g.130745_m.130745          | A1L1_LOXSA       | Dermonecrotic toxin Isasictox-alphaib2i (Fragment)<br>OS=Loxosceles sabina OX=571529<br>PE=2 SV=1 | 4.7E-35        | 1.83        |
| Dnase II family                                               | Gene.110707<br>_l_long21360<br>_g.110707_m.110707          | DNA2_ACAPL       | Plancitoxin-1<br>OS=Acanthaster planci OX=133434<br>PE=1 SV=1                                     | 4.2E-94        | 8.26        |
| Flavin mono-amine oxidase family. FIG1 subfamily              | Gene.48707_1<br>_long5836_g.48707_m.48707                  | OXLA_CALRH       | L-amino-acid oxidase OS=Calloselasma rhodostoma OX=8717<br>PE=1 SV=2                              | 3E-44          | 1.90        |
| <b>Multicopper oxidase family</b>                             | <b>Gene.125889<br/>_l_long27832<br/>_g.125889_m.125889</b> | <b>FA5_PSETE</b> | <b>Coagulation factor V OS=Pseudonaja textilis OX=8673<br/>GN=F5 PE=1 SV=1</b>                    | <b>2.5E-24</b> | <b>0.59</b> |
| Natterin family                                               | Gene.131057<br>_l_long30751<br>_g.131057_m.131057          | NATT4_THANI      | Natterin-4<br>OS=Thalas-sophryne nattereri OX=289382 PE=2<br>SV=1                                 | 1.5E-07        | 0.80        |
| Phospholipase A2 family. Group I subfamily. D49 sub-subfamily | Gene.107060<br>_l_long20049<br>_g.107060_m.107060          | PA2B_MICCO       | Basic phospholipase A2 OS=Micrurus corallinus OX=54390 PE=1<br>SV=1                               | 1.2E-19        | 15.88       |
| Phospholipase A2 family. Group III subfamily                  | Gene.139946<br>_l_long37449<br>_g.139946_m.139946          | PA2A2_HELSU      | Acidic phospholipase A2 PA4<br>OS=Heloderma suspectum OX=8554 PE=1<br>SV=2                        | 4.2E-30        | 0.23        |
|                                                               | Gene.100331<br>_l_long17837<br>_g.100331_m.100331          | PA23_HELSU       | Phospholipase A2 isozymes<br>PA3A/PA3B/PA5<br>OS=Heloderma suspectum OX=8554 PE=1<br>SV=3         | 8.4E-33        | 17.55       |
| Venom metalloproteinase (M12B) family. P-III                  | Gene.17811_1<br>_long1502_g.17811_m.17811                  | VM3_BUNMU        | Zinc metalloproteinase-disintegrin-like bmbp<br>OS=Bungarus                                       | 1.3E-53        | 0.42        |



|                                                                                                |                                                       |                                      |                                                                                                                                              |         |       |
|------------------------------------------------------------------------------------------------|-------------------------------------------------------|--------------------------------------|----------------------------------------------------------------------------------------------------------------------------------------------|---------|-------|
| subfamily. P-iiiia<br>sub-subfamily                                                            |                                                       | multicinctus<br>OX=8616 PE=1<br>SV=1 |                                                                                                                                              |         |       |
| Proteinase inhibitors                                                                          |                                                       |                                      |                                                                                                                                              |         |       |
| Cystatin family                                                                                | Gene.144061<br>_l_long42022<br>_g.144061_m.<br>144061 | CYT_CHIGU                            | Cystatin-1<br>OS=Chilobrachys<br>guangxiensis<br>OX=278060 PE=2<br>SV=1                                                                      | 3.3E-09 | 19.40 |
| Kazal-like                                                                                     | Gene.141669<br>_l_long39209<br>_g.141669_m.<br>141669 | IELA_ANESU                           | PI-actitoxin-Avd5a<br>OS=Anemonia sul-<br>cata OX=6108 PE=1<br>SV=1                                                                          | 1.6E-09 | 0.97  |
| Natriuretic pep-<br>tide family                                                                | Gene.101475<br>_l_long18215<br>_g.101475_m.<br>101475 | SVM11_CERCE                          | Snake venom met-<br>alloprotease inhibi-<br>tor 02A10 OS=Ce-<br>rastes cerastes<br>OX=8697<br>GN=Svmpti-Cce12<br>PE=1 SV=1                   | 4.3E-09 | 0.29  |
| Venom Kunitz-<br>type family                                                                   | Gene.147661<br>_l_long47205<br>_g.147661_m.<br>147661 | VKT2_BITGA                           | Kunitz-type serine<br>protease inhibitor<br>bitisilin-2 OS=Bitis<br>gabonica OX=8694<br>PE=1 SV=1                                            | 1.6E-14 | 0.42  |
|                                                                                                | Gene.143563<br>_l_long41377<br>_g.143563_m.<br>143563 | VKT1D_CONCL                          | Kunitz-type serine<br>protease inhibitor<br>conotoxin Cal9.1d<br>(Fragment) OS=Cal-<br>iforniconus califor-<br>nicus OX=1736779<br>PE=2 SV=1 | 1.5E-17 | 21.65 |
|                                                                                                | Gene.138804<br>_l_long36403<br>_g.138804_m.<br>138804 | VKT1A_CONCL                          | Kunitz-type serine<br>protease inhibitor<br>conotoxin Cal9.1a<br>OS=Californiconus<br>californicus<br>OX=1736779 PE=2<br>SV=1                | 2.2E-17 | 13.22 |
| Venom Kunitz-<br>type family. Sea<br>anemone type 2<br>potassium<br>channel toxin<br>subfamily | Gene.87468_l<br>_long14140_<br>g.87468_m.87<br>468    | VKT2H_HETCR                          | PI-stichotoxin-<br>Hcr2h OS=Heter-<br>actis crispa<br>OX=175771 PE=3<br>SV=1                                                                 | 4.4E-16 | 1.79  |
| Venom Kunitz-<br>type fam-<br>ily. Scorpion<br>delta-Ktx sub-<br>family. Delta-                | Gene.127205<br>_l_long28520<br>_g.127205_m.<br>127205 | VKT12_MESMA                          | Kunitz-type serine<br>protease inhibitor<br>bmktt-3 OS=Meso-<br>buthus martensii<br>OX=34649 PE=2<br>SV=1                                    | 6.7E-15 | 0.78  |

|                                |                                                   |             |                                                                                               |         |       |
|--------------------------------|---------------------------------------------------|-------------|-----------------------------------------------------------------------------------------------|---------|-------|
| Ktx 1 sub-sub-family           | Gene.140308<br>_l_long37783<br>_g.140308_m.140308 | VKT11_HOFGE | Kunitz-type serine protease inhibitor Hg1 OS=Hoffman-nihadurus gertschi OX=380989 PE=1 SV=1   | 2.6E-15 | 0.42  |
| Ion channel inhibitor activity |                                                   |             |                                                                                               |         |       |
| CRISP family                   | Gene.157145<br>_l_long67833<br>_g.157145_m.157145 | CRVP_VIPBN  | Cysteine-rich venom protein (Fragment) OS=Vipera berus nikolskii OX=1808362 PE=2 SV=1         | 2.6E-13 | 0.32  |
|                                | Gene.130943<br>_l_long30684<br>_g.130943_m.130943 | CRVP_NOTSC  | Cysteine-rich venom protein pseudetoxin-like OS=Notechis scutatus scutatus OX=70142 PE=2 SV=1 | 8E-18   | 0.36  |
|                                | Gene.142151<br>_l_long39713<br>_g.142151_m.142151 | CRIS3_HUMAN | Cysteine-rich secretory protein 3 OS=Homo sapiens OX=9606 GN=CRISP3 PE=1 SV=1                 | 2.2E-30 | 54.62 |
|                                | Gene.122600<br>_l_long26276<br>_g.122600_m.122600 | CRVP_PSEPO  | Cysteine-rich venom protein pseudocin OS=Pseudechis porphyriacus OX=8671 PE=1 SV=1            | 7.5E-33 | 10.34 |
|                                | Gene.73577_1<br>_long10775_ g.73577_m.73577       | CRVP_AUSSU  | Cysteine-rich venom protein OS=Austrelaps superbus OX=29156 PE=2 SV=1                         | 2.8E-36 | 0.07  |
|                                | Gene.90326_1<br>_long14917_ g.90326_m.90326       | CRVP_PSEAU  | Cysteine-rich venom protein pseudetoxin OS=Pseudechis australis OX=8670 PE=1 SV=1             | 8.9E-38 | 1.61  |
|                                | Gene.121444<br>_l_long25753<br>_g.121444_m.121444 | MR30_CONMR  | Cysteine-rich venom protein Mr30 OS=Conus marmoreus OX=42752 PE=1 SV=1                        | 1.6E-37 | 0.15  |

|                                                            |                                                       |             |                                                                                                                                 |         |       |
|------------------------------------------------------------|-------------------------------------------------------|-------------|---------------------------------------------------------------------------------------------------------------------------------|---------|-------|
|                                                            | Gene.125968<br>_l_long27877<br>_g.125968_m.<br>125968 | CRVP_LATSE  | Cysteine-rich<br>venom protein<br>latisemin OS=Lati-<br>cauda semifasciata<br>OX=8631 PE=2<br>SV=1                              | 1.7E-15 | 6.31  |
| CRISP fam-<br>ily. Venom al-<br>lergen 5-like<br>subfamily | Gene.123301<br>_l_long26609<br>_g.123301_m.<br>123301 | VA543_SCODE | Scoloptoxin SSD43<br>OS=Scolopendra<br>dehaani<br>OX=2609776 PE=1<br>SV=1                                                       | 6E-27   | 0.91  |
| Scoloptoxin-11<br>family                                   | Gene.119454<br>_l_long24839<br>_g.119454_m.<br>119454 | TXB3A_SCODE | U-scoloptoxin(11)-<br>Ssd3a OS=Scolo-<br>pendra dehaani<br>OX=2609776 PE=1<br>SV=1                                              | 2E-07   | 21.20 |
| Hemostasis impairing toxin                                 |                                                       |             |                                                                                                                                 |         |       |
| Snaclec family                                             | Gene.141292<br>_l_long38803<br>_g.141292_m.<br>141292 | SLCB_DEIAC  | Snaclec agkicetin-C<br>subunit beta<br>OS=Deinagkistro-<br>don acutus<br>OX=36307 PE=1<br>SV=1                                  | 4.2E-08 | 15.18 |
|                                                            | Gene.102923<br>_l_long18662<br>_g.102923_m.<br>102923 | SLDB_TRIAB  | Snaclec alboaggre-<br>gin-D subunit beta<br>OS=Trimeresurus<br>albolabris OX=8765<br>PE=1 SV=1                                  | 3.6E-10 | 1.58  |
|                                                            | Gene.112660<br>_l_long22103<br>_g.112660_m.<br>112660 | SLLC1_MACLB | Snaclec coagulation<br>factor X-activating<br>enzyme light chain<br>1 OS=Macrovipera<br>lebetina OX=8709<br>GN=LC1 PE=1<br>SV=1 | 1.9E-12 | 0.88  |
|                                                            | Gene.9577_l_<br>long658_g.95<br>77_m.9577             | SL3_SISCA   | Snaclec 3 OS=Sis-<br>trurus catenatus<br>edwardsii OX=8762<br>PE=2 SV=1                                                         | 2.4E-13 | 0.50  |
|                                                            | Gene.67592_l_<br>long9457_g.<br>67592_m.675<br>92     | SLA_BITAR   | Snaclec bitiscetin<br>subunit alpha<br>OS=Bitis arietans<br>OX=8692 PE=1<br>SV=1                                                | 3.3E-14 | 0.54  |
| True venom<br>lectin family                                | Gene.146352<br>_l_long45155<br>_g.146352_m.<br>146352 | LECG1_BUNMU | C-type lectin BML-<br>1 OS=Bungarus<br>multicinctus<br>OX=8616 PE=2<br>SV=1                                                     | 5.1E-09 | 0.28  |
|                                                            | Gene.102764<br>_l_long18613                           | LEC1_MICCO  | C-type lectin<br>OS=Micrurus                                                                                                    | 7.8E-08 | 0.72  |

|                                                       |                                                       |             |                                                                                                                     |         |       |
|-------------------------------------------------------|-------------------------------------------------------|-------------|---------------------------------------------------------------------------------------------------------------------|---------|-------|
|                                                       | _g.102764_m.<br>102764                                |             | corallinus<br>OX=54390 PE=1<br>SV=1                                                                                 |         |       |
|                                                       | Gene.99209_1<br>_long17495_<br>g.99209_m.99<br>209    | LECM1_PHIOL | C-type lectin lec-<br>toxin-Phi1 OS=Phil-<br>odryas olfersii<br>OX=120305 PE=2<br>SV=1                              | 5E-10   | 0.18  |
| Other toxins candidates                               |                                                       |             |                                                                                                                     |         |       |
| Conocap - like                                        | Gene.38449_1<br>_long4188_g.<br>38449_m.384<br>49     | CCAP_CONVL  | Conocap OS=Co-<br>nus viliepinii<br>OX=257347<br>GN=conocap PE=1<br>SV=1                                            | 8.7E-07 | 5.49  |
| EGF domain<br>peptide family                          | Gene.123598<br>_1_long26751<br>_g.123598_m.<br>123598 | TX18A_MANRB | U18-myrmecitoxin-<br>Mri1a OS=Manica<br>rubida OX=219785<br>PE=1 SV=1                                               | 7.7E-07 | 1.34  |
| Glycoprotein<br>hormones sub-<br>unit alpha family    | Gene.117298<br>_1_long23931<br>_g.117298_m.<br>117298 | CTHA2_CONVC | Thyrostimulin al-<br>pha-2 subunit<br>OS=Conus victoriae<br>OX=319920 PE=1<br>SV=1                                  | 7.4E-19 | 7.02  |
| Glycoprotein<br>hormones sub-<br>unit beta family     | Gene.120462<br>_1_long25319<br>_g.120462_m.<br>120462 | CTHB5_CONVC | Thyrostimulin beta-<br>5 subunit OS=Co-<br>nus victoriae<br>OX=319920 PE=2<br>SV=1                                  | 9.9E-19 | 11.19 |
| IGFBP N-termi-<br>nal domain                          | Gene.151742<br>_1_long54638<br>_g.151742_m.<br>151742 | VP302_LYCMC | Venom protein 302<br>OS=Lychas mucro-<br>natus OX=172552<br>PE=2 SV=1                                               | 1.8E-08 | 0.40  |
| IGFBP N-termi-<br>nal, Kazal-like,<br>Ig-like C2-type | Gene.129083<br>_1_long29578<br>_g.129083_m.<br>129083 | IGFBP_CUPSA | Insulin-like growth<br>factor-binding pro-<br>tein-related protein<br>1 OS=Cupiennius<br>salei OX=6928 PE=2<br>SV=1 | 6.2E-52 | 9.67  |
| Insulin family                                        | Gene.100267<br>_1_long17817<br>_g.100267_m.<br>100267 | INS2C_CONFO | Con-Ins F2c<br>OS=Conus floridu-<br>lus OX=97180 PE=1<br>SV=1                                                       | 9.3E-09 | 2.85  |
|                                                       | Gene.109882<br>_1_long21067<br>_g.109882_m.<br>109882 | INS1_CONIM  | Con-Ins Im1<br>OS=Conus imperi-<br>alis OX=35631 PE=2<br>SV=1                                                       | 2.6E-14 | 1.25  |
| LDL-receptor<br>class A domain                        | Gene.99182_1<br>_long17485_<br>g.99182_m.99<br>182    | CPROH_CONVC | Neuropeptide pro-<br>hormone-4 OS=Co-<br>nus victoriae<br>OX=319920 PE=1<br>SV=1                                    | 8.6E-24 | 11.07 |

|                 |                                        |             |                                                                       |         |      |
|-----------------|----------------------------------------|-------------|-----------------------------------------------------------------------|---------|------|
| NGF-beta family | Gene.71709_1_long10348_g.71709_m.71709 | NGFV1_PSEAU | Venom nerve growth factor 1 OS=Pseudechis australis OX=8670 PE=2 SV=1 | 1.8E-12 | 0.43 |
|-----------------|----------------------------------------|-------------|-----------------------------------------------------------------------|---------|------|

Table S8. Toxin transcripts of *Lineus ruber*.

| Protein family                                                                | Transcript ID                            | Uniprot accession | Description                                                                                     | E-value | Expression, TPM |
|-------------------------------------------------------------------------------|------------------------------------------|-------------------|-------------------------------------------------------------------------------------------------|---------|-----------------|
| Pore-forming toxins                                                           |                                          |                   |                                                                                                 |         |                 |
| Actinoporin family. Conoidea subfamily                                        | Gene.59713_L_ruber_19170_g.59713_m.59713 | ACTP1_TERAN       | Tereporin-Ca1 (Fragment) OS=Ter-ebra anilis OX=553697 PE=2 SV=1                                 | 2.1E-28 | 45.91           |
| Cytotoxin A-III-like                                                          | Gene.88551_L_ruber_53287_g.88551_m.88551 | CXA3_CERLA        | Cytotoxin A-III OS=Cerebratulus lacteus OX=6221 PE=1 SV=1                                       | 7.9E-42 | 63.10           |
| MACPF domain                                                                  | Gene.29509_L_ruber_5163_g.29509_m.29509  | PV21_POMMA        | Perivitellin-2 67 kda subunit OS=Pomacea maculata OX=1245466 PE=1 SV=1                          | 3.9E-92 | 3.01            |
| Enzymes                                                                       |                                          |                   |                                                                                                 |         |                 |
| Arthropod phospholipase D family. Class II subfamily                          | Gene.50684_L_ruber_13690_g.50684_m.50684 | A1LB1_LOXAR       | Dermonecrotic toxin larsictox-alphaib2bi (Fragment) OS=Loxosceles arizonica OX=196454 PE=1 SV=1 | 1.6E-29 | 7.57            |
| Arthropod phospholipase D family. Class II subfamily. Class iia sub-subfamily | Gene.40924_L_ruber_9156_g.40924_m.40924  | A4A1_LOXIN        | Dermonecrotic toxin lisictox-alphaiva1 OS=Loxosceles intermedia OX=58218 PE=1 SV=1              | 1.7E-39 | 17.86           |
| Arthropod phospholipase D family. Class II subfamily. Class iib sub-subfamily | Gene.95693_L_ruber_66547_g.95693_m.95693 | B1Q_LOXIN         | Dermonecrotic toxin lisictox-betaid1 OS=Loxosceles intermedia OX=58218 PE=1 SV=1                | 3.1E-13 | 0.50            |
|                                                                               | Gene.89353_L_ruber_547                   | B1H_LOXLA         | Dermonecrotic toxin llsictox-                                                                   | 7E-22   | 0.51            |

|                                                                                   |                                          |             |                                                                                               |         |       |
|-----------------------------------------------------------------------------------|------------------------------------------|-------------|-----------------------------------------------------------------------------------------------|---------|-------|
|                                                                                   | 04_g.89353_m.89353                       |             | betaia1 OS=Loxosceles laeta<br>OX=58217 PE=1<br>SV=1                                          |         |       |
|                                                                                   | Gene.41631_L_ruber_9450_g.41631_m.41631  | B1HA_LOXBO  | Dermonecrotic toxin lbsictox-betaia1a OS=Loxosceles boneti<br>OX=283164 PE=1<br>SV=2          | 2.1E-41 | 6.18  |
| Dnase II family                                                                   | Gene.48438_L_ruber_12571_g.48438_m.48438 | DNA2_ACAPL  | Plancitoxin-1 OS=Acanthaster planci OX=133434<br>PE=1 SV=1                                    | 1.9E-91 | 0.98  |
| Flavin monoamine oxidase family. FIG1 subfamily                                   | Gene.23011_L_ruber_3399_g.23011_m.23011  | OXLA_BOTAT  | L-amino-acid oxidase OS=Bothrops atrox OX=8725<br>PE=1 SV=2                                   | 5.9E-48 | 1.84  |
| Phospholipase A2 family. Group I subfamily. D49 sub-subfamily                     | Gene.45934_L_ruber_11378_g.45934_m.45934 | PA2B_MICCO  | Basic phospholipase A2 OS=Micrurus corallinus<br>OX=54390 PE=1<br>SV=1                        | 5E-20   | 4.17  |
| Phospholipase A2 family. Group III subfamily                                      | Gene.53961_L_ruber_15534_g.53961_m.53961 | PA23_HELSU  | Phospholipase A2 isozymes PA3A/PA3B/PA5 OS=Heloderma suspectum<br>OX=8554 PE=1<br>SV=3        | 6.8E-30 | 7.76  |
|                                                                                   | Gene.36510_L_ruber_7471_g.36510_m.36510  | PA2A2_HELSU | Acidic phospholipase A2 PA4 OS=Heloderma suspectum<br>OX=8554 PE=1<br>SV=2                    | 1.5E-32 | 2.39  |
| Proteinase inhibitors                                                             |                                          |             |                                                                                               |         |       |
| Venom Kunitz-type family. Scorpion delta-Ktx subfamily. Delta-Ktx 3 sub-subfamily | Gene.54609_L_ruber_15904_g.54609_m.54609 | VKT31_MESMA | Kunitz-type serine protease inhibitor bmkt-2 OS=Mesobuthus martensii<br>OX=34649 PE=2<br>SV=2 | 2.2E-15 | 35.16 |
| Ion channel inhibitor activity                                                    |                                          |             |                                                                                               |         |       |
| CRISP family                                                                      | Gene.48539_L_ruber_12613_g.48539_m.48539 | CRVP_LATSE  | Cysteine-rich venom protein latisemin OS=Laticauda semifasciata<br>OX=8631 PE=2<br>SV=1       | 4.9E-23 | 2.40  |

|                                                                                                |                                                      |             |                                                                                                                   |         |        |
|------------------------------------------------------------------------------------------------|------------------------------------------------------|-------------|-------------------------------------------------------------------------------------------------------------------|---------|--------|
|                                                                                                | Gene.70348_<br>L_ruber_282<br>88_g.70348_<br>m.70348 | GPRL1_BOVIN | GLIPR1-like pro-<br>tein 1 OS=Bos tau-<br>rus OX=9913<br>GN=GLIPR1L1<br>PE=1 SV=1                                 | 2.4E-25 | 6.97   |
|                                                                                                | Gene.48775_<br>L_ruber_127<br>26_g.48775_<br>m.48775 | CRVP_AUSSU  | Cysteine-rich<br>venom protein<br>OS=Austrelaps su-<br>perbus OX=29156<br>PE=2 SV=1                               | 1.2E-28 | 2.48   |
|                                                                                                | Gene.45105_<br>L_ruber_109<br>68_g.45105_<br>m.45105 | CRVP_ERYPO  | Cysteine-rich<br>venom protein<br>LIO1 (Fragment)<br>OS=Erythrolampru<br>s poecilogyrus<br>OX=338838 PE=2<br>SV=1 | 2.5E-30 | 1.61   |
|                                                                                                | Gene.47888_<br>L_ruber_123<br>10_g.47888_<br>m.47888 | CRVP_PHIOL  | Cysteine-rich<br>venom protein<br>OS=Philodryas olf-<br>ersii OX=120305<br>PE=2 SV=1                              | 2.7E-31 | 2.66   |
|                                                                                                | Gene.50154_<br>L_ruber_134<br>16_g.50154_<br>m.50154 | MR30_CONMR  | Cysteine-rich<br>venom protein<br>Mr30 OS=Conus<br>marmoreus<br>OX=42752 PE=1<br>SV=1                             | 6.9E-38 | 2.03   |
|                                                                                                | Gene.57217_<br>L_ruber_175<br>56_g.57217_<br>m.57217 | CRVP_PSEAU  | Cysteine-rich<br>venom protein<br>pseudechetoxin<br>OS=Pseudechis<br>australis OX=8670<br>PE=1 SV=1               | 4.8E-40 | 0.44   |
| CRISP fam-<br>ily. Venom al-<br>lergen 5-like<br>subfamily                                     | Gene.42835_<br>L_ruber_994<br>7_g.42835_m.<br>42835  | VA576_SCODE | Scoloptoxin SSD976<br>OS=Scolopendra<br>dehaani<br>OX=2609776 PE=1<br>SV=1                                        | 1.1E-32 | 1.62   |
| Nemertide fam-<br>ily                                                                          | Gene.99712_<br>L_ruber_746<br>18_g.99712_<br>m.99712 | NEMA1_LINLO | Nemertide alpha-1<br>(Fragment)<br>OS=Lineus longissi-<br>mus OX=88925<br>PE=1 SV=1                               | 1.4E-35 | 20.54  |
| Venom Kunitz-<br>type family. Sea<br>anemone type 2<br>potassium<br>channel toxin<br>subfamily | Gene.87032_<br>L_ruber_505<br>99_g.87032_<br>m.87032 | VKT5_ANEVI  | U-actitoxin-Avd3h<br>OS=Anemonia vi-<br>ridis OX=51769<br>PE=3 SV=1                                               | 4.1E-16 | 140.87 |
| Hemostasis impairing toxin                                                                     |                                                      |             |                                                                                                                   |         |        |

|                                                       |                                                      |             |                                                                                                                     |         |      |
|-------------------------------------------------------|------------------------------------------------------|-------------|---------------------------------------------------------------------------------------------------------------------|---------|------|
| Snaclec family                                        | Gene.52300_<br>L_ruber_145<br>63_g.52300_<br>m.52300 | SL3_SISCA   | Snaclec 3 OS=Sis-<br>trurus catenatus<br>edwardsii OX=8762<br>PE=2 SV=1                                             | 3.6E-13 | 1.74 |
|                                                       | Gene.50378_<br>L_ruber_135<br>34_g.50378_<br>m.50378 | SLA_BITAR   | Snaclec bitiscetin<br>subunit alpha<br>OS=Bitis arietans<br>OX=8692 PE=1<br>SV=1                                    | 4.7E-15 | 0.00 |
| SNTX/VTX<br>toxin family                              | Gene.19632_<br>L_ruber_263<br>3_g.19632_m.<br>19632  | STXB_SYNVE  | Neoverrucotoxin<br>subunit beta<br>OS=Synanceia ver-<br>rucosa OX=51996<br>PE=1 SV=1                                | 2.5E-99 | 0.88 |
| True venom<br>lectin family                           | Gene.82960_<br>L_ruber_440<br>78_g.82960_<br>m.82960 | LECM1_PHIOL | C-type lectin lec-<br>toxin-Phi1 OS=Phil-<br>odryas olfersii<br>OX=120305 PE=2<br>SV=1                              | 1.9E-15 | 0.53 |
| Other toxins candidates                               |                                                      |             |                                                                                                                     |         |      |
| Glycoprotein<br>hormones subu-<br>nit alpha family    | Gene.62977_<br>L_ruber_216<br>77_g.62977_<br>m.62977 | CTHA2_CONVC | Thyrostimulin al-<br>pha-2 subunit<br>OS=Conus victoriae<br>OX=319920 PE=1<br>SV=1                                  | 6.6E-20 | 0.24 |
| Glycoprotein<br>hormones subu-<br>nit beta family     | Gene.64507_<br>L_ruber_229<br>03_g.64507_<br>m.64507 | CTHB5_CONVC | Thyrostimulin beta-<br>5 subunit OS=Co-<br>nus victoriae<br>OX=319920 PE=2<br>SV=1                                  | 2.1E-18 | 0.60 |
| IGFBP N-termi-<br>nal, Kazal-like,<br>Ig-like C2-type | Gene.22728_<br>L_ruber_333<br>0_g.22728_m.<br>22728  | IGFBP_CUPSA | Insulin-like growth<br>factor-binding pro-<br>tein-related protein<br>1 OS=Cupiennius<br>salei OX=6928 PE=2<br>SV=1 | 1.3E-51 | 3.45 |
| LDL-receptor<br>class A domain                        | Gene.29081_<br>L_ruber_503<br>5_g.29081_m.<br>29081  | CPROH_CONVC | Neuropeptide pro-<br>hormone-4 OS=Co-<br>nus victoriae<br>OX=319920 PE=1<br>SV=1                                    | 1.7E-24 | 8.09 |
| Venom comple-<br>ment C3 homo-<br>log family          | Gene.80447_<br>L_ruber_404<br>51_g.80447_<br>m.80447 | VCO3_OPHHA  | Ophiophagus<br>venom factor<br>OS=Ophiophagus<br>hannah OX=8665<br>PE=1 SV=1                                        | 3E-19   | 1.52 |

**Table S9.** Toxin transcripts of *Lineus sanguineus*. Unique toxins families are shown in bold.



| Protein family                                        | Transcript ID                                              | Uniprot accession | Description                                                                                              | E-value | Expression, TPM |
|-------------------------------------------------------|------------------------------------------------------------|-------------------|----------------------------------------------------------------------------------------------------------|---------|-----------------|
| Neurotoxins                                           |                                                            |                   |                                                                                                          |         |                 |
| Conopeptide P-like superfamily                        | Gene.81947_<br>L_san-guineus_509<br>72_g.81947_<br>m.81947 | TU91_LOPOL        | Turriptide Lol9.1<br>OS=Lophiotoma olangoensis<br>OX=2420066 PE=2<br>SV=1                                | 2.5E-07 | 1.52            |
|                                                       | Gene.86098_<br>L_san-guineus_566<br>33_g.86098_<br>m.86098 | TU11_LOPAL        | Turriptide OL11-like (Fragment)<br>OS=Lophiotoma albina<br>OX=1525239 PE=2<br>SV=1                       | 3.1E-08 | 1.41            |
| Neurotoxin 04 (omega-agtx) family. 02 (Tx1) subfamily | Gene.68419_<br>L_san-guineus_353<br>94_g.68419_<br>m.68419 | TXL1_PHONI        | Mu-ctenitoxin-Pn1a OS=Phoneutria nigriventer<br>OX=6918 PE=1<br>SV=2                                     | 4.6E-06 | 185.65          |
| Neurotoxin 10 (Hwtx-1) family. 15 (Hntx-3) subfamily  | Gene.74066_<br>L_san-guineus_415<br>16_g.74066_<br>m.74066 | H3A08_CYRHA       | Hainantoxin-III 8<br>OS=Cyriopagopus hainanus<br>OX=209901 PE=1<br>SV=1                                  | 1.2E-07 | 564.98          |
| Pore-forming toxins                                   |                                                            |                   |                                                                                                          |         |                 |
| Cytotoxin A-III-like                                  | Gene.52528_<br>L_san-guineus_217<br>31_g.52528_<br>m.52528 | CXA3_CERLA        | Cytotoxin A-III<br>OS=Cerebratulus lacteus<br>OX=6221 PE=1<br>SV=1                                       | 2.9E-47 | 427.35          |
| MACPF domain                                          | Gene.82474_<br>L_san-guineus_516<br>62_g.82474_<br>m.82474 | PV21_POMCA        | Perivitellin-2 67 kda subunit<br>OS=Pomacea canaliculata<br>OX=400727 PE=1<br>SV=2                       | 2.6E-15 | 1.38            |
|                                                       | Gene.61455_<br>L_san-guineus_288<br>89_g.61455_<br>m.61455 | PV21_POMMA        | Perivitellin-2 67 kda subunit<br>OS=Pomacea maculata<br>OX=1245466 PE=1<br>SV=1                          | 1.1E-24 | 2.77            |
| Enzymes                                               |                                                            |                   |                                                                                                          |         |                 |
| Arthropod phospholipase D family. Class II subfamily  | Gene.94336_<br>L_san-guineus_693<br>30_g.94336_<br>m.94336 | A1LB1_LOXAR       | Dermonecrotic toxin larsictox-alphaib2bi (Fragment)<br>OS=Loxosceles arizonica<br>OX=196454 PE=1<br>SV=1 | 8.9E-07 | 1.44            |
|                                                       | Gene.55261_<br>L_san-guineus_237                           | A1OC_LOXRU        | Dermonecrotic toxin lrusictox-alphaic1c (Fragment)                                                       | 1.9E-18 | 2.30            |

|                                                                                                |                                                                |             |                                                                                                                  |         |       |
|------------------------------------------------------------------------------------------------|----------------------------------------------------------------|-------------|------------------------------------------------------------------------------------------------------------------|---------|-------|
|                                                                                                | 98_g.55261_<br>m.55261                                         |             | OS=Loxosceles ru-<br>fescens OX=571528<br>PE=2 SV=1                                                              |         |       |
|                                                                                                | Gene.40396_<br>L_san-<br>guineus_140<br>37_g.40396_<br>m.40396 | A11B1_LOXIN | Dermonecrotic<br>toxin lisictox-al-<br>phaia2bi OS=Lox-<br>osceles intermedia<br>OX=58218 PE=2<br>SV=1           | 2.4E-38 | 6.73  |
|                                                                                                | Gene.37457_<br>L_san-<br>guineus_124<br>69_g.37457_<br>m.37457 | A21_LOXAR   | Dermonecrotic<br>toxin larsictox-al-<br>phaii1 (Fragment)<br>OS=Loxosceles ari-<br>zonica OX=196454<br>PE=2 SV=1 | 1.8E-47 | 4.00  |
| Arthropod<br>phospholipase<br>D family. Class<br>II subfam-<br>ily. Class iia<br>sub-subfamily | Gene.29321_<br>L_san-<br>guineus_861<br>9_g.29321_m.<br>29321  | A51_LOXIN   | Dermonecrotic<br>toxin lisictox-al-<br>phav1 OS=Loxosce-<br>les intermedia<br>OX=58218 PE=1<br>SV=1              | 4.3E-46 | 10.15 |
| Dnase II family                                                                                | Gene.59918_<br>L_san-<br>guineus_275<br>83_g.59918_<br>m.59918 | DNA2_ACAPL  | Plancitoxin-1<br>OS=Acanthaster<br>planci OX=133434<br>PE=1 SV=1                                                 | 6.6E-56 | 3.10  |
| Flavin mono-<br>amine oxidase<br>family. FIG1<br>subfamily                                     | Gene.16674_<br>L_san-<br>guineus_384<br>2_g.16674_m.<br>16674  | OXLA_BOTPC  | L-amino acid oxi-<br>dase (Fragment)<br>OS=Bothrops pictus<br>OX=133440 PE=1<br>SV=1                             | 1.2E-38 | 9.77  |
| Natterin family                                                                                | Gene.29078_<br>L_san-<br>guineus_851<br>8_g.29078_m.<br>29078  | NATT4_THANI | Natterin-4<br>OS=Thalas-<br>sophryne nattereri<br>OX=289382 PE=2<br>SV=1                                         | 1.1E-11 | 3.44  |
| Nucleotide py-<br>rophospha-<br>tase/phos-<br>phodiesterase<br>family                          | Gene.16311_<br>L_san-<br>guineus_372<br>7_g.16311_m.<br>16311  | PDE2_CROAD  | Venom phos-<br>phodiesterase 2<br>OS=Crotalus ada-<br>manteus OX=8729<br>PE=1 SV=1                               | 4E-176  | 3.81  |
| Peptidase<br>M12A domain                                                                       | Gene.56334_<br>L_san-<br>guineus_246<br>34_g.56334_<br>m.56334 | VMPA4_LOXLA | Astacin-like metal-<br>loprotease toxin 4<br>(Fragment)<br>OS=Loxosceles<br>laeta OX=58217<br>PE=2 SV=1          | 5.9E-08 | 1.46  |

|                                                               |                                                   |             |                                                                                             |          |       |
|---------------------------------------------------------------|---------------------------------------------------|-------------|---------------------------------------------------------------------------------------------|----------|-------|
| Phospholipase A2 family                                       | Gene.14943_L_san-guineus_3301_g.14943_m.14943     | PA21_SCODE  | Phospholipase A2 SSD387 OS=Scolopendra dehaani OX=2609776 PE=1 SV=1                         | 6.9E-21  | 11.86 |
| Phospholipase A2 family. Group I subfamily. D49 sub-subfamily | Gene.107532_L_san-guineus_92735_g.107532_m.107532 | PA2B_MICCO  | Basic phospholipase A2 OS=Micrurus corallinus OX=54390 PE=1 SV=1                            | 2.6E-06  | 1.07  |
|                                                               | Gene.15767_L_san-guineus_3556_g.15767_m.15767     | PA2BA_BUNFA | Basic phospholipase A2 10 (Fragment) OS=Bungarus fasciatus OX=8613 PE=1 SV=2                | 1.6E-20  | 6.43  |
| Phospholipase A2 family. Group III subfamily                  | Gene.39305_L_san-guineus_13431_g.39305_m.39305    | HEMI1_HEMLE | Phospholipase A2 hemilipin OS=Hemiscorpius lepturus OX=520031 PE=1 SV=1                     | 1.7E-17  | 29.62 |
|                                                               | Gene.35790_L_san-guineus_11591_g.35790_m.35790    | PA23_HELSU  | Phospholipase A2 isozymes PA3A/PA3B/PA5 OS=Heloderma suspectum OX=8554 PE=1 SV=3            | 7E-29    | 5.67  |
|                                                               | Gene.27806_L_san-guineus_7962_g.27806_m.27806     | PA2A2_HELSU | Acidic phospholipase A2 PA4 OS=Heloderma suspectum OX=8554 PE=1 SV=2                        | 1.2E-33  | 6.81  |
| Type-B carboxylesterase/lipase family                         | Gene.23027_L_san-guineus_6063_g.23027_m.23027     | ACES_BUNFA  | Acetylcholinesterase OS=Bungarus fasciatus OX=8613 GN=ACHE PE=1 SV=2                        | 1.3E-125 | 2.54  |
| Venom metalloproteinase (M12B) family. P-I subfamily          | Gene.78387_L_san-guineus_46574_g.78387_m.78387    | VM1B2_BOTJR | Snake venom metalloproteinase bjsump-2 (Fragment) OS=Bothrops jararacussu OX=8726 PE=1 SV=1 | 7.3E-08  | 0.61  |
| Venom metalloproteinase (M12B) family. P-II                   | Gene.86069_L_san-guineus_56583_g.86069_m.86069    | VM2AB_AGKCO | Zinc metalloproteinase/disintegrin OS=Agkistrodon contortrix                                | 8.4E-06  | 2.62  |

| subfamily. P-<br>ie sub-subfam-<br>ily |                                                                | contortrix OX=8713<br>PE=1 SV=1 |                                                                                                                               |         |         |
|----------------------------------------|----------------------------------------------------------------|---------------------------------|-------------------------------------------------------------------------------------------------------------------------------|---------|---------|
| Proteinase inhibitors                  |                                                                |                                 |                                                                                                                               |         |         |
| Venom Kunitz-<br>type family           | Gene.82424_<br>L_san-<br>guineus_515<br>97_g.82424_<br>m.82424 | VKT_BOMIG                       | Kunitz-type serine<br>protease inhibitor<br>Bi-KTI OS=Bombus<br>ignitus OX=130704<br>PE=2 SV=1                                | 2.8E-11 | 4.18    |
|                                        | Gene.85469_<br>L_san-<br>guineus_556<br>87_g.85469_<br>m.85469 | VKT_AUSLA                       | Putative Kunitz-<br>type serine prote-<br>ase inhibitor<br>OS=Austrelaps la-<br>bialis OX=471292<br>PE=2 SV=1                 | 1.6E-12 | 1.32    |
|                                        | Gene.66438_<br>L_san-<br>guineus_334<br>58_g.66438_<br>m.66438 | VKT1A_CONCL                     | Kunitz-type serine<br>protease inhibitor<br>conotoxin Cal9.1a<br>OS=Californiconus<br>californicus<br>OX=1736779 PE=2<br>SV=1 | 1.4E-16 | 1037.70 |
|                                        | Gene.66701_<br>L_san-<br>guineus_337<br>10_g.66701_<br>m.66701 | VKT3_BITGA                      | Kunitz-type serine<br>protease inhibitor<br>bitisilin-3 (Frag-<br>ment) OS=Bitis ga-<br>bonica OX=8694<br>PE=2 SV=1           | 1.2E-40 | 3.14    |
| Ion channel inhibitor activity         |                                                                |                                 |                                                                                                                               |         |         |
| CRISP family                           | Gene.50968_<br>L_san-<br>guineus_206<br>37_g.50968_<br>m.50968 | CRVP_ERYPO                      | Cysteine-rich<br>venom protein<br>LIO1 (Fragment)<br>OS=Erythrolampru<br>s poecilogyrus<br>OX=338838 PE=2<br>SV=1             | 1.5E-18 | 1.67    |
|                                        | Gene.35657_<br>L_san-<br>guineus_115<br>30_g.35657_<br>m.35657 | CRVP_LATSE                      | Cysteine-rich<br>venom protein<br>latisemin OS=Lati-<br>cauda semifasciata<br>OX=8631 PE=2<br>SV=1                            | 1.9E-23 | 2.98    |
|                                        | Gene.19374_<br>L_san-<br>guineus_475<br>0_g.19374_m.<br>19374  | CRVP_PHIOL                      | Cysteine-rich<br>venom protein<br>OS=Philodryas olf-<br>ersii OX=120305<br>PE=2 SV=1                                          | 1.3E-31 | 4.39    |
|                                        | Gene.45189_<br>L_san-<br>guineus_168                           | MR30_CONMR                      | Cysteine-rich<br>venom protein<br>Mr30 OS=Conus                                                                               | 1.9E-40 | 20.41   |

|                                                            |                                                                |             |                                                                                                          |         |        |
|------------------------------------------------------------|----------------------------------------------------------------|-------------|----------------------------------------------------------------------------------------------------------|---------|--------|
|                                                            | 26_g.45189_<br>m.45189                                         |             | marmoreus<br>OX=42752 PE=1<br>SV=1                                                                       |         |        |
| CRISP fam-<br>ily. Venom al-<br>lergen 5-like<br>subfamily | Gene.79573_<br>L_san-<br>guineus_479<br>61_g.79573_<br>m.79573 | VA543_SCODE | Scoloptoxin SSD43<br>OS=Scolopendra<br>dehaani<br>OX=2609776 PE=1<br>SV=1                                | 3.3E-10 | 1.21   |
|                                                            | Gene.88376_<br>L_san-<br>guineus_599<br>69_g.88376_<br>m.88376 | VA5_VESMA   | Venom allergen 5<br>OS=Vespa manda-<br>rinia OX=7446 PE=1<br>SV=1                                        | 8.1E-17 | 0.69   |
|                                                            | Gene.68416_<br>L_san-<br>guineus_353<br>92_g.68416_<br>m.68416 | VA5_POLDO   | Venom allergen 5<br>OS=Polistes domi-<br>nula OX=743375<br>PE=1 SV=2                                     | 1.1E-19 | 1.61   |
|                                                            | Gene.38598_<br>L_san-<br>guineus_130<br>43_g.38598_<br>m.38598 | VA576_SCODE | Scoloptoxin SSD976<br>OS=Scolopendra<br>dehaani<br>OX=2609776 PE=1<br>SV=1                               | 4.3E-28 | 33.22  |
| Nemertide fam-<br>ily                                      | Gene.54610_<br>L_san-<br>guineus_233<br>00_g.54610_<br>m.54610 | NEMA1_LINLO | Nemertide alpha-1<br>(Fragment)<br>OS=Lineus longissi-<br>mus OX=88925<br>PE=1 SV=1                      | 1.8E-10 | 112.85 |
| Hemostasis impairing toxin                                 |                                                                |             |                                                                                                          |         |        |
| Snaclec family                                             | Gene.97854_<br>L_san-<br>guineus_752<br>37_g.97854_<br>m.97854 | SLDA_TRIAB  | Snaclec alboaggre-<br>gin-D subunit al-<br>pha OS=Tri-<br>meresurus albo-<br>labris OX=8765<br>PE=1 SV=1 | 3.9E-06 | 0.79   |
|                                                            | Gene.92649_<br>L_san-<br>guineus_664<br>72_g.92649_<br>m.92649 | SL1_SISCA   | Snaclec 1 OS=Sis-<br>trurus catenatus<br>edwardsii OX=8762<br>PE=2 SV=1                                  | 7.9E-09 | 2.22   |
|                                                            | Gene.90645_<br>L_san-<br>guineus_634<br>39_g.90645_<br>m.90645 | SLB1_DEIAC  | Snaclec agglucetin<br>subunit beta-1<br>OS=Deinagkistro-<br>don acutus<br>OX=36307 PE=1<br>SV=1          | 4.6E-13 | 0.58   |
| SNTX/VTX<br>toxin family                                   | Gene.97106_<br>L_san-<br>guineus_740<br>35_g.97106_<br>m.97106 | CTXA_SCOPL  | Cytolytic toxin-al-<br>pha OS=Scorpaena<br>plumieri<br>OX=274700 PE=1<br>SV=1                            | 3.1E-13 | 0.77   |

|                                                            |                                                                           |                   |                                                                                                                     |                |              |
|------------------------------------------------------------|---------------------------------------------------------------------------|-------------------|---------------------------------------------------------------------------------------------------------------------|----------------|--------------|
|                                                            | Gene.96616_<br>L_san-<br>guineus_731<br>87_g.96616_<br>m.96616            | CTXB_SCOPL        | Cytolytic toxin-beta<br>OS=Scorpaena<br>plumieri<br>OX=274700 PE=1<br>SV=1                                          | 3.5E-16        | 0.68         |
| True venom<br>lectin family                                | Gene.69521_<br>L_san-<br>guineus_365<br>92_g.69521_<br>m.69521            | LECM_THRJA        | C-type lectin lec-<br>toxin-Thr1<br>OS=Thrasops jack-<br>sonii OX=186611<br>PE=2 SV=1                               | 3.9E-08        | 1.31         |
| Other toxins candidates                                    |                                                                           |                   |                                                                                                                     |                |              |
| Glycoprotein<br>hormones subu-<br>nit alpha family         | Gene.62301_<br>L_san-<br>guineus_296<br>40_g.62301_<br>m.62301            | CTHA2_CONVC       | Thyrostimulin al-<br>pha-2 subunit<br>OS=Conus victoriae<br>OX=319920 PE=1<br>SV=1                                  | 1.9E-11        | 1.66         |
| EGF domain<br>peptide family                               | Gene.42600_<br>L_san-<br>guineus_152<br>90_g.42600_<br>m.42600            | TX18A_MANRB       | U18-myrmecitoxin-<br>Mri1a OS=Manica<br>rubida OX=219785<br>PE=1 SV=1                                               | 4E-09          | 2.55         |
| EGF-like, Sushi,<br>TSP type-1,<br>LDL-receptor<br>class A | Gene.17262_<br>L_san-<br>guineus_404<br>9_g.17262_m.<br>17262             | CTX_SEPES         | SE-cephalotoxin<br>OS=Sepia esculenta<br>OX=31210 PE=1<br>SV=1                                                      | 1.9E-97        | 3.62         |
| IGFBP N-termi-<br>nal, Kazal-like,<br>Ig-like C2-type      | Gene.31441_<br>L_san-<br>guineus_953<br>5_g.31441_m.<br>31441             | IGFBP_CUPSA       | Insulin-like growth<br>factor-binding pro-<br>tein-related protein<br>1 OS=Cupiennius<br>salei OX=6928 PE=2<br>SV=1 | 2.2E-52        | 3.46         |
| Insulin family                                             | Gene.87792_<br>L_san-<br>guineus_591<br>34_g.87792_<br>m.87792            | INS1_CONIM        | Con-Ins Im1<br>OS=Conus imperi-<br>alis OX=35631 PE=2<br>SV=1                                                       | 2.8E-06        | 1.14         |
| LDL-receptor<br>class A domain                             | Gene.18530_<br>L_san-<br>guineus_446<br>2_g.18530_m.<br>18530             | CPROH_CONVC       | Neuropeptide pro-<br>hormone-4 OS=Co-<br>nus victoriae<br>OX=319920 PE=1<br>SV=1                                    | 6.4E-23        | 11.06        |
| <b>Thyroglobu-<br/>lin_1,2 hits<br/>DOMAIN</b>             | <b>Gene.64710_<br/>L_san-<br/>guineus_318<br/>21_g.64710_<br/>m.64710</b> | <b>PN16_PHONI</b> | <b>U24-ctenitoxin-<br/>Pn1a OS=Phoneu-<br/>tria nigriventer<br/>OX=6918 PE=1<br/>SV=1</b>                           | <b>6.6E-07</b> | <b>25.79</b> |

**Table S10.** Toxin transcripts of *Notospermus geniculatus*. Unique toxins families are shown in bold.

| Protein family                                                                | Transcript ID                                     | Uniprot accession | Description                                                                                                       | E-value | Expression, TPM |
|-------------------------------------------------------------------------------|---------------------------------------------------|-------------------|-------------------------------------------------------------------------------------------------------------------|---------|-----------------|
| Pore-forming toxins                                                           |                                                   |                   |                                                                                                                   |         |                 |
| Cytotoxin A-III-like                                                          | Gene.128743_N_geniculatus_37710_g.128743_m.128743 | CXA3_CERLA        | Cytotoxin A-III OS=Cerebratulus lacteus OX=6221 PE=1 SV=1                                                         | 1.2E-38 | 204.37          |
| MACPF domain                                                                  | Gene.146480_N_geniculatus_47623_g.146480_m.146480 | PV21_POMCA        | Perivitellin-2 67 kda subunit OS=Pomacea canaliculata OX=400727 PE=1 SV=2                                         | 6.8E-19 | 0.32            |
|                                                                               | Gene.44557_N_geniculatus_6765_g.44557_m.44557     | PV21_POMMA        | Perivitellin-2 67 kda subunit OS=Pomacea maculata OX=1245466 PE=1 SV=1                                            | 7.8E-89 | 6.82            |
| Enzymes                                                                       |                                                   |                   |                                                                                                                   |         |                 |
| Arthropod phospholipase D family. Class II subfamily                          | Gene.147654_N_geniculatus_48338_g.147654_m.147654 | B1O_LOXCS         | Dermonecrotic toxin lcsictox-betaic1 (Fragment) OS=Loxosceles cf. Spinulosa (strain GJB-2008) OX=575952 PE=2 SV=1 | 1.9E-18 | 0.33            |
|                                                                               | Gene.73013_N_geniculatus_14545_g.73013_m.73013    | A1O_LOXGA         | Dermonecrotic toxin lgsictox-alphaic1 OS=Loxosceles gaucho OX=58216 PE=1 SV=1                                     | 5E-30   | 0.24            |
|                                                                               | Gene.74953_N_geniculatus_15169_g.74953_m.74953    | B1T1_LOXSN        | Dermonecrotic toxin lpsictox-betaie3i (Fragment) OS=Loxosceles spinulosa OX=571532 PE=2 SV=1                      | 2.2E-38 | 0.17            |
| Arthropod phospholipase D family. Class II subfamily. Class iia sub-subfamily | Gene.92607_N_geniculatus_21414_g.92607_m.92607    | A51_LOXIN         | Dermonecrotic toxin lisictox-alphav1 OS=Loxosceles intermedia OX=58218 PE=1 SV=1                                  | 2.3E-32 | 3.53            |
| Arthropod phospholipase D family. Class II subfamily. Class iib sub-subfamily | Gene.87640_N_geniculatus_19525_g.87640_m.87640    | B1Q_LOXIN         | Dermonecrotic toxin lisictox-betaid1 OS=Loxosceles intermedia OX=58218 PE=1 SV=1                                  | 9.2E-42 | 2.74            |

|                                                                       |                                                                    |                   |                                                                                                         |                |             |
|-----------------------------------------------------------------------|--------------------------------------------------------------------|-------------------|---------------------------------------------------------------------------------------------------------|----------------|-------------|
| Dnase II family                                                       | Gene.108701<br>_N_genicula-<br>tus_28112_g.<br>108701_m.10<br>8701 | DNA2_ACAPL        | Plancitoxin-1<br>OS=Acanthaster<br>planci OX=133434<br>PE=1 SV=1                                        | 3.2E-51        | 11.18       |
| Glycosyl hydro-<br>lase 56 family                                     | Gene.176515<br>_N_genicula-<br>tus_67089_g.<br>176515_m.17<br>6515 | HYAL1_MESMA       | Hyaluronidase-1<br>OS=Mesobuthus<br>martensii<br>OX=34649 PE=1<br>SV=2                                  | 2.3E-13        | 0.00        |
|                                                                       | Gene.143755<br>_N_genicula-<br>tus_46005_g.<br>143755_m.14<br>3755 | HYAL_ECHOC        | Hyaluronidase<br>OS=Echis ocellatus<br>OX=99586 PE=2<br>SV=1                                            | 1.8E-15        | 0.00        |
|                                                                       | Gene.149563<br>_N_genicula-<br>tus_49486_g.<br>149563_m.14<br>9563 | HYAL_CONCN        | Hyaluronidase con-<br>ohyal-Cn1 OS=Co-<br>nus consors<br>OX=101297 PE=1<br>SV=1                         | 9.3E-17        | 8.60        |
|                                                                       | Gene.88765_<br>N_genicula-<br>tus_19933_g.<br>88765_m.887<br>65    | HYAL_CONPU        | Hyaluronidase con-<br>ohyal-P1 OS=Conus<br>purpurascens<br>OX=41690 PE=1<br>SV=1                        | 2.1E-40        | 0.21        |
|                                                                       | Gene.101095<br>_N_genicula-<br>tus_24787_g.<br>101095_m.10<br>1095 | HUGA_APIME        | Hyaluronidase<br>OS=Apis mellifera<br>OX=7460 PE=1<br>SV=1                                              | 3.7E-60        | 0.00        |
| Flavin monoam-<br>ine oxidase fam-<br>ily. FIG1 subfam-<br>ily        | Gene.46686_<br>N_genicula-<br>tus_7256_g.4<br>6686_m.4668<br>6     | OXLA_CALRH        | L-amino-acid oxi-<br>dase OS=Cal-<br>loselasma rhodos-<br>toma OX=8717<br>PE=1 SV=2                     | 2.1E-46        | 0.27        |
| Nucleotide pyro-<br>phospha-<br>tase/phos-<br>phodiesterase<br>family | Gene.32725_<br>N_genicula-<br>tus_4280_g.3<br>2725_m.3272<br>5     | PDE2_CROAD        | Venom phos-<br>phodiesterase 2<br>OS=Crotalus ada-<br>manteus OX=8729<br>PE=1 SV=1                      | 5.2E-129       | 4.33        |
| Peptidase M12A<br>domain                                              | Gene.125887<br>_N_genicula-<br>tus_36255_g.<br>125887_m.12<br>5887 | VMPA4_LOXLA       | Astacin-like metal-<br>loprotease toxin 4<br>(Fragment)<br>OS=Loxosceles<br>laeta OX=58217<br>PE=2 SV=1 | 1.6E-06        | 0.00        |
| <b>Phospholipase<br/>A2 fam-<br/>ily. Group I sub-<br/>family</b>     | <b>Gene.120949<br/>_N_genicu-<br/>la-<br/>tus_33786_g.</b>         | <b>PA22_ACAPL</b> | <b>Phospholipase A2<br/>AP-PLA2-II<br/>OS=Acanthaster</b>                                               | <b>4.3E-11</b> | <b>0.84</b> |



|                                                                         | 120949_m.12<br>0949                                                |             | planci OX=133434<br>PE=1 SV=1                                                                               |         |       |
|-------------------------------------------------------------------------|--------------------------------------------------------------------|-------------|-------------------------------------------------------------------------------------------------------------|---------|-------|
| Phospholipase<br>A2 family. Group<br>I subfamily. D49<br>sub-subfamily  | Gene.143594<br>_N_genicula-<br>tus_45913_g.<br>143594_m.14<br>3594 | PA2B_MICCO  | Basic phospho-<br>lipase A2 OS=Mi-<br>crurus corallinus<br>OX=54390 PE=1<br>SV=1                            | 2E-12   | 0.00  |
| Phospholipase<br>A2 family. Group<br>III subfamily                      | Gene.118636<br>_N_genicula-<br>tus_32651_g.<br>118636_m.11<br>8636 | HEMI1_HEMLE | Phospholipase A2<br>hemilipin<br>OS=Hemiscorpius<br>lepturus<br>OX=520031 PE=1<br>SV=1                      | 1.2E-24 | 2.78  |
|                                                                         | Gene.72635_<br>N_genicula-<br>tus_14421_g.<br>72635_m.726<br>35    | PA23_HELSU  | Phospholipase A2<br>isozymes<br>PA3A/PA3B/PA5<br>OS=Heloderma<br>suspectum<br>OX=8554 PE=1<br>SV=3          | 4.5E-37 | 24.90 |
| Phospholipase<br>A2 family. Group<br>II subfamily. D49<br>sub-subfamily | Gene.90565_<br>N_genicula-<br>tus_20610_g.<br>90565_m.905<br>65    | PA2B1_VIPBN | Basic phospho-<br>lipase A2 chain<br>HDP-1P OS=Vipera<br>berus nikolskii<br>OX=1808362 PE=1<br>SV=1         | 1E-22   | 6.86  |
| Phospholipase<br>A2 family. Group<br>III subfamily                      | Gene.91289_<br>N_genicula-<br>tus_20900_g.<br>91289_m.912<br>89    | PA2A2_HELSU | Acidic phospho-<br>lipase A2 PA4<br>OS=Heloderma<br>suspectum<br>OX=8554 PE=1<br>SV=2                       | 3.7E-29 | 20.81 |
| Phospholipase B-<br>like family                                         | Gene.63302_<br>N_genicula-<br>tus_11598_g.<br>63302_m.633<br>02    | PLB_DRYCN   | Phospholipase-B 81<br>OS=Drysdalia coro-<br>noides OX=66186<br>PE=1 SV=1                                    | 0       | 11.03 |
| Venom metallo-<br>proteinase<br>(M12B) family                           | Gene.106790<br>_N_genicula-<br>tus_27259_g.<br>106790_m.10<br>6790 | VMP03_EULPE | Venom metallopro-<br>teinase 3 OS=Eulo-<br>phus pennicornis<br>OX=108749 PE=2<br>SV=1                       | 3.1E-07 | 2.57  |
| Venom metallo-<br>proteinase<br>(M12B) family. P-<br>III subfamily      | Gene.137591<br>_N_genicula-<br>tus_42492_g.<br>137591_m.13<br>7591 | VM34_DRYCN  | Zinc metallopro-<br>teinase-disintegrin-<br>like MTP4<br>OS=Drysdalia coro-<br>noides OX=66186<br>PE=1 SV=1 | 1.5E-23 | 0.00  |

|                                                                          |                                                    |             |                                                                                                              |         |        |
|--------------------------------------------------------------------------|----------------------------------------------------|-------------|--------------------------------------------------------------------------------------------------------------|---------|--------|
| Venom metalloproteinase (M12B) family. P-III subfamily. P-iiib subfamily | Gene.133242_N_genicula-tus_40099_g.133242_m.133242 | VM3HA_PROFL | Zinc metalloproteinase/disintegrin-like HR1a OS=Protobothrops flavoviridis OX=88087 PE=1 SV=1                | 4.6E-09 | 0.00   |
| Proteinase inhibitors                                                    |                                                    |             |                                                                                                              |         |        |
| Venom Kunitz-type family                                                 | Gene.160680_N_genicula-tus_56483_g.160680_m.160680 | VKTHD_DENAN | Kunitz-type serine protease inhibitor homolog delta-dendrotoxin OS=Dendroaspis angusticeps OX=8618 PE=1 SV=1 | 2.1E-09 | 0.00   |
|                                                                          | Gene.132845_N_genicula-tus_39889_g.132845_m.132845 | VKT4_PSETT  | Kunitz-type serine protease inhibitor textilinin-4 OS=Pseudonaja textilis textilis OX=169397 PE=2 SV=1       | 3E-09   | 3.55   |
|                                                                          | Gene.159195_N_genicula-tus_55539_g.159195_m.159195 | VKTCT_OPHHA | Kunitz-type serine protease inhibitor TCI OS=Ophiophagus hannah OX=8665 PE=1 SV=1                            | 3.2E-16 | 6.38   |
|                                                                          | Gene.123192_N_genicula-tus_34877_g.123192_m.123192 | VKT1_TRILK  | Kunitz-type U19-barytoxin-Tl1a OS=Trittame loki OX=1295018 PE=2 SV=2                                         | 8E-16   | 0.00   |
|                                                                          | Gene.147622_N_genicula-tus_48319_g.147622_m.147622 | VKT1_OXYMI  | Kunitz-type serine protease inhibitor microlepidin-1 OS=Oxyuranus microlepidotus OX=111177 PE=2 SV=1         | 1.4E-19 | 142.80 |
|                                                                          | Gene.142227_N_genicula-tus_45116_g.142227_m.142227 | VKT3_BITGA  | Kunitz-type serine protease inhibitor bitisilin-3 (Fragment) OS=Bitis gabonica OX=8694 PE=2 SV=1             | 1.9E-31 | 32.21  |
| Venom Kunitz-type family. Sea anemone type 2 potassium                   | Gene.87698_N_genicula-tus_19544_g.87698_m.87698    | VKT1_ANTAF  | PI-actitoxin-Axm2a OS=Anthopleura aff. Xanthogrammica OX=152178 PE=1 SV=1                                    | 9.5E-20 | 0.00   |

| channel toxin subfamily  |                                                 | Ion channel inhibitor activity |                                                                                                   |         |      |
|--------------------------|-------------------------------------------------|--------------------------------|---------------------------------------------------------------------------------------------------|---------|------|
| Conotoxin I3 superfamily | Gene.158909_N_geniculus_55362_g.158909_m.158909 | I3B2_CONPL                     | Conotoxin Pu11.2 OS=Conus pulicarius OX=93154 PE=3 SV=1                                           | 9.7E-06 | 3.61 |
| CRISP family             | Gene.178605_N_geniculus_68509_g.178605_m.178605 | VA3_DINQU                      | Venom allergen 3 homolog OS=Dinoponera quadricaps OX=609295 PE=2 SV=1                             | 2.4E-08 | 0.00 |
|                          | Gene.43244_N_geniculus_6474_g.43244_m.43244     | CRVP2_DISTY                    | Cysteine-rich venom protein DIS2 OS=Dispholidus typus OX=46295 PE=2 SV=1                          | 9.2E-08 | 0.71 |
|                          | Gene.71706_N_geniculus_14138_g.71706_m.71706    | CRVP_CROAT                     | Cysteine-rich venom protein catrin OS=Crotalus atrox OX=8730 PE=1 SV=1                            | 1.5E-24 | 0.16 |
|                          | Gene.106517_N_geniculus_27136_g.106517_m.106517 | CRVP_OXYMI                     | Cysteine-rich venom protein pseudochetoxin-like OS=Oxyuranus microlepidotus OX=111177 PE=2 SV=1   | 3.5E-30 | 0.87 |
|                          | Gene.79877_N_geniculus_16779_g.79877_m.79877    | CRVP_PHIOL                     | Cysteine-rich venom protein OS=Philodryas olfersii OX=120305 PE=2 SV=1                            | 7E-34   | 2.01 |
|                          | Gene.109329_N_geniculus_28397_g.109329_m.109329 | CRVP_LEIMD                     | Cysteine-rich venom protein LEI1 (Fragment) OS=Leioheterodon mada-gascariensis OX=46577 PE=1 SV=1 | 1.6E-34 | 1.99 |
|                          | Gene.110897_N_geniculus_29081_g.110897_m.110897 | MR30_CONMR                     | Cysteine-rich venom protein Mr30 OS=Conus marmoreus OX=42752 PE=1 SV=1                            | 2.2E-34 | 0.91 |

|                                                                                                    |                                                                    |             |                                                                                                           |         |       |
|----------------------------------------------------------------------------------------------------|--------------------------------------------------------------------|-------------|-----------------------------------------------------------------------------------------------------------|---------|-------|
|                                                                                                    | Gene.71903_<br>N_genicula-<br>tus_14199_g.<br>71903_m.719<br>03    | CRVP_PSETE  | Cysteine-rich<br>venom protein<br>pseudecheto-<br>xin-like OS=Pseudonaja<br>textilis OX=8673<br>PE=1 SV=1 | 3.5E-33 | 0.48  |
|                                                                                                    | Gene.92364_<br>N_genicula-<br>tus_21318_g.<br>92364_m.923<br>64    | TX31_CONTE  | Cysteine-rich<br>venom protein<br>OS=Conus textile<br>OX=6494 PE=1<br>SV=1                                | 7.7E-34 | 2.06  |
|                                                                                                    | Gene.33460_<br>N_genicula-<br>tus_4413_g.3<br>3460_m.3346<br>0     | CRVP_AUSSU  | Cysteine-rich<br>venom protein<br>OS=Austrelaps su-<br>perbus OX=29156<br>PE=2 SV=1                       | 3.2E-34 | 0.63  |
| CRISP fam-<br>ily. Venom aller-<br>gen 5-like sub-<br>family                                       | Gene.111771_<br>N_genicula-<br>tus_29480_g.<br>111771_m.11<br>1771 | VA5_VESPE   | Venom allergen 5<br>OS=Vespula pen-<br>sylvanica<br>OX=30213 PE=1<br>SV=1                                 | 4.5E-54 | 0.00  |
| Sea anemone<br>structural class 9a<br>family                                                       | Gene.63263_<br>N_genicula-<br>tus_11585_g.<br>63263_m.632<br>63    | TX9A_ANTMC  | Delta-actitoxin-<br>Amc1a OS=Anthe-<br>opsis maculata<br>OX=280228 PE=1<br>SV=1                           | 2.5E-11 | 19.21 |
| Scoloptoxin-05<br>family                                                                           | Gene.93901_<br>N_genicula-<br>tus_21904_g.<br>93901_m.939<br>01    | TX53A_ETHRU | U-scoloptoxin(05)-<br>Er3a OS=Eth-<br>mostigmus ru-<br>bripes OX=62613<br>PE=2 SV=1                       | 2.7E-06 | 0.47  |
| Scoloptoxin-11<br>family                                                                           | Gene.109455_<br>N_genicula-<br>tus_28449_g.<br>109455_m.10<br>9455 | TXB2A_SCOAL | U-scoloptoxin(11)-<br>Sa2a OS=Scolopen-<br>dra alternans<br>OX=1329349 PE=2<br>SV=1                       | 1.3E-06 | 2.36  |
| Venom Kunitz-<br>type family. Sea<br>anemone type 2<br>potassium chan-<br>nel toxin subfam-<br>ily | Gene.155096_<br>N_genicula-<br>tus_52945_g.<br>155096_m.15<br>5096 | VKT7_ANEVI  | U-actitoxin-Avd3j<br>OS=Anemonia vi-<br>ridis OX=51769<br>PE=3 SV=1                                       | 3.7E-19 | 4.04  |
| Hemostasis impairing toxin                                                                         |                                                                    |             |                                                                                                           |         |       |
| Snaclec family                                                                                     | Gene.60567_<br>N_genicula-<br>tus_10834_g.<br>60567_m.605<br>67    | SLA4_TRIAB  | Snaclec alboaggre-<br>gin-A subunit beta'<br>OS=Trimeresurus<br>albolabris OX=8765<br>PE=1 SV=1           | 4E-06   | 1.01  |
|                                                                                                    | Gene.161623_<br>N_genicula-<br>tus_57108_g.                        | SLA_BOTIN   | Snaclec bothroin-<br>sularin subunit al-<br>pha OS=Bothrops                                               | 1.8E-13 | 0.00  |

|                          |                                                                    |            |                                                                                                           |         |       |
|--------------------------|--------------------------------------------------------------------|------------|-----------------------------------------------------------------------------------------------------------|---------|-------|
|                          | 161623_m.16<br>1623                                                |            | insularis OX=8723<br>PE=1 SV=1                                                                            |         |       |
|                          | Gene.85733_<br>N_genicula-<br>tus_18850_g.<br>85733_m.857<br>33    | SLCB_DEIAC | Snaclec agkicetin-C<br>subunit beta<br>OS=Deinagkistro-<br>don acutus<br>OX=36307 PE=1<br>SV=1            | 4.1E-12 | 13.03 |
|                          | Gene.50710_<br>N_genicula-<br>tus_8234_g.5<br>0710_m.5071<br>0     | SLA_DABSI  | Snaclec dabocetin<br>subunit alpha<br>OS=Daboia siamen-<br>sis OX=343250 PE=1<br>SV=1                     | 4.5E-15 | 0.36  |
| SNTX/VTX toxin<br>family | Gene.184803_<br>N_genicula-<br>tus_72767_g.<br>184803_m.18<br>4803 | VTXB_SYNVE | Verrucotoxin subu-<br>nit beta OS=Synan-<br>ceia verrucosa<br>OX=51996 PE=1<br>SV=3                       | 2.7E-22 | 0.00  |
|                          | Gene.70470_<br>N_genicula-<br>tus_13754_g.<br>70470_m.704<br>70    | STXB_SYNHO | Stonustoxin subu-<br>nit beta OS=Synan-<br>ceia horrida<br>OX=13279 PE=1<br>SV=3                          | 1.3E-73 | 0.37  |
|                          | Gene.83884_<br>N_genicula-<br>tus_18187_g.<br>83884_m.838<br>84    | CTXA_SCOPL | Cytolytic toxin-al-<br>pha OS=Scorpaena<br>plumieri<br>OX=274700 PE=1<br>SV=1                             | 2.9E-74 | 0.72  |
|                          | Gene.58615_<br>N_genicula-<br>tus_10309_g.<br>58615_m.586<br>15    | STXA_SYNHO | Stonustoxin subu-<br>nit alpha<br>OS=Synanceia hor-<br>rida OX=13279<br>PE=1 SV=3                         | 9.2E-89 | 0.78  |
|                          | Gene.49719_<br>N_genicula-<br>tus_7994_g.4<br>9719_m.4971<br>9     | STXA_SYNVE | Neoverrucotoxin<br>subunit alpha<br>OS=Synanceia ver-<br>rucosa OX=51996<br>PE=1 SV=1                     | 5.4E-97 | 3.16  |
|                          | Gene.16256_<br>N_genicula-<br>tus_1578_g.1<br>6256_m.1625<br>6     | STXB_SYNVE | Neoverrucotoxin<br>subunit beta<br>OS=Synanceia ver-<br>rucosa OX=51996<br>PE=1 SV=1                      | 1.9E-93 | 3.89  |
|                          | Gene.174251_<br>N_genicula-<br>tus_65555_g.<br>174251_m.17<br>4251 | LECM_NOTSC | C-type lectin man-<br>nose-binding iso-<br>form OS=Notechis<br>scutatus scutatus<br>OX=70142 PE=2<br>SV=1 | 2.7E-14 | 0.78  |
| Other toxins candidates  |                                                                    |            |                                                                                                           |         |       |

|                                                       |                                                                    |             |                                                                                                                     |         |       |
|-------------------------------------------------------|--------------------------------------------------------------------|-------------|---------------------------------------------------------------------------------------------------------------------|---------|-------|
| Elevenin-like                                         | Gene.89934_<br>N_genicula-<br>tus_20379_g.<br>89934_m.899<br>34    | CELE_CONVC  | Elevenin-Vc1<br>OS=Conus victoriae<br>OX=319920 PE=1<br>SV=1                                                        | 5.5E-06 | 1.26  |
| IGFBP N-termi-<br>nal, Kazal-like,<br>Ig-like C2-type | Gene.67877_<br>N_genicula-<br>tus_12957_g.<br>67877_m.678<br>77    | IGFBP_CUPSA | Insulin-like growth<br>factor-binding pro-<br>tein-related protein<br>1 OS=Cupiennius<br>salei OX=6928 PE=2<br>SV=1 | 4.4E-60 | 16.63 |
| Insulin family                                        | Gene.98850_<br>N_genicula-<br>tus_23870_g.<br>98850_m.988<br>50    | INS1_CONIM  | Con-Ins Im1<br>OS=Conus imperi-<br>alis OX=35631 PE=2<br>SV=1                                                       | 3.2E-09 | 5.51  |
|                                                       | Gene.86492_<br>N_genicula-<br>tus_19114_g.<br>86492_m.864<br>92    | INS2_CONIM  | Con-Ins Im2<br>OS=Conus imperi-<br>alis OX=35631 PE=2<br>SV=1                                                       | 6.6E-15 | 1.98  |
|                                                       | Gene.94322_<br>N_genicula-<br>tus_22061_g.<br>94322_m.943<br>22    | INS2C_CONFO | Con-Ins F2c<br>OS=Conus floridu-<br>lus OX=97180 PE=1<br>SV=1                                                       | 6.1E-10 | 0.00  |
| Glycoprotein hor-<br>mones subunit al-<br>pha family  | Gene.96349_<br>N_genicula-<br>tus_22878_g.<br>96349_m.963<br>49    | CTHA2_CONVC | Thyrostimulin al-<br>pha-2 subunit<br>OS=Conus victoriae<br>OX=319920 PE=1<br>SV=1                                  | 2.8E-17 | 2.97  |
| Glycoprotein hor-<br>mones subunit<br>beta family     | Gene.61031_<br>N_genicula-<br>tus_10955_g.<br>61031_m.610<br>31    | CTHB5_CONVC | Thyrostimulin beta-<br>5 subunit OS=Co-<br>nus victoriae<br>OX=319920 PE=2<br>SV=1                                  | 1.3E-22 | 1.49  |
| LDL-receptor<br>class A domain                        | Gene.107185_<br>N_genicula-<br>tus_27436_g.<br>107185_m.10<br>7185 | CPROH_CONVC | Neuropeptide pro-<br>hormone-4 OS=Co-<br>nus victoriae<br>OX=319920 PE=1<br>SV=1                                    | 8E-25   | 5.63  |
| NGF-beta family                                       | Gene.108644_<br>N_genicula-<br>tus_28085_g.<br>108644_m.10<br>8644 | NGFV_NAJAT  | Venom nerve<br>growth factor<br>OS=Naja atra<br>OX=8656 PE=1<br>SV=1                                                | 4.7E-10 | 0.23  |
|                                                       | Gene.122061_<br>N_genicula-<br>tus_34320_g.<br>122061_m.12<br>2061 | NGFV1_PSEAU | Venom nerve<br>growth factor 1<br>OS=Pseudechis<br>australis OX=8670<br>PE=2 SV=1                                   | 2.1E-10 | 0.19  |

|                                            |                                                                    |             |                                                                                                         |         |      |
|--------------------------------------------|--------------------------------------------------------------------|-------------|---------------------------------------------------------------------------------------------------------|---------|------|
|                                            | Gene.105448<br>_N_genicula-<br>tus_26669_g.<br>105448_m.10<br>5448 | NGFV_DRYCN  | Venom nerve<br>growth factor<br>OS=Drysdalia coro-<br>noides OX=66186<br>PE=2 SV=1                      | 6.1E-13 | 3.83 |
|                                            | Gene.106335<br>_N_genicula-<br>tus_27053_g.<br>106335_m.10<br>6335 | NGFV_PSEPO  | Venom nerve<br>growth factor<br>OS=Pseudechis<br>porphyriacus<br>OX=8671 PE=2<br>SV=1                   | 4.6E-14 | 0.00 |
|                                            | Gene.108412<br>_N_genicula-<br>tus_27983_g.<br>108412_m.10<br>8412 | NGFV2_NAJSP | Venom nerve<br>growth factor 2<br>OS=Naja sputatrix<br>OX=33626 PE=2<br>SV=1                            | 9.5E-18 | 0.29 |
| PDGF/VEGF<br>growth factor<br>family       | Gene.65140_<br>N_genicula-<br>tus_12143_g.<br>65140_m.651<br>40    | VEGFA_VIPAA | Vascular endothe-<br>lial growth factor A<br>OS=Vipera ammo-<br>dytes ammodytes<br>OX=8705 PE=2<br>SV=1 | 4.2E-09 | 3.28 |
| Venom comple-<br>ment C3 homolog<br>family | Gene.113391<br>_N_genicula-<br>tus_30216_g.<br>113391_m.11<br>3391 | VCO3_NAJKA  | Cobra venom factor<br>OS=Naja kaouthia<br>OX=8649 PE=1<br>SV=1                                          | 2.5E-24 | 0.48 |

Table S11. Toxin transcripts of *Riseriellus occultus*.

| Protein family                                                      | Transcript ID                                                | Uniprot accession | Description                                                                                                       | E-value | Expression, TPM |
|---------------------------------------------------------------------|--------------------------------------------------------------|-------------------|-------------------------------------------------------------------------------------------------------------------|---------|-----------------|
| Pore-forming toxins                                                 |                                                              |                   |                                                                                                                   |         |                 |
| Cytotoxin A-III-like                                                | Gene.68287_<br>R_occul-<br>tus_26947_g.<br>68287_m.682<br>87 | CXA3_CERLA        | Cytotoxin A-III<br>OS=Cerebratulus<br>lacteus OX=6221<br>PE=1 SV=1                                                | 1.7E-44 | 57.67           |
| MACPF domain                                                        | Gene.49434_<br>R_occul-<br>tus_13168_g.<br>49434_m.494<br>34 | PV21_POMMA        | Perivitellin-2 67<br>kda subunit<br>OS=Pomacea macu-<br>lata OX=1245466<br>PE=1 SV=1                              | 8.2E-59 | 8.34            |
| Enzymes                                                             |                                                              |                   |                                                                                                                   |         |                 |
| Arthropod phos-<br>pholipase D fam-<br>ily. Class II sub-<br>family | Gene.90642_<br>R_occul-<br>tus_56425_g.<br>90642_m.906<br>42 | B1T1_LOXSN        | Dermonecrotic<br>toxin Ispisictox-be-<br>taie3i (Fragment)<br>OS=Loxosceles spi-<br>nulosa OX=571532<br>PE=2 SV=1 | 1.1E-13 | 1.86            |

|                                                                       |                                                              |             |                                                                                                                                           |          |       |
|-----------------------------------------------------------------------|--------------------------------------------------------------|-------------|-------------------------------------------------------------------------------------------------------------------------------------------|----------|-------|
|                                                                       | Gene.72081_<br>R_occul-<br>tus_30849_g.<br>72081_m.720<br>81 | B1O_LOXCS   | Dermonecrotic<br>toxin lcsictox-be-<br>taic1 (Fragment)<br>OS=Loxosceles cf.<br>Spinulosa (strain<br>GJB-2008)<br>OX=575952 PE=2<br>SV=1  | 2E-14    | 6.05  |
|                                                                       | Gene.75604_<br>R_occul-<br>tus_34760_g.<br>75604_m.756<br>04 | A1MA4_LOXDE | Dermonecrotic<br>toxin ldsictox-al-<br>phaib3aiv (Frag-<br>ment) OS=Loxosce-<br>les deserta<br>OX=424440 PE=2<br>SV=1                     | 3.6E-16  | 1.53  |
|                                                                       | Gene.91645_<br>R_occul-<br>tus_58150_g.<br>91645_m.916<br>45 | B1V_SICCD   | Dermonecrotic<br>toxin sdsictox-be-<br>taif1 (Fragment)<br>OS=Sicarius cf. Da-<br>marensis (strain<br>GJB-2008)<br>OX=575956 PE=2<br>SV=1 | 1.4E-18  | 6.47  |
|                                                                       | Gene.56378_<br>R_occul-<br>tus_17338_g.<br>56378_m.563<br>78 | DTPLD_HEMLE | Dermonecrotic<br>toxin HI-PLD1<br>OS=Hemiscorpius<br>lepturus<br>OX=520031 PE=1<br>SV=1                                                   | 1.9E-22  | 7.64  |
| Dnase II family                                                       | Gene.14621_<br>R_occul-<br>tus_1659_g.1<br>4621_m.1462<br>1  | DNA2_ACAPL  | Plancitoxin-1<br>OS=Acanthaster<br>planci OX=133434<br>PE=1 SV=1                                                                          | 1.6E-98  | 3.51  |
| Flavin monoam-<br>ine oxidase fam-<br>ily. FIG1 subfam-<br>ily        | Gene.28153_<br>R_occul-<br>tus_4706_g.2<br>8153_m.2815<br>3  | OXLA_CALRH  | L-amino-acid oxi-<br>dase OS=Cal-<br>loselasma rhodos-<br>toma OX=8717<br>PE=1 SV=2                                                       | 2.7E-44  | 16.20 |
| Natterin family                                                       | Gene.59007_<br>R_occul-<br>tus_19209_g.<br>59007_m.590<br>07 | NATT4_THANI | Natterin-4<br>OS=Thalas-<br>sophryne nattereri<br>OX=289382 PE=2<br>SV=1                                                                  | 3.9E-14  | 7.80  |
| Nucleotide pyro-<br>phospha-<br>tase/phos-<br>phodiesterase<br>family | Gene.28090_<br>R_occul-<br>tus_4687_g.2<br>8090_m.2809<br>0  | PDE2_CROAD  | Venom phos-<br>phodiesterase 2<br>OS=Crotalus ada-<br>manteus OX=8729<br>PE=1 SV=1                                                        | 8.9E-180 | 5.68  |



|                                                               |                                             |             |                                                                                                    |         |        |
|---------------------------------------------------------------|---------------------------------------------|-------------|----------------------------------------------------------------------------------------------------|---------|--------|
| Phospholipase A2 family. Group I subfamily. D49 sub-subfamily | Gene.67220_R_occultus_25928_g.67220_m.67220 | PA2TA_OXYSC | Basic phospholipase A2 taipoxin alpha chain OS=Oxyuranus scutellatus scutellatus OX=8667 PE=1 SV=1 | 6.3E-21 | 3.86   |
|                                                               | Gene.34929_R_occultus_6835_g.34929_m.34929  | PA2A2_NAJME | Acidic phospholipase A2 DE-II OS=Naja melanoleuca OX=8643 PE=1 SV=1                                | 8.6E-25 | 40.35  |
| Phospholipase A2 family. Group III subfamily                  | Gene.58712_R_occultus_19007_g.58712_m.58712 | PA2_XYLAI   | Phospholipase A(2) OS=Xylocopa appendiculata circumvolans OX=135722 GN=PLA2 PE=1 SV=1              | 9.9E-24 | 2.14   |
|                                                               | Gene.13654_R_occultus_1496_g.13654_m.13654  | PA2A2_HELSU | Acidic phospholipase A2 PA4 OS=Heloderma suspectum OX=8554 PE=1 SV=2                               | 1.9E-32 | 3.84   |
| Phospholipase B-like family                                   | Gene.14123_R_occultus_1576_g.14123_m.14123  | PLB_DRYCN   | Phospholipase-B 81 OS=Drysdalia coronoides OX=66186 PE=1 SV=1                                      | 0       | 2.06   |
| Venom metalloproteinase (M12B) family. P-I subfamily          | Gene.88864_R_occultus_53388_g.88864_m.88864 | VM1F_MACLB  | Snake venom metalloproteinase fibrolase OS=Macrovipera lebetina OX=8709 PE=1 SV=1                  | 1.2E-15 | 1.06   |
| Proteinase inhibitors                                         |                                             |             |                                                                                                    |         |        |
| Venom Kunitz-type family                                      | Gene.52630_R_occultus_14975_g.52630_m.52630 | VKT2_BITGA  | Kunitz-type serine protease inhibitor bitisilin-2 OS=Bitis gabonica OX=8694 PE=1 SV=1              | 1.1E-15 | 32.42  |
|                                                               | Gene.83158_R_occultus_44528_g.83158_m.83158 | VKT_BOMTE   | Kunitz-type serine protease inhibitor Bt-KTI OS=Bombus terrestris OX=30195 PE=2 SV=1               | 6.5E-17 | 327.70 |

|                                                                                                    |                                                              |             |                                                                                                                        |         |        |
|----------------------------------------------------------------------------------------------------|--------------------------------------------------------------|-------------|------------------------------------------------------------------------------------------------------------------------|---------|--------|
|                                                                                                    | Gene.71074_<br>R_occul-<br>tus_29761_g.<br>71074_m.710<br>74 | VKT3_BITGA  | Kunitz-type serine<br>protease inhibitor<br>bitisilin-3 (Frag-<br>ment) OS=Bitis ga-<br>bonica OX=8694<br>PE=2 SV=1    | 3.5E-26 | 3.44   |
| Venom Kunitz-<br>type family. Sea<br>anemone type 2<br>potassium chan-<br>nel toxin subfam-<br>ily | Gene.46126_<br>R_occul-<br>tus_11483_g.<br>46126_m.461<br>26 | ATPI1_ACTTE | Actinia tenebrosa<br>protease inhibitors<br>OS=Actinia tene-<br>brosa OX=6105<br>PE=1 SV=1                             | 9.8E-43 | 8.83   |
| Ion channel inhibitor activity                                                                     |                                                              |             |                                                                                                                        |         |        |
| CRISP family                                                                                       | Gene.62190_<br>R_occul-<br>tus_21590_g.<br>62190_m.621<br>90 | CRVP_HOPST  | Cysteine-rich<br>venom protein<br>pseudechetoxin-<br>like OS=Hop-<br>locephalus ste-<br>phensii OX=196418<br>PE=2 SV=1 | 8E-14   | 314.25 |
|                                                                                                    | Gene.51903_<br>R_occul-<br>tus_14556_g.<br>51903_m.519<br>03 | TX31_CONTE  | Cysteine-rich<br>venom protein<br>OS=Conus textile<br>OX=6494 PE=1<br>SV=1                                             | 2.4E-26 | 331.75 |
|                                                                                                    | Gene.44413_<br>R_occul-<br>tus_10655_g.<br>44413_m.444<br>13 | MR30_CONMR  | Cysteine-rich<br>venom protein<br>Mr30 OS=Conus<br>marmoreus<br>OX=42752 PE=1<br>SV=1                                  | 4.1E-32 | 54.22  |
|                                                                                                    | Gene.49813_<br>R_occul-<br>tus_13368_g.<br>49813_m.498<br>13 | CRVP_PSEAU  | Cysteine-rich<br>venom protein<br>pseudechetoxin<br>OS=Pseudechis<br>australis OX=8670<br>PE=1 SV=1                    | 1.9E-36 | 3.40   |
| CRISP fam-<br>ily. Venom aller-<br>gen 5-like sub-<br>family                                       | Gene.59141_<br>R_occul-<br>tus_19305_g.<br>59141_m.591<br>41 | VA543_SCODE | Scoloptoxin SSD43<br>OS=Scolopendra<br>dehaani<br>OX=2609776 PE=1<br>SV=1                                              | 6E-30   | 113.83 |
| Nemertide family                                                                                   | Gene.67160_<br>R_occul-<br>tus_25870_g.<br>67160_m.671<br>60 | NEMA1_LINLO | Nemertide alpha-1<br>(Fragment)<br>OS=Lineus longissi-<br>mus OX=88925<br>PE=1 SV=1                                    | 6.4E-12 | 2.02   |
| Scoloptoxin-11<br>family                                                                           | Gene.85657_<br>R_occul-<br>tus_48208_g.                      | TX14B_SCODE | Scoloptoxin SSD20<br>(Fragment)<br>OS=Scolopendra<br>dehaani                                                           | 3.7E-36 | 2.62   |

|                                                                                |                                              |             |                                                                                      |         |        |
|--------------------------------------------------------------------------------|----------------------------------------------|-------------|--------------------------------------------------------------------------------------|---------|--------|
|                                                                                | 85657_m.856<br>57                            |             | OX=2609776 PE=1<br>SV=1                                                              |         |        |
| Venom Kunitz-type family. Sea anemone type 2 potassium channel toxin subfamily | Gene.45107_R_occul-tus_10986_g.45107_m.45107 | VKT53_ANEVI | Kappapi-actitoxin-Avd3e OS=Anemonia viridis OX=51769 PE=3 SV=1                       | 4.1E-18 | 168.01 |
| Hemostasis impairing toxin                                                     |                                              |             |                                                                                      |         |        |
| Snaclec family                                                                 | Gene.68472_R_occul-tus_27105_g.68472_m.68472 | SL9A_CROAD  | C-type lectin 9a OS=Crotalus adamanteus OX=8729 PE=1 SV=1                            | 1.4E-08 | 89.97  |
|                                                                                | Gene.38071_R_occul-tus_7965_g.38071_m.38071  | SLBB_TRIAB  | Snaclec alboaggregin-B subunit beta OS=Trimeresurus albolabris OX=8765 PE=1 SV=2     | 2.5E-08 | 6.70   |
| SNTX/VTX toxin family                                                          | Gene.24886_R_occul-tus_3814_g.24886_m.24886  | STXA_SYNVE  | Neoverrucotoxin subunit alpha OS=Synanceia verrucosa OX=51996 PE=1 SV=1              | 4.9E-42 | 5.02   |
|                                                                                | Gene.45481_R_occul-tus_11159_g.45481_m.45481 | STXB_SYNVE  | Neoverrucotoxin subunit beta OS=Synanceia verrucosa OX=51996 PE=1 SV=1               | 3.5E-78 | 4.53   |
|                                                                                | Gene.911_R_occul-tus_40_g.911_m.911          | STXA_SYNHO  | Stonustoxin subunit alpha OS=Synanceia horrida OX=13279 PE=1 SV=3                    | 8.5E-88 | 6.48   |
|                                                                                | Gene.7321_R_occul-tus_590_g.7321_m.7321      | CTXA_SCOPL  | Cytolytic toxin-alpha OS=Scorpaena plumieri OX=274700 PE=1 SV=1                      | 6.8E-95 | 4.72   |
| True venom lectin family                                                       | Gene.91840_R_occul-tus_58524_g.91840_m.91840 | LECG_THANI  | Galactose-specific lectin nattererin OS=Thalassophryne nattereri OX=289382 PE=1 SV=1 | 4.5E-10 | 3.12   |
| Other toxins candidates                                                        |                                              |             |                                                                                      |         |        |
| IGFBP N-terminal domain                                                        | Gene.96120_R_occul-tus_66363_g.              | VP302_LYCMC | Venom protein 302 OS=Lychas mucronatus OX=172552 PE=2 SV=1                           | 2E-06   | 1.61   |

|                                               |                                               |             |                                                                                                    |          |       |
|-----------------------------------------------|-----------------------------------------------|-------------|----------------------------------------------------------------------------------------------------|----------|-------|
| 96120_m.96120                                 |                                               |             |                                                                                                    |          |       |
| IGFBP N-terminal, Kazal-like, Ig-like C2-type | Gene.24185_R_occutus_3642_g.24185_m.24185_5   | IGFBP_CUPSA | Insulin-like growth factor-binding protein-related protein 1 OS=Cupiennius salei OX=6928 PE=2 SV=1 | 1.8E-52  | 7.69  |
| Insulin family                                | Gene.89464_R_occutus_54345_g.89464_m.89464_64 | INS1_CONIM  | Con-Ins Im1 OS=Conus imperialis OX=35631 PE=2 SV=1                                                 | 7.8E-07  | 5.56  |
|                                               | Gene.47239_R_occutus_12039_g.47239_m.47239_39 | INS1_CONFO  | Con-Ins F1 OS=Conus floridulus OX=97180 PE=1 SV=1                                                  | 9.9E-10  | 7.39  |
| LDL-receptor class A domain                   | Gene.38355_R_occutus_8068_g.38355_m.38355_5   | CPROH_CONVC | Neuropeptide pro-hormone-4 OS=Conus victoriae OX=319920 PE=1 SV=1                                  | 1.5E-24  | 28.02 |
| -SE-CTX-like                                  | Gene.14754_R_occutus_1682_g.14754_m.14754_4   | CTXL_ACRMI  | Cephalotoxin-like protein (Fragment) OS=Acropora millepora OX=45264 PE=1 SV=1                      | 3.7E-144 | 46.79 |
| Vasopressin/oxytocin family                   | Gene.65983_R_occutus_24746_g.65983_m.65983_83 | CESS2_CONMO | Conopresin/conophysin, isoform 2 (Fragment) OS=Conus monile OX=351660 PE=2 SV=1                    | 4.3E-24  | 3.06  |

Table S12. Toxin transcripts of *Amphiporous lactifloreus*.

| Protein family      | Transcript ID                                  | Uniprot accession | Description                                                               | E-value | Expression, TPM |
|---------------------|------------------------------------------------|-------------------|---------------------------------------------------------------------------|---------|-----------------|
| Pore-forming toxins |                                                |                   |                                                                           |         |                 |
| MACPF domain        | Gene.38401_Amphiporous_6886_g.38401_m.38401_01 | PV21_POMCA        | Perivitellin-2 67 kda subunit OS=Pomacea canaliculata OX=400727 PE=1 SV=2 | 8.7E-39 | 2.49            |
|                     | Gene.31194_Amphiporous_4943_g.31194_m.31194_94 | PV21_POMMA        | Perivitellin-2 67 kda subunit OS=Pomacea maculata OX=1245466 PE=1 SV=1    | 1.2E-73 | 435.18          |

| Enzymes                                                                  |                                                                          |                    |                                                                                                                                              |                |               |
|--------------------------------------------------------------------------|--------------------------------------------------------------------------|--------------------|----------------------------------------------------------------------------------------------------------------------------------------------|----------------|---------------|
| Dnase II family                                                          | Gene.56234_<br>Amphipo-<br>rous_13892_<br>g.56234_m.56<br>234            | DNA2_ACAPL         | Plancitoxin-1<br>OS=Acanthaster<br>planci OX=133434<br>PE=1 SV=1                                                                             | 3.6E-36        | 2.00          |
| Glycosyl hydro-<br>lase 56 family                                        | Gene.65205_<br>Amphipo-<br>rous_20146_<br>g.65205_m.65<br>205            | HUGA_APIME         | Hyaluronidase<br>OS=Apis mellifera<br>OX=7460 PE=1<br>SV=1                                                                                   | 8.9E-14        | 3.13          |
|                                                                          | Gene.65057_<br>Amphipo-<br>rous_20037_<br>g.65057_m.65<br>057            | HYAL_CONPU         | Hyaluronidase con-<br>ohyal-P1 OS=Conus<br>purpurascens<br>OX=41690 PE=1<br>SV=1                                                             | 5.8E-12        | 2.47          |
|                                                                          | Gene.34524_<br>Amphipo-<br>rous_5791_g.<br>34524_m.345<br>24             | HYAL1_MESMA        | Hyaluronidase-1<br>OS=Mesobuthus<br>martensii<br>OX=34649 PE=1<br>SV=2                                                                       | 2.4E-59        | 5.82          |
| <b>Peptidase M12A<br/>domain,<br/>Allrgn_V5/Tpx1_<br/>CS, CAP_domain</b> | <b>Gene.50662_<br/>Amphipo-<br/>rous_11207_<br/>g.50662_m.50<br/>662</b> | <b>VMPA2_LOXIN</b> | <b>Astacin-like metal-<br/>loprotease toxin 2<br/>OS=Loxosceles in-<br/>termedia OX=58218<br/>PE=2 SV=1</b>                                  | <b>5.2E-32</b> | <b>260.11</b> |
| Phospholipase<br>A2 family. Group<br>III subfamily                       | Gene.64909_<br>Amphipo-<br>rous_19895_<br>g.64909_m.64<br>909            | PA23_HELSU         | Phospholipase A2<br>isozymes<br>PA3A/PA3B/PA5<br>OS=Heloderma<br>suspectum<br>OX=8554 PE=1<br>SV=3                                           | 2E-19          | 1029.82       |
| Type-B carboxy-<br>lesterase/lipase<br>family                            | Gene.23960_<br>Amphipo-<br>rous_3328_g.<br>23960_m.239<br>60             | ACES_BUNFA         | Acetylcholinester-<br>ase OS=Bungarus<br>fasciatus OX=8613<br>GN=ACHE PE=1<br>SV=2                                                           | 5.3E-126       | 15.33         |
| Proteinase inhibitors                                                    |                                                                          |                    |                                                                                                                                              |                |               |
| Venom Kunitz-<br>type family                                             | Gene.41216_<br>Amphipo-<br>rous_7730_g.<br>41216_m.412<br>16             | VKT1D_CONCL        | Kunitz-type serine<br>protease inhibitor<br>conotoxin Cal9.1d<br>(Fragment) OS=Cal-<br>iforniconus califor-<br>nicus OX=1736779<br>PE=2 SV=1 | 1.1E-16        | 35.41         |

|                                                                                |                                                      |             |                                                                                                                          |         |        |
|--------------------------------------------------------------------------------|------------------------------------------------------|-------------|--------------------------------------------------------------------------------------------------------------------------|---------|--------|
| Venom Kunitz-type family. 02 (native) subfamily                                | Gene.52236_<br>Amphiporous_11892_<br>g.52236_m.52236 | VKT1_ARAVE  | Kunitz-type U1-aranetoxin-Av1a<br>OS=Araneus ventricosus OX=182803<br>PE=2 SV=1                                          | 5.6E-8  | 10.78  |
| Venom Kunitz-type family. Sea anemone type 2 potassium channel toxin subfamily | Gene.27479_<br>Amphiporous_4081_<br>g.27479_m.27479  | VKT3C_ACTEQ | PI-actitoxin-Aeq3c<br>OS=Actinia equina<br>OX=6106 PE=1<br>SV=1                                                          | 7.8E-14 | 129.20 |
| Ion channel inhibitor activity                                                 |                                                      |             |                                                                                                                          |         |        |
| CRISP family. Venom allergen 5-like subfamily                                  | Gene.59180_<br>Amphiporous_15642_<br>g.59180_m.59180 | VA552_SCODE | Scoloptoxin SSD552<br>OS=Scolopendra dehaani<br>OX=2609776 PE=1<br>SV=1                                                  | 7.3E-17 | 3.27   |
|                                                                                | Gene.49571_<br>Amphiporous_10741_<br>g.49571_m.49571 | VA576_SCODE | Scoloptoxin SSD976<br>OS=Scolopendra dehaani<br>OX=2609776 PE=1<br>SV=1                                                  | 6.7E-23 | 30.43  |
| Sea anemone structural class 9a family                                         | Gene.21587_<br>Amphiporous_2850_<br>g.21587_m.21587  | TX9A_ANTMC  | Delta-actitoxin-Amc1a<br>OS=Antheopsis maculata<br>OX=280228 PE=1<br>SV=1                                                | 1.8E-6  | 114.61 |
| Scoloptoxin-11 family                                                          | Gene.78441_<br>Amphiporous_37091_<br>g.78441_m.78441 | TX14B_SCODE | Scoloptoxin SSD20 (Fragment)<br>OS=Scolopendra dehaani<br>OX=2609776 PE=1<br>SV=1                                        | 2E-10   | 2.80   |
| Hemostasis impairing toxin                                                     |                                                      |             |                                                                                                                          |         |        |
| Snaclec family                                                                 | Gene.59882_<br>Amphiporous_16109_<br>g.59882_m.59882 | SL9A_PROFL  | Snaclec coagulation factor IX/factor X-binding protein subunit A<br>OS=Protophthorops flavoviridis OX=88087<br>PE=1 SV=2 | 4.8E-6  | 1.89   |
|                                                                                | Gene.59450_<br>Amphiporous_15814_<br>g.59450_m.59450 | SLA_BOTIN   | Snaclec bothroinsularin subunit alpha<br>OS=Bothrops insularis OX=8723<br>PE=1 SV=1                                      | 2E-6    | 1.91   |
|                                                                                | Gene.60327_<br>Amphiporous_16401_<br>g.60327_m.60327 | SLA_GLOBR   | Snaclec salmorin subunit A<br>OS=Gloydus brevicaudus                                                                     | 4.9E-8  | 243.07 |

|                                                                                                                                                                      |                                                                         |                    |                                                                                                                                      |                |              |
|----------------------------------------------------------------------------------------------------------------------------------------------------------------------|-------------------------------------------------------------------------|--------------------|--------------------------------------------------------------------------------------------------------------------------------------|----------------|--------------|
| OX=259325 PE=1<br>SV=1                                                                                                                                               |                                                                         |                    |                                                                                                                                      |                |              |
|                                                                                                                                                                      | Gene.81843_<br>Amphipo-<br>rous_42700_<br>g.81843_m.81<br>843           | SLA1_DEIAC         | Snaclec agglucetin<br>subunit alpha-1<br>OS=Deinagkistro-<br>don acutus<br>OX=36307 PE=1<br>SV=1                                     | 1E-6           | 2.03         |
|                                                                                                                                                                      | Gene.58164_<br>Amphipo-<br>rous_15029_<br>g.58164_m.58<br>164           | SLRB_BITRH         | Snaclec rhinocetin<br>subunit beta OS=Bi-<br>tis rhinoceros<br>OX=715877 PE=1<br>SV=1                                                | 5.1E-6         | 4.70         |
|                                                                                                                                                                      | Gene.66006_<br>Amphipo-<br>rous_20850_<br>g.66006_m.66<br>006           | SLA_BITAR          | Snaclec bitiscetin<br>subunit alpha<br>OS=Bitis arietans<br>OX=8692 PE=1<br>SV=1                                                     | 2.4E-6         | 3.02         |
| True venom lec-<br>tin family                                                                                                                                        | Gene.66666_<br>Amphipo-<br>rous_21506_<br>g.66666_m.66<br>666           | LECM1_ERYPO        | C-type lectin lec-<br>toxin-Lio1<br>OS=Erythrolampru<br>s poecilogyrus<br>OX=338838 PE=2<br>SV=1                                     | 2.8E-09        | 2.49         |
|                                                                                                                                                                      | Gene.63849_<br>Amphipo-<br>rous_18988_<br>g.63849_m.63<br>849           | LECM1_HYDHA        | C-type lectin 1<br>OS=Hydrophis<br>hardwickii<br>OX=8781 PE=2<br>SV=1                                                                | 2.7E-07        | 1.82         |
| Other toxins candidates                                                                                                                                              |                                                                         |                    |                                                                                                                                      |                |              |
| Insulin family                                                                                                                                                       | Gene.56064_<br>Amphipo-<br>rous_13794_<br>g.56064_m.56<br>064           | INS1_CONTE         | Con-Ins Tx1<br>OS=Conus textile<br>OX=6494 PE=2<br>SV=1                                                                              | 6.8E-06        | 2.61         |
| <b>Insulin-like<br/>growth factor-<br/>binding protein<br/>domain, Kazal-<br/>type serine pro-<br/>tease inhibitor<br/>domain, Immu-<br/>noglobulin do-<br/>main</b> | <b>Gene.38477_<br/>Amphipo-<br/>rous_6906_g.<br/>38477_m.384<br/>77</b> | <b>IGFBP_CUPSA</b> | <b>Insulin-like<br/>growth factor-<br/>binding protein-re-<br/>lated protein 1<br/>OS=Cupiennius<br/>salei OX=6928 PE=2<br/>SV=1</b> | <b>2.5E-46</b> | <b>67.34</b> |
| LDL-receptor<br>class A domain                                                                                                                                       | Gene.44369_<br>Amphipo-<br>rous_8766_g.                                 | CPROH_CONVC        | Neuropeptide pro-<br>hormone-4 OS=Co-<br>nus victoriae                                                                               | 2E-19          | 24.69        |

|                                |                                              |             |                                                                                              |         |         |
|--------------------------------|----------------------------------------------|-------------|----------------------------------------------------------------------------------------------|---------|---------|
|                                | 44369_m.44369                                |             | OX=319920 PE=1 SV=1                                                                          |         |         |
| NGF-beta family                | Gene.54049_Amphiporous_12770_g.54049_m.54049 | NGFV_PSEPO  | Venom nerve growth factor OS=Pseudechis porphyriacus OX=8671 PE=2 SV=1                       | 3.4E-12 | 12.89   |
| PDGF/VEGF growth factor family | Gene.37959_Amphiporous_6754_g.37959_m.37959  | VEGFA_VIPAA | Vascular endothelial growth factor A OS=Vipera ammodytes ammodytes OX=8705 PE=2 SV=1         | 2.1E-10 | 7.12    |
| TCTP family                    | Gene.54532_Amphiporous_13003_g.54532_m.54532 | TCTP_BRABE  | Translationally-controlled tumor protein homolog OS=Branchiostoma belcheri OX=7741 PE=2 SV=1 | 3.5E-27 | 2253.54 |

Table S13. Toxin transcripts of *Malacobdella grossa*.

| Protein family                               | Transcript ID                             | Uniprot accession | Description                                                               | E-value | Expression, TPM |
|----------------------------------------------|-------------------------------------------|-------------------|---------------------------------------------------------------------------|---------|-----------------|
| Pore-forming toxins                          |                                           |                   |                                                                           |         |                 |
| MACPF domain                                 | Gene.21779_M_grossa_5772_g.21779_m.21779  | PV21_POMMA        | Perivitellin-2 67 kda subunit OS=Pomacea maculata OX=1245466 PE=1 SV=1    | 5.6E-59 | 209.15          |
|                                              | Gene.37448_M_grossa_16878_g.37448_m.37448 | PV21_POMCA        | Perivitellin-2 67 kda subunit OS=Pomacea canaliculata OX=400727 PE=1 SV=2 | 1.9E-11 | 15.35           |
| Enzymes                                      |                                           |                   |                                                                           |         |                 |
| Dnase II family                              | Gene.18803_M_grossa_4604_g.18803_m.18803  | DNA2_ACAPL        | Plancitoxin-1 OS=Acanthaster planci OX=133434 PE=1 SV=1                   | 3.8E-74 | 13.52           |
| Glycosyl hydrolase 56 family                 | Gene.25244_M_grossa_7377_g.25244_m.25244  | HYAL1_MESMA       | Hyaluronidase-1 OS=Mesobuthus martensii OX=34649 PE=1 SV=2                | 5.3E-70 | 5.02            |
| Phospholipase A2 family. Group III subfamily | Gene.32339_M_grossa_11758_g.32339_m.32339 | PA23_HELSU        | Phospholipase A2 isozymes PA3A/PA3B/PA5 OS=Heloderma                      | 1.7E-18 | 57.55           |



|                                                              |                                                       |             |                                                                                                                                  |         |        |
|--------------------------------------------------------------|-------------------------------------------------------|-------------|----------------------------------------------------------------------------------------------------------------------------------|---------|--------|
| suspectum<br>OX=8554 PE=1<br>SV=3                            |                                                       |             |                                                                                                                                  |         |        |
| Proteinase inhibitors                                        |                                                       |             |                                                                                                                                  |         |        |
| Venom Kunitz-type family                                     | Gene.26006_<br>M_grossa_77<br>64_g.26006_<br>m.26006  | VKT1_OXYMI  | Kunitz-type serine<br>protease inhibitor<br>microlepidin-1<br>OS=Oxyuranus mi-<br>crolepidotus<br>OX=111177 PE=2<br>SV=1         | 4.8E-11 | 64.37  |
|                                                              | Gene.31449_<br>M_grossa_11<br>069_g.31449_<br>m.31449 | VKT_PSEPC   | Kunitz-type serine<br>protease inhibitor<br>PPTI OS=Pseu-<br>docerastes persicus<br>OX=47769 PE=1<br>SV=1                        | 1.4E-14 | 10.66  |
| Venom Kunitz-type family. 02<br>(native) subfam-<br>ily      | Gene.33811_<br>M_grossa_13<br>000_g.33811_<br>m.33811 | VKT17_CYRHA | Kunitz-type serine<br>protease inhibitor<br>HNTX-03141017<br>(Fragment)<br>OS=Cyriopagopus<br>hainanus<br>OX=209901 PE=2<br>SV=1 | 4.3E-12 | 8.67   |
| Ion channel inhibitor activity                               |                                                       |             |                                                                                                                                  |         |        |
| CRISP family                                                 | Gene.14471_<br>M_grossa_31<br>36_g.14471_<br>m.14471  | CRVP_LATSE  | Cysteine-rich<br>venom protein<br>latisemin OS=Lati-<br>cauda semifasciata<br>OX=8631 PE=2<br>SV=1                               | 4.8E-23 | 5.94   |
| CRISP fam-<br>ily. Venom aller-<br>gen 5-like sub-<br>family | Gene.20111_<br>M_grossa_51<br>18_g.20111_<br>m.20111  | VA576_SCODE | Scoloptoxin SSD976<br>OS=Scolopendra<br>dehaani<br>OX=2609776 PE=1<br>SV=1                                                       | 2.3E-26 | 5.64   |
| Sea anemone<br>structural class 9a<br>family                 | Gene.29516_<br>M_grossa_97<br>55_g.29516_<br>m.29516  | TX9A_ANTMC  | Delta-actitoxin-<br>Amc1a OS=Anthe-<br>opsis maculata<br>OX=280228 PE=1<br>SV=1                                                  | 1.7E-14 | 174.77 |
| Hemostasis impairing toxin                                   |                                                       |             |                                                                                                                                  |         |        |
| SNTX/VTX toxin<br>family                                     | Gene.20782_<br>M_grossa_53<br>72_g.20782_<br>m.20782  | VTXB_SYNVE  | Verrucotoxin sub-<br>unit beta OS=Synan-<br>ceia verrucosa<br>OX=51996 PE=1<br>SV=3                                              | 3.9E-06 | 6.41   |
| True venom lec-<br>tin family                                | Gene.31520_<br>M_grossa_11                            | LECM4_PSEPL | C-type lectin lec-<br>toxin-Enh4<br>OS=Pseudoferania                                                                             | 6E-08   | 12.83  |

|                                                       |                                                       |             |                                                                                                                     |         |       |
|-------------------------------------------------------|-------------------------------------------------------|-------------|---------------------------------------------------------------------------------------------------------------------|---------|-------|
|                                                       | 121_g.31520_<br>m.31520                               |             | polylepis<br>OX=338839 PE=2<br>SV=1                                                                                 |         |       |
| Other toxins candidates                               |                                                       |             |                                                                                                                     |         |       |
| IGFBP N-termi-<br>nal, Kazal-like,<br>Ig-like C2-type | Gene.23069_<br>M_grossa_63<br>46_g.23069_<br>m.23069  | IGFBP_CUPSA | Insulin-like growth<br>factor-binding pro-<br>tein-related protein<br>1 OS=Cupiennius<br>salei OX=6928 PE=2<br>SV=1 | 2E-47   | 8.91  |
| LDL-receptor<br>class A domain                        | Gene.30471_<br>M_grossa_10<br>361_g.30471_<br>m.30471 | CPROH_CONVC | Neuropeptide pro-<br>hormone-4 OS=Co-<br>nus victoriae<br>OX=319920 PE=1<br>SV=1                                    | 2.9E-21 | 26.05 |
| PDGF/VEGF<br>growth factor<br>family                  | Gene.21287_<br>M_grossa_55<br>68_g.21287_<br>m.21287  | VEGFA_VIPAA | Vascular endothe-<br>lial growth factor A<br>OS=Vipera ammo-<br>dytes ammodytes<br>OX=8705 PE=2<br>SV=1             | 6.7E-11 | 4.89  |

**Table S14.** Toxin transcripts of *Paranemertes peregrina*. Unique toxins families are shown in bold.

| Protein family                                                                                               | Transcript ID                                                            | Uniprot accession  | Description                                                                                                                                  | E-value        | Expression, TPM |
|--------------------------------------------------------------------------------------------------------------|--------------------------------------------------------------------------|--------------------|----------------------------------------------------------------------------------------------------------------------------------------------|----------------|-----------------|
| Enzymes                                                                                                      |                                                                          |                    |                                                                                                                                              |                |                 |
| Glycosyl hydro-<br>lase 56 family                                                                            | Gene.13505_<br>P_pere-<br>grina_2885_g<br>.13505_m.135<br>05             | HYAL1_MESMA        | Hyaluronidase-1<br>OS=Mesobuthus<br>martensii<br>OX=34649 PE=1<br>SV=2                                                                       | 1.6E-59        | 4.15            |
| <b>Venom metal-<br/>loproteinase<br/>(M12B) fam-<br/>ily. P-II sub-<br/>family. P-iiia<br/>sub-subfamily</b> | <b>Gene.40257_<br/>P_pere-<br/>grina_19132_<br/>g.40257_m.40<br/>257</b> | <b>VM2RH_CALRH</b> | <b>Zinc metallopro-<br/>teinase/disintegrin<br/>OS=Calloselasma<br/>rhodostoma<br/>OX=8717 PE=1<br/>SV=2</b>                                 | <b>3.3E-16</b> | <b>4.6</b>      |
| Proteinase inhibitors                                                                                        |                                                                          |                    |                                                                                                                                              |                |                 |
| Venom Kunitz-<br>type family                                                                                 | Gene.34086_<br>P_pere-<br>grina_13107_<br>g.34086_m.34<br>086            | VKT1D_CONCL        | Kunitz-type serine<br>protease inhibitor<br>conotoxin Cal9.1d<br>(Fragment) OS=Cal-<br>iforniconus califor-<br>nicus OX=1736779<br>PE=2 SV=1 | 7.9E-15        | 9.22            |
| Venom Kunitz-<br>type family. Sea<br>anemone type 2                                                          | Gene.30860_<br>P_pere-<br>grina_10693_                                   | VKT3_ANTAF         | PI-actitoxin-Axm2b<br>OS=Anthopleura<br>aff.                                                                                                 | 1.2E-15        | 110.86          |

|                                               |                                               |             |                                                                                                                      |         |       |
|-----------------------------------------------|-----------------------------------------------|-------------|----------------------------------------------------------------------------------------------------------------------|---------|-------|
| potassium channel toxin subfamily             | g.30860_m.30860                               |             | Xanthogrammica<br>OX=152178 PE=1<br>SV=1                                                                             |         |       |
| Ion channel inhibitor activity                |                                               |             |                                                                                                                      |         |       |
| CRISP family. Venom allergen 5-like subfamily | Gene.6371_P_pere-grina_1018_g.6371_m.6371     | VA576_SCODE | Scoloptoxin SSD976<br>OS=Scolopendra dehaani<br>OX=2609776 PE=1<br>SV=1                                              | 1.1E-28 | 11.64 |
| Scoloptoxin-11 family                         | Gene.23106_P_pere-grina_6437_g.23106_m.23106  | TX14B_SCODE | Scoloptoxin SSD20 (Fragment)<br>OS=Scolopendra dehaani<br>OX=2609776 PE=1<br>SV=1                                    | 2.2E-20 | 4.00  |
| Hemostasis impairing toxin                    |                                               |             |                                                                                                                      |         |       |
| Snaclec family                                | Gene.34963_P_pere-grina_13832_g.34963_m.34963 | SLAE_MACLB  | Snaclec A14<br>OS=Macrovipera lebetina OX=8709<br>PE=2 SV=1                                                          | 3.5E-6  | 3.00  |
|                                               | Gene.38662_P_pere-grina_17339_g.38662_m.38662 | SLLC2_DABSI | Snaclec coagulation factor X-activating enzyme light chain 2<br>OS=Daboia siamensis OX=343250<br>GN=LC2 PE=1<br>SV=1 | 3.8E-10 | 8.49  |
| SNTX/VTX toxin family                         | Gene.2895_P_pere-grina_341_g.2895_m.2895      | STXA_SYNVE  | Neoverrucotoxin subunit alpha<br>OS=Synanceia verrucosa OX=51996<br>PE=1 SV=1                                        | 3.7E-13 | 14.73 |
|                                               | Gene.14425_P_pere-grina_3163_g.14425_m.14425  | CTXA_SCOPL  | Cytolytic toxin-alpha<br>OS=Scorpaena plumieri<br>OX=274700 PE=1<br>SV=1                                             | 8.7E-14 | 8.72  |
| Other toxins candidates                       |                                               |             |                                                                                                                      |         |       |
| LDL-receptor class A domain                   | Gene.17193_P_pere-grina_4084_g.17193_m.17193  | CPROH_CONVC | Neuropeptide pro-hormone-4<br>OS=Conus victoriae<br>OX=319920 PE=1<br>SV=1                                           | 2.5E-19 | 8.15  |
| Venom complement C3 homolog family            | Gene.8194_P_pere-grina_1422_g.8194_m.8194     | VCO31_AUSSU | A.superbus venom factor 1<br>OS=Austrelaps superbus<br>OX=29156 PE=1<br>SV=1                                         | 5.2E-49 | 9.40  |
